# Supplementary material for: Doxorubicin induces cardiotoxicity in a pluripotent stem cell model of aggressive B cell lymphoma cancer patients
Source: Springer Nature journal article supplement (doi:10.1007/s00395-022-00918-7), 2022-03-08

ACT-patient after DOX treatment, Fig. 7 I

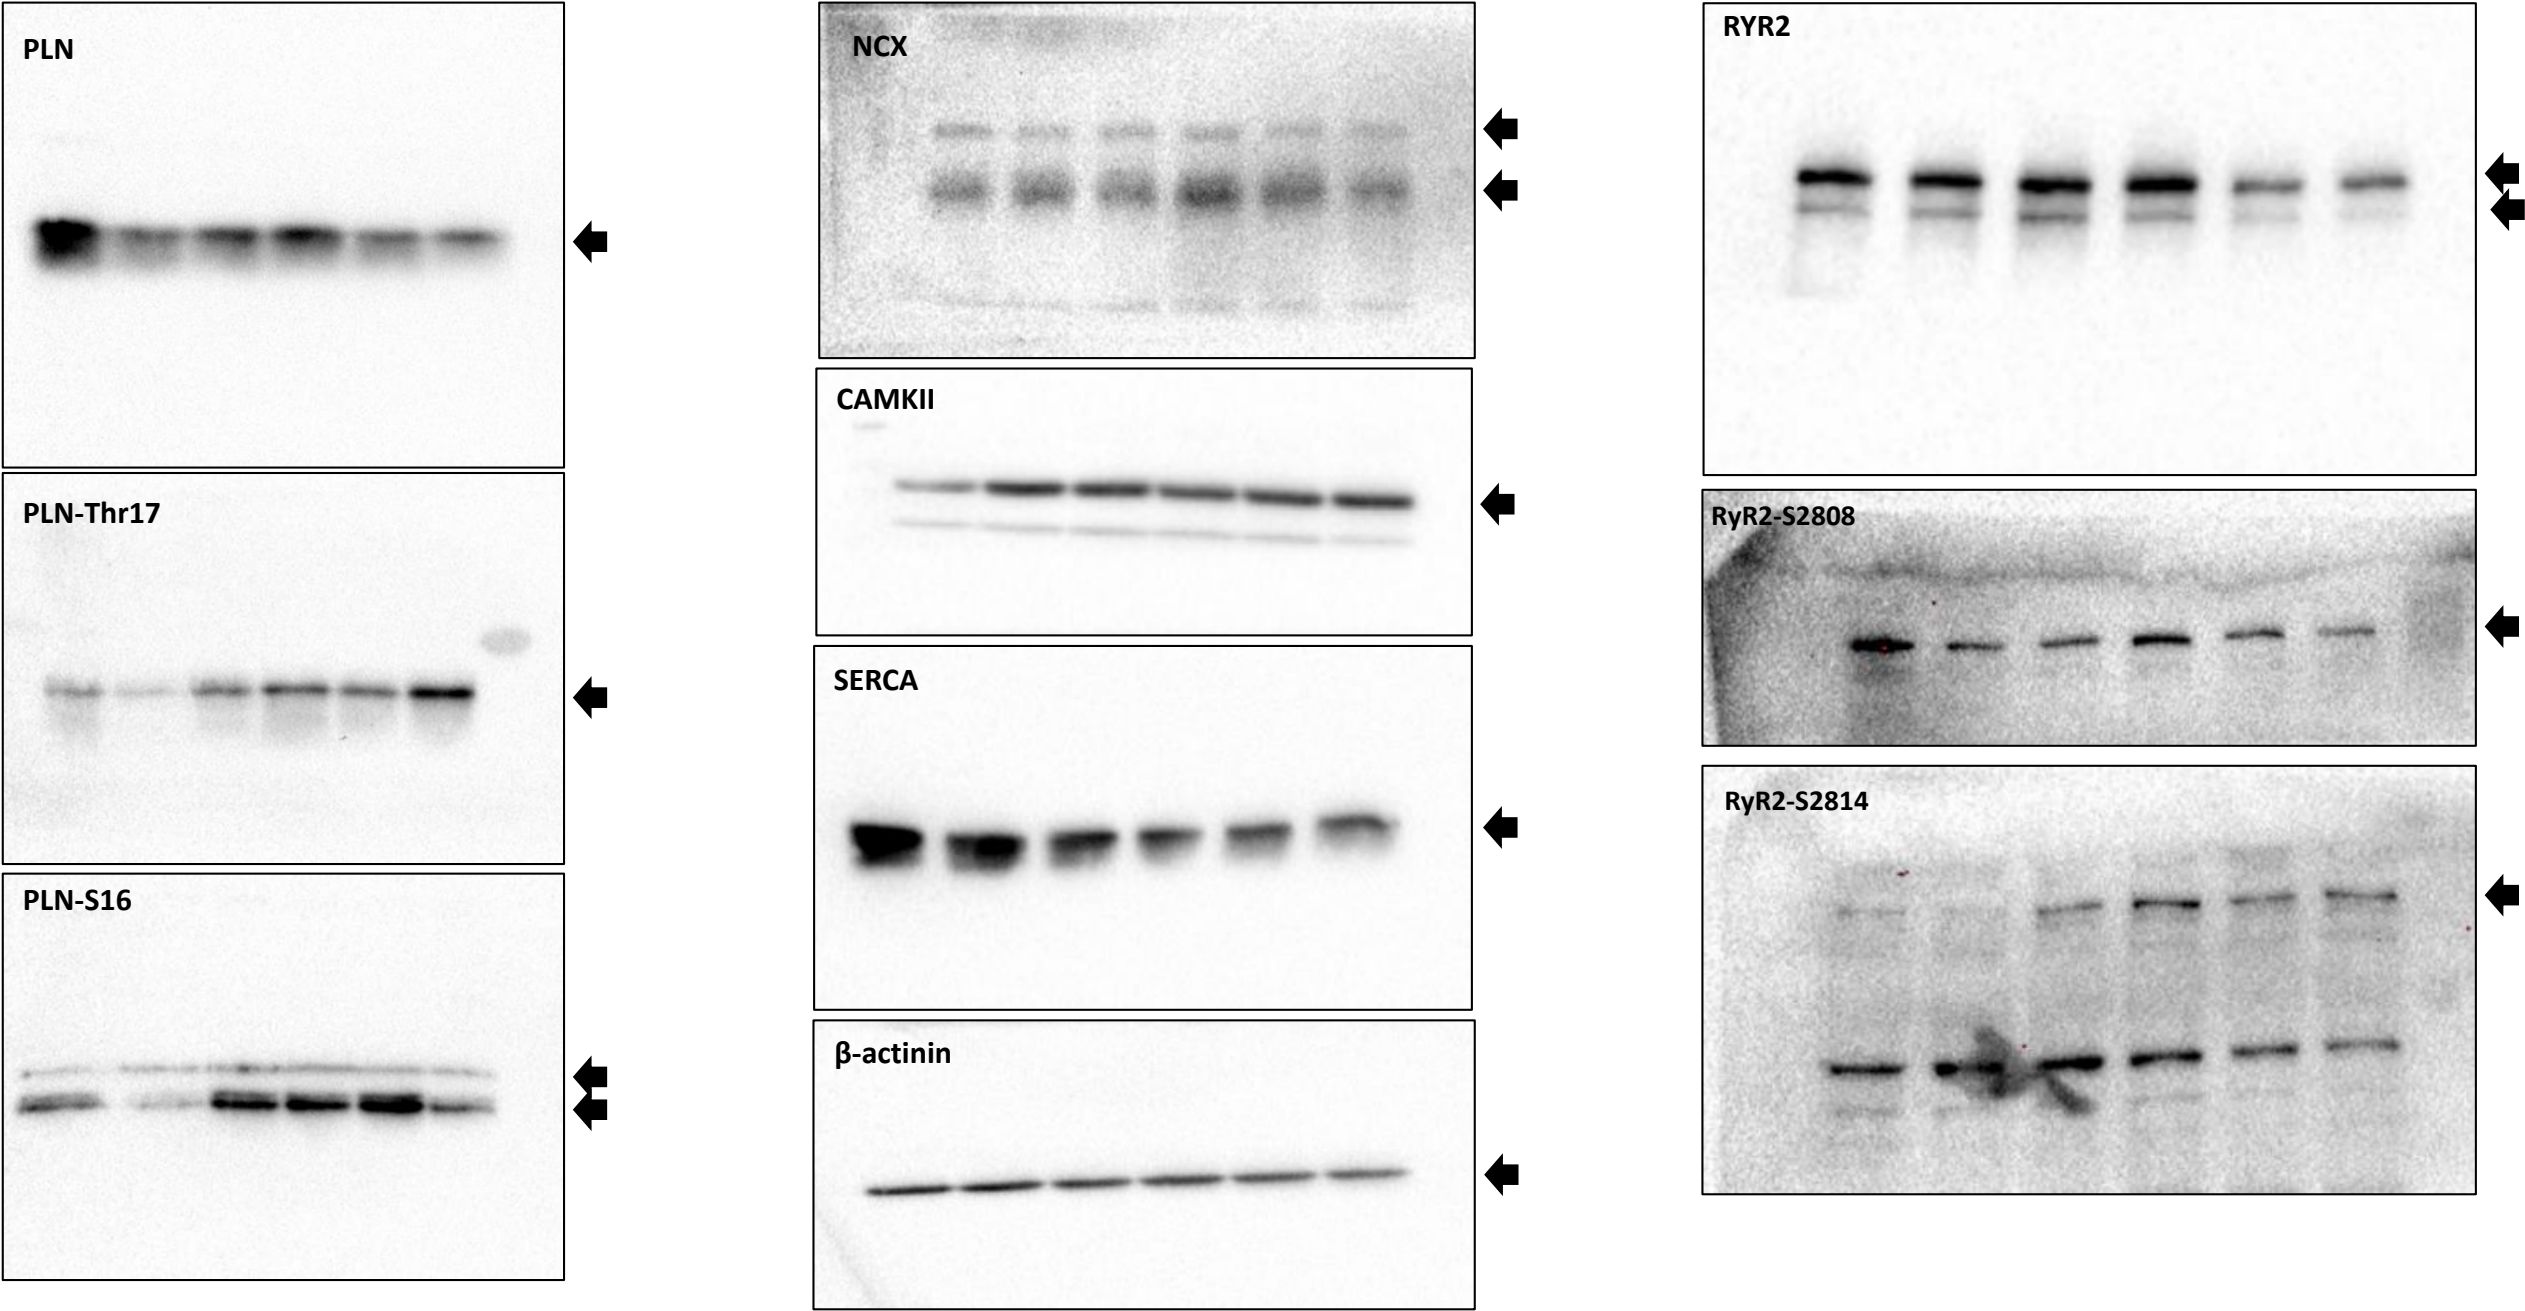

Control after DOX treatment, Fig. 7I

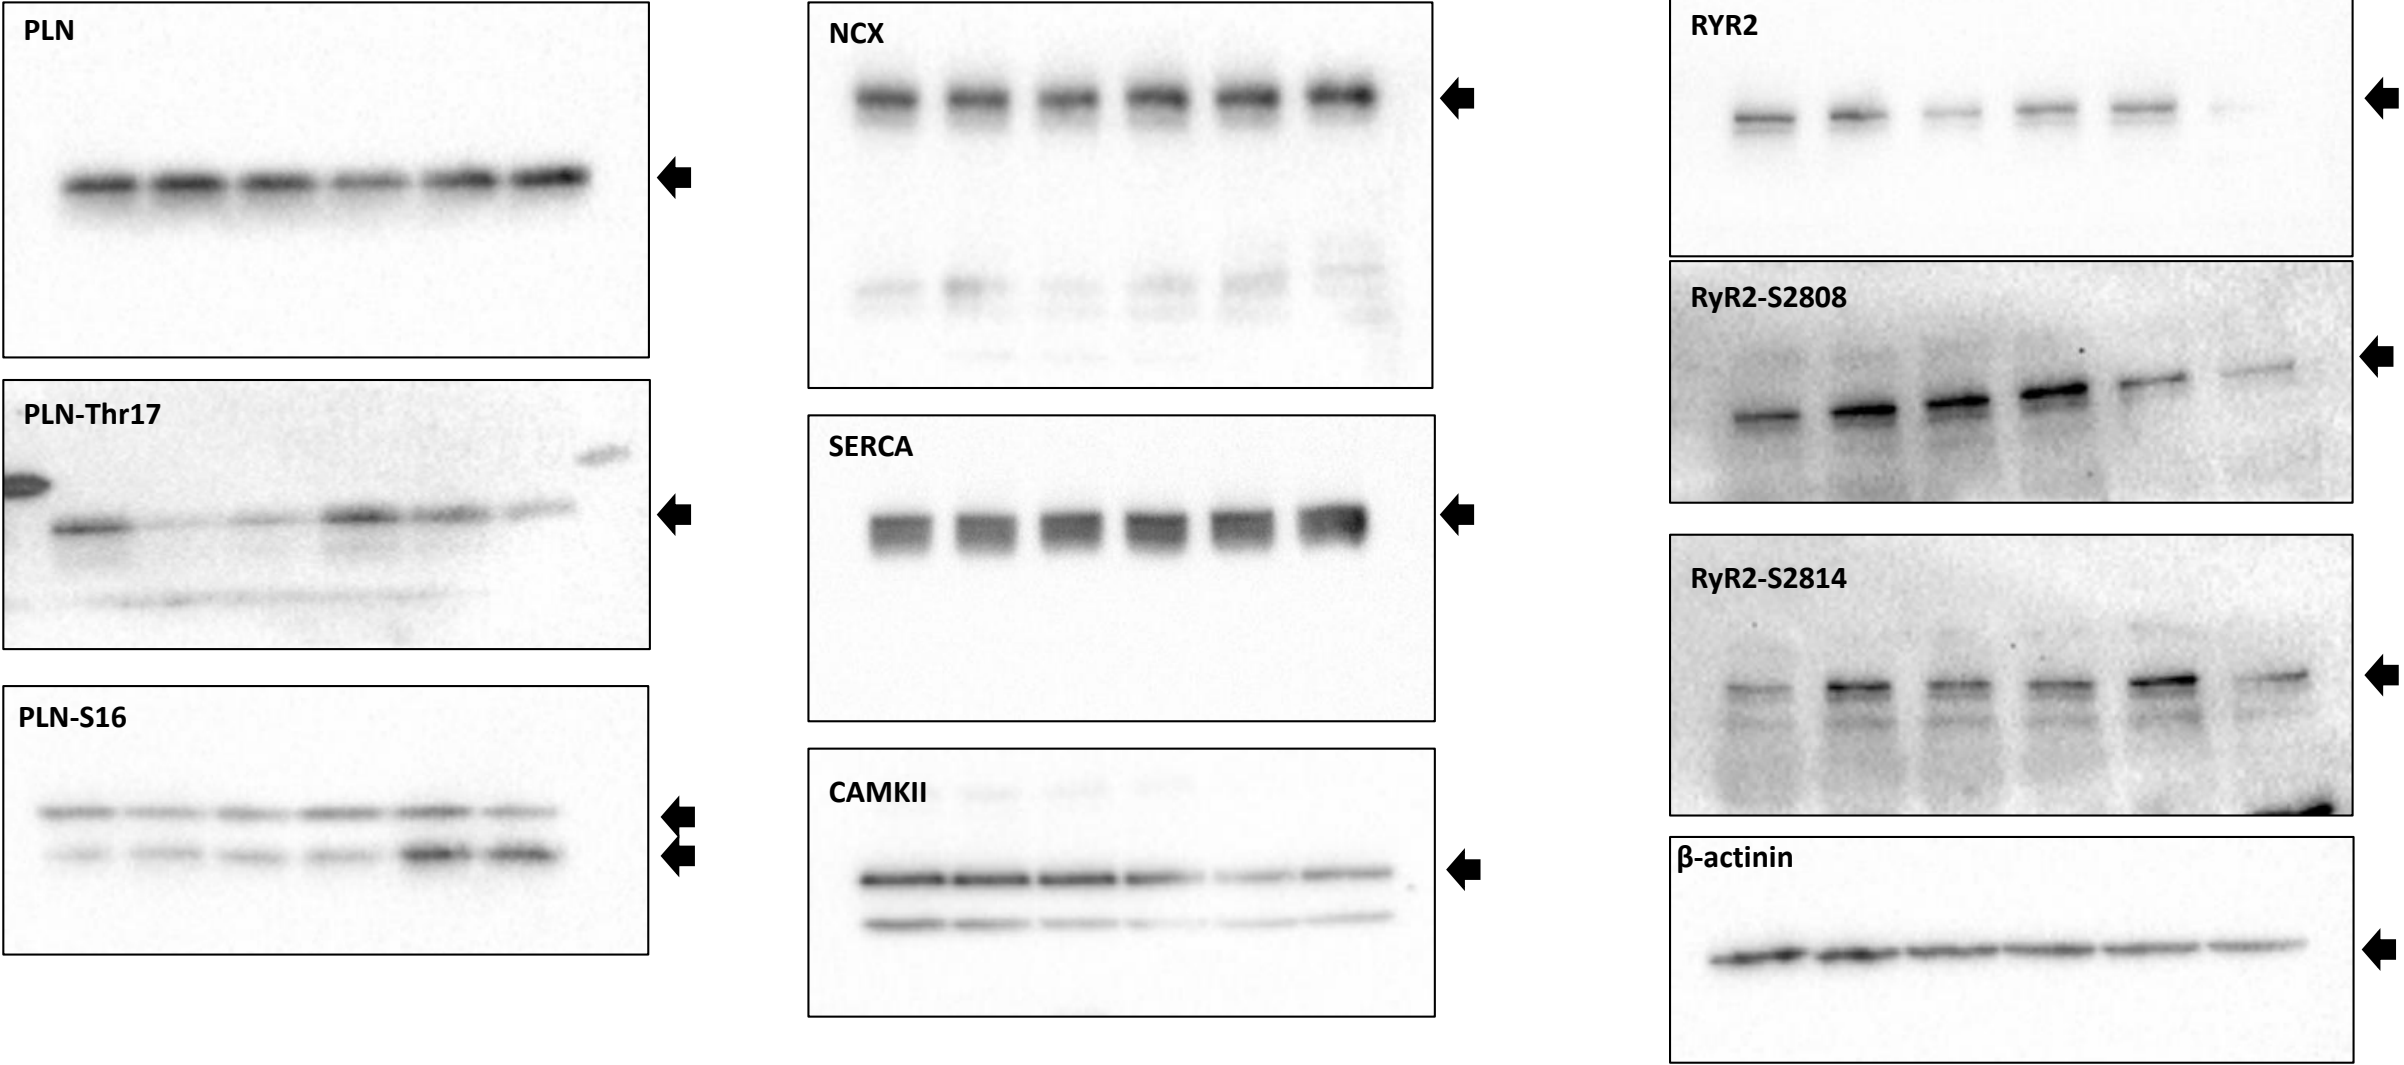

Basal expression of calcium handling proteins, Supplementary Figure 5B

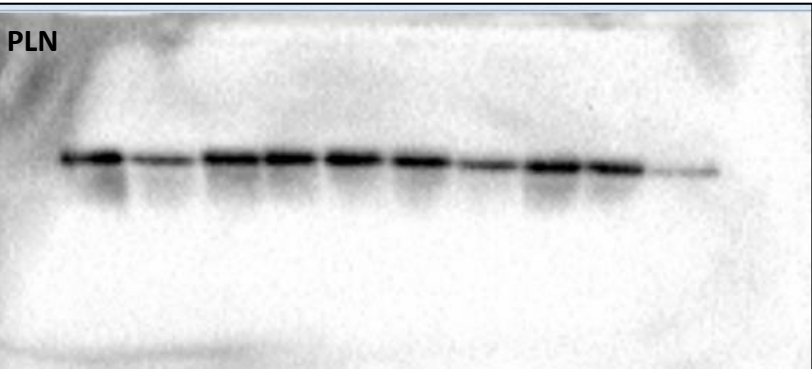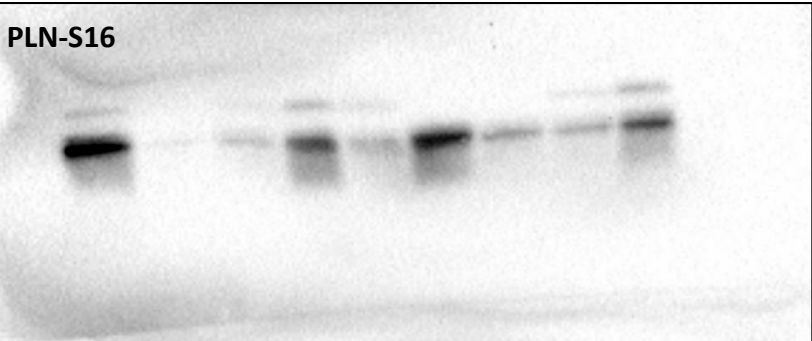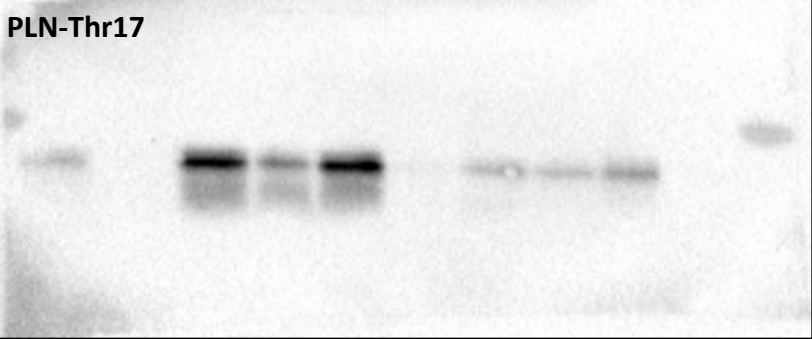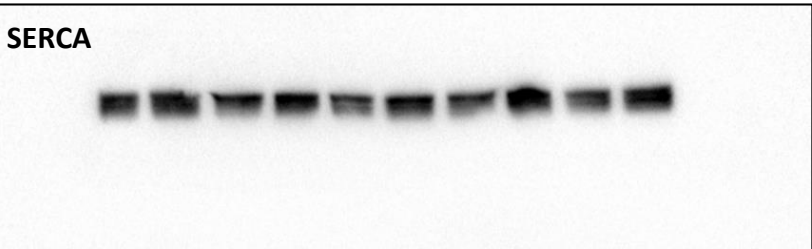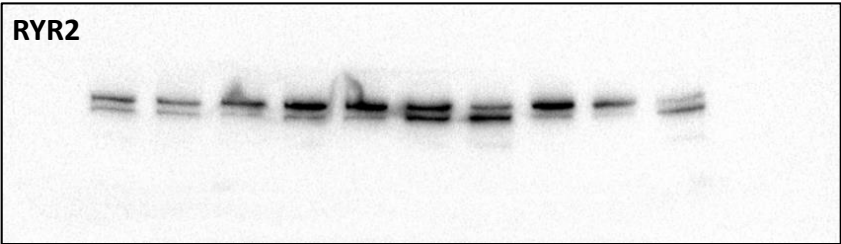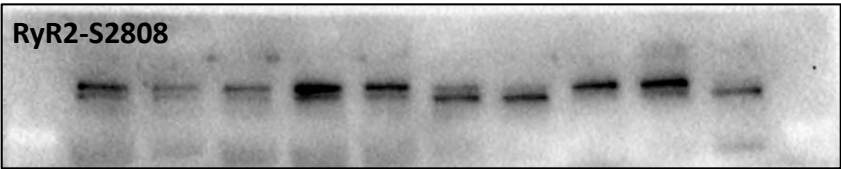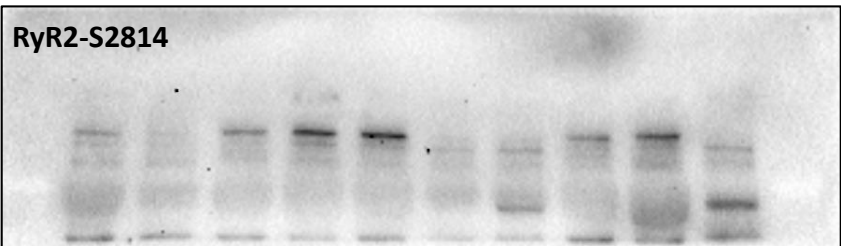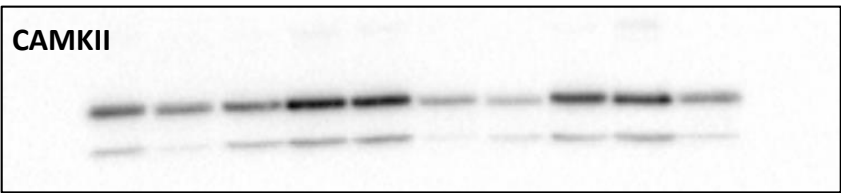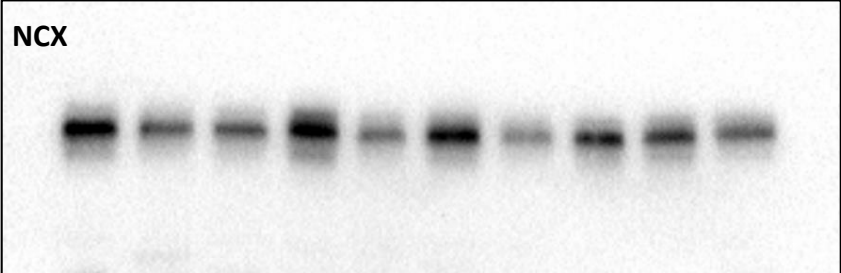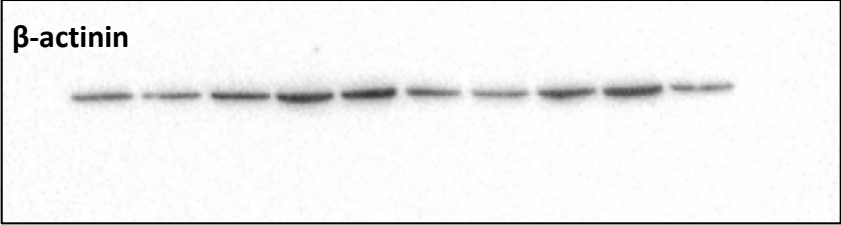

Supplement: MOESM1 [file 395_2022_918_MOESM1_ESM.pdf › 395_2022_918_MOESM1_ESM.pdf]
