# Supplementary material for: Doxorubicin induces cardiotoxicity in a pluripotent stem cell model of aggressive B cell lymphoma cancer patients
Source: Springer Nature journal article supplement (doi:10.1007/s00395-022-00918-7), 2022-03-08

Supplementary Figure 1: Overview of the used material

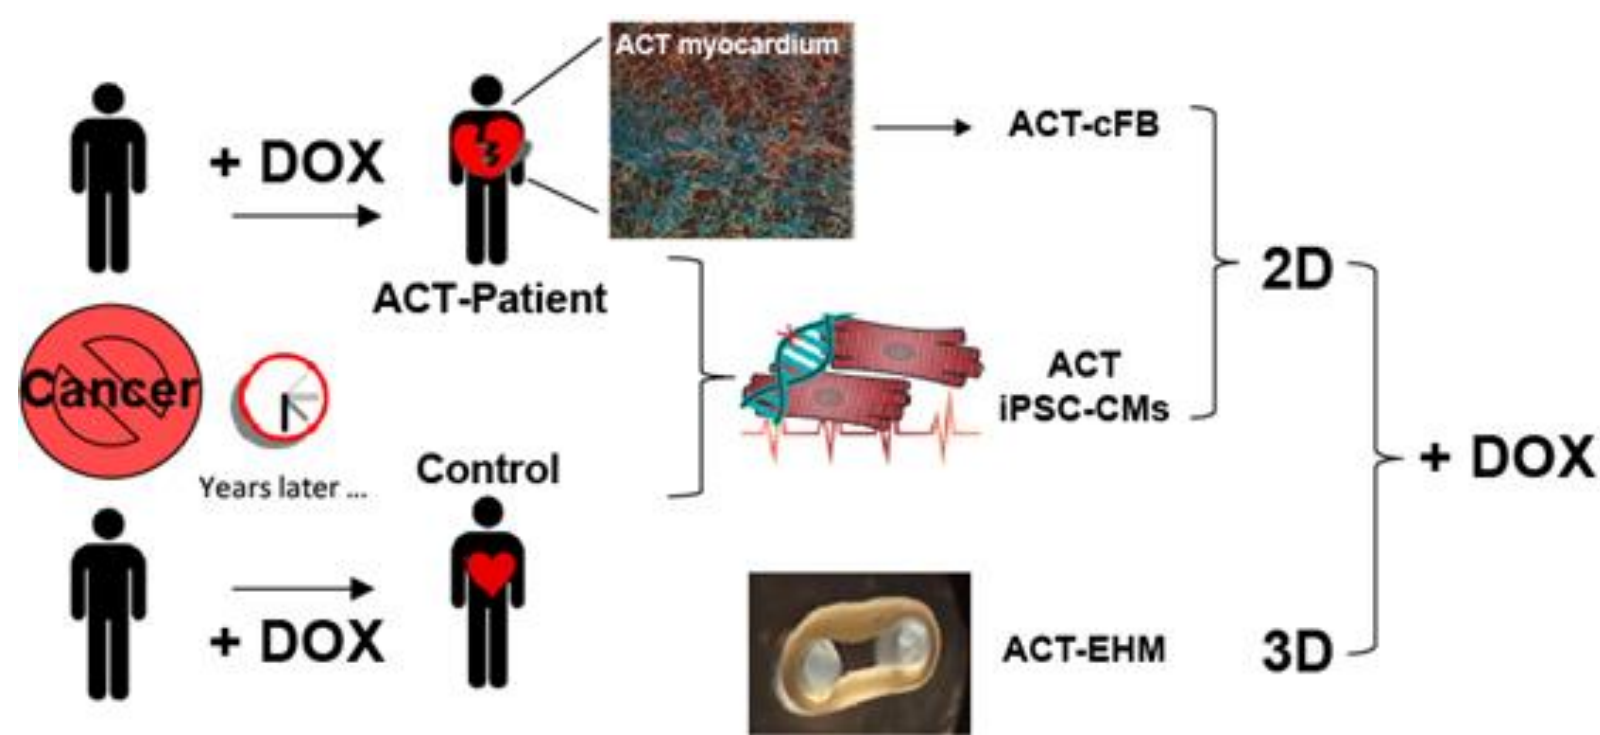

Supplementary Figure 2: Human ACT myocardium\_cFB

A: Human isolated cardiac fibroblasts from ACT myocardium

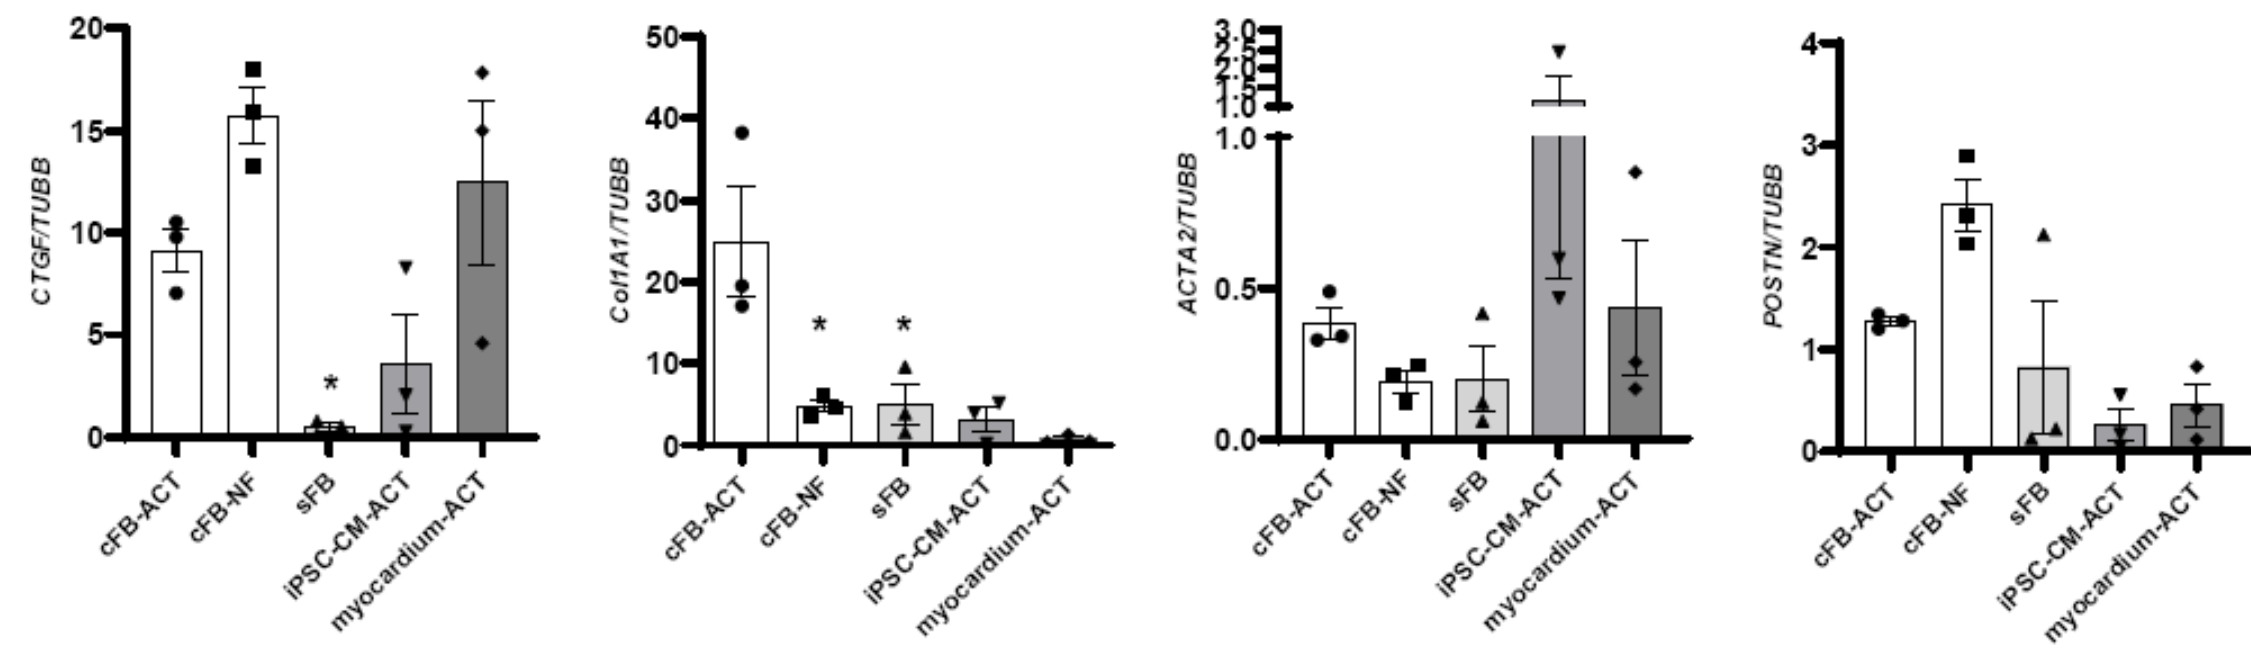

B: ACT-cFB

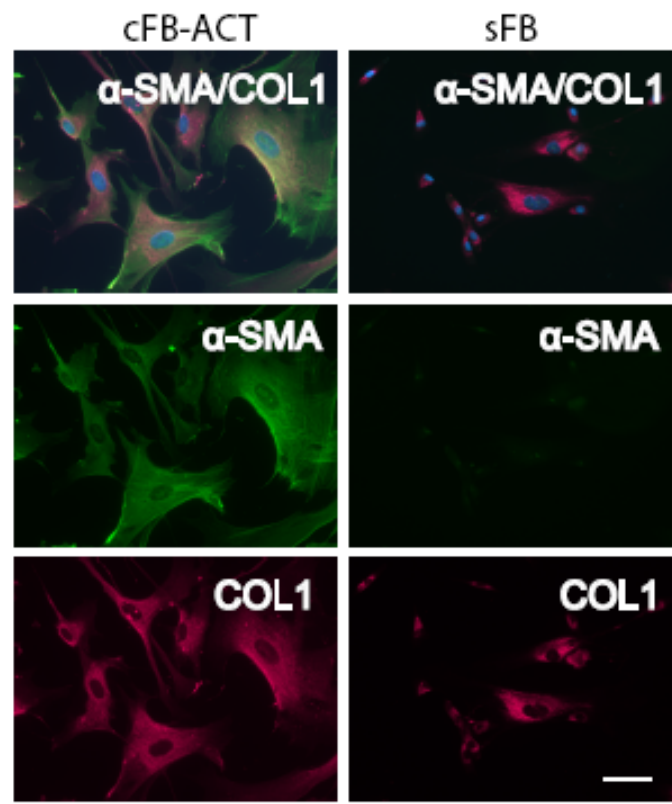



Supplementary Figure 3: Characterization of generated iPSC

A

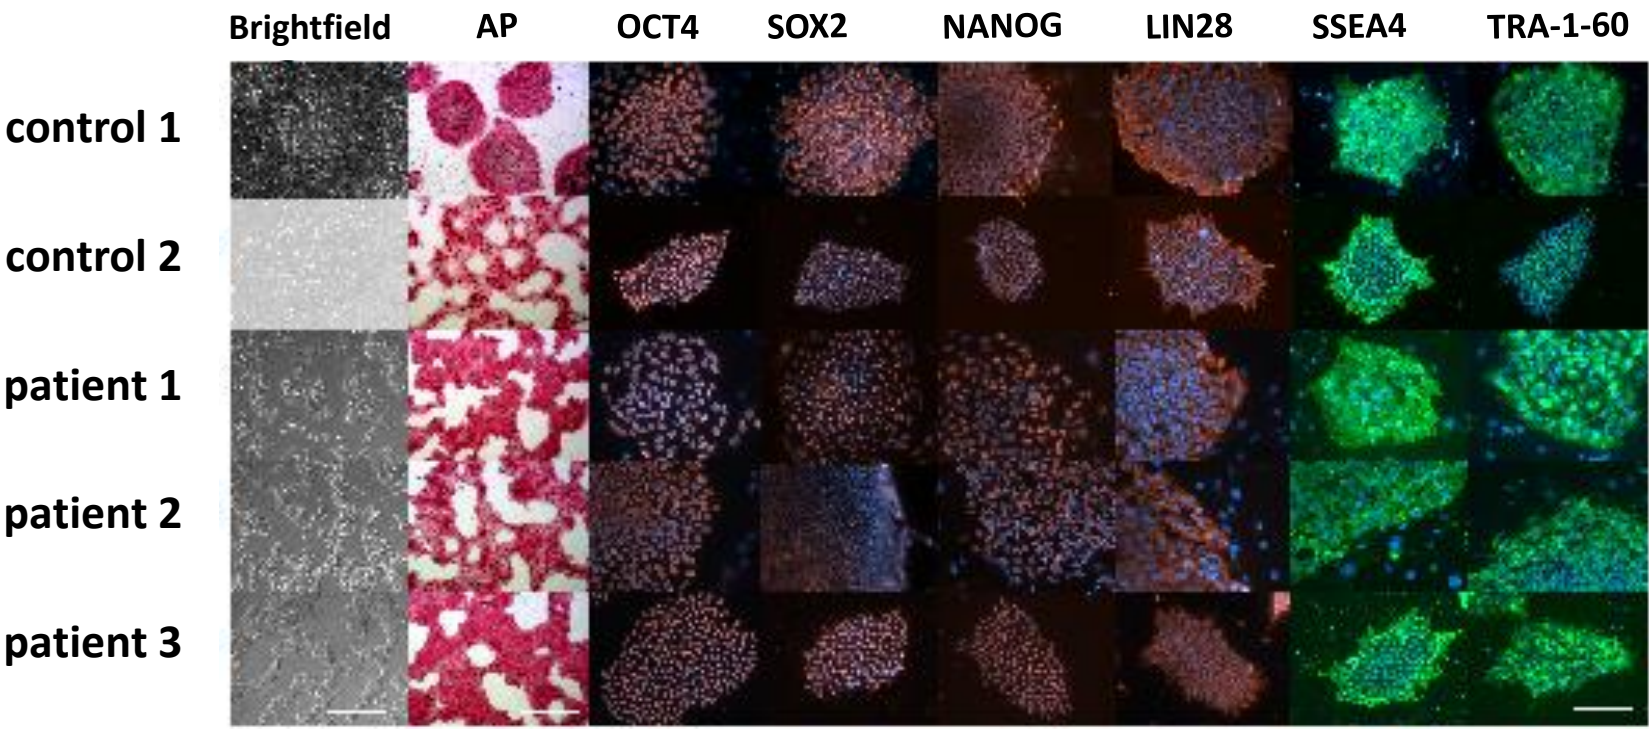

B

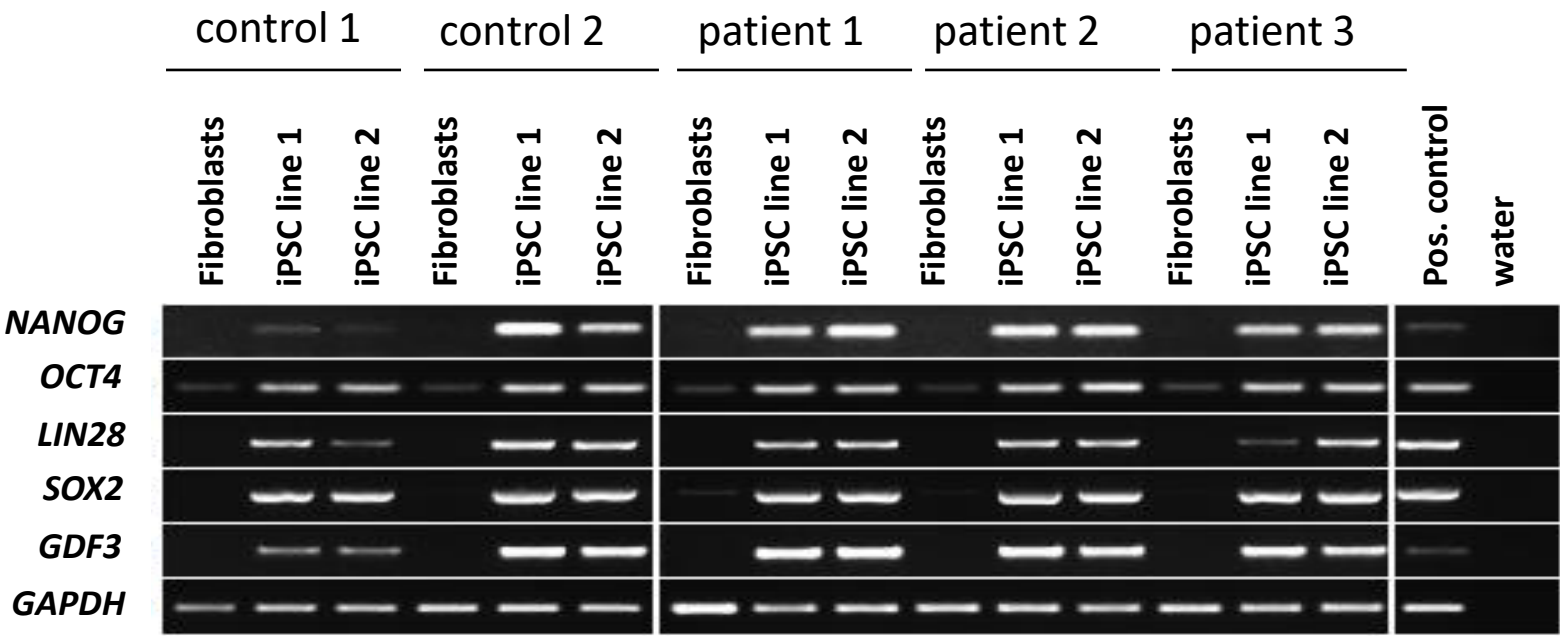

C

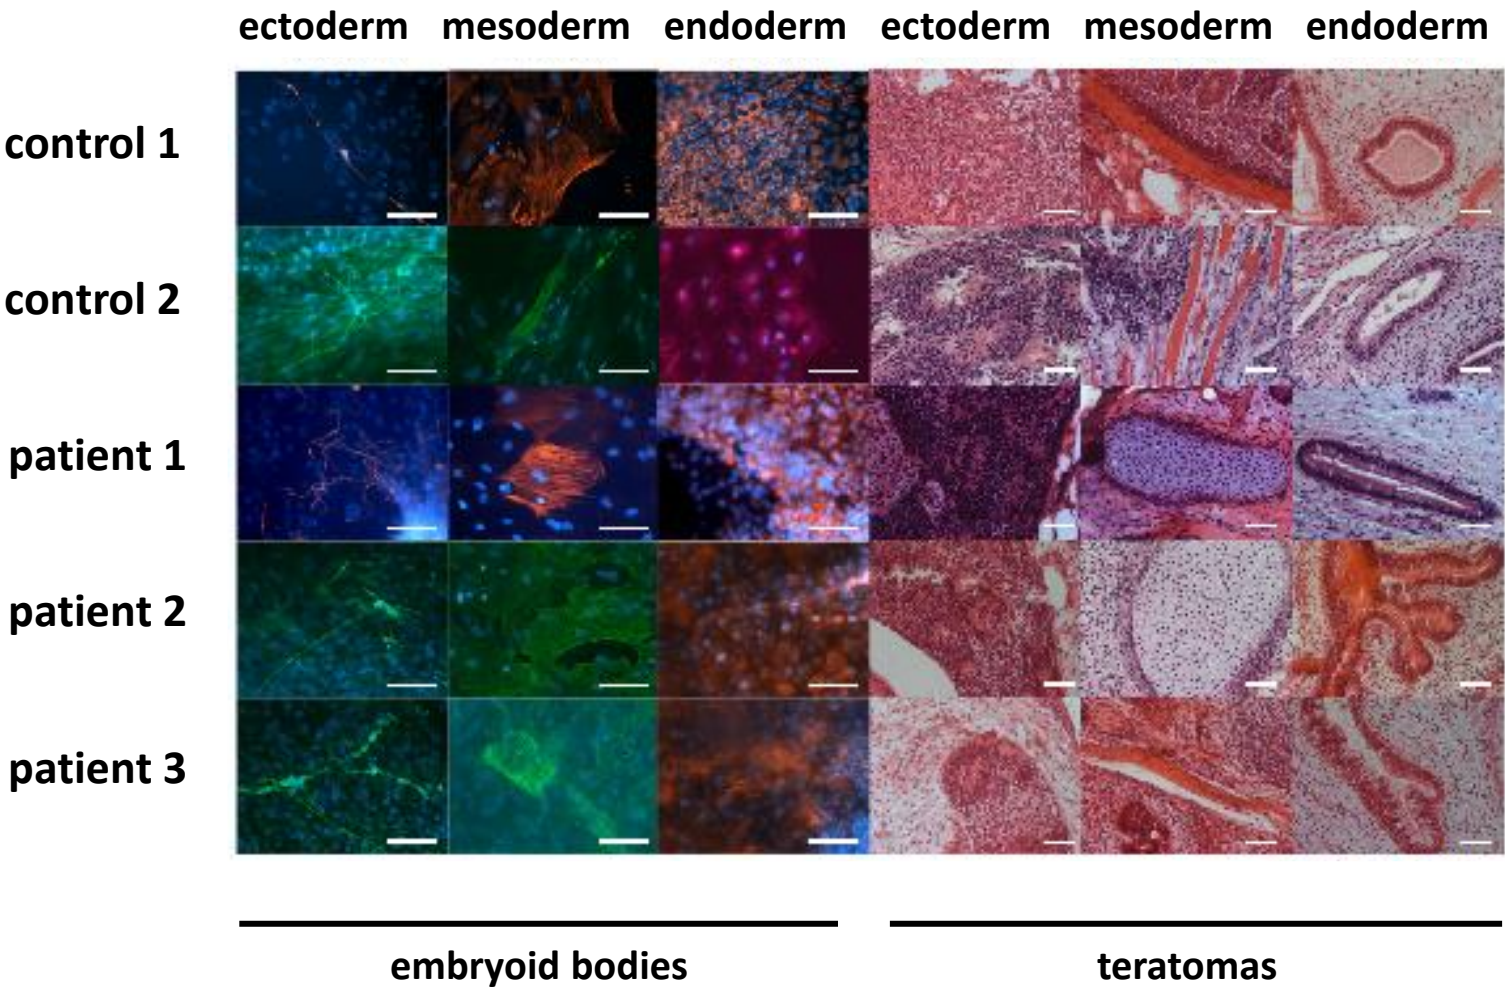





Supplementary Figure 5: Cell arrest in iPSC-CM and iPSC

A

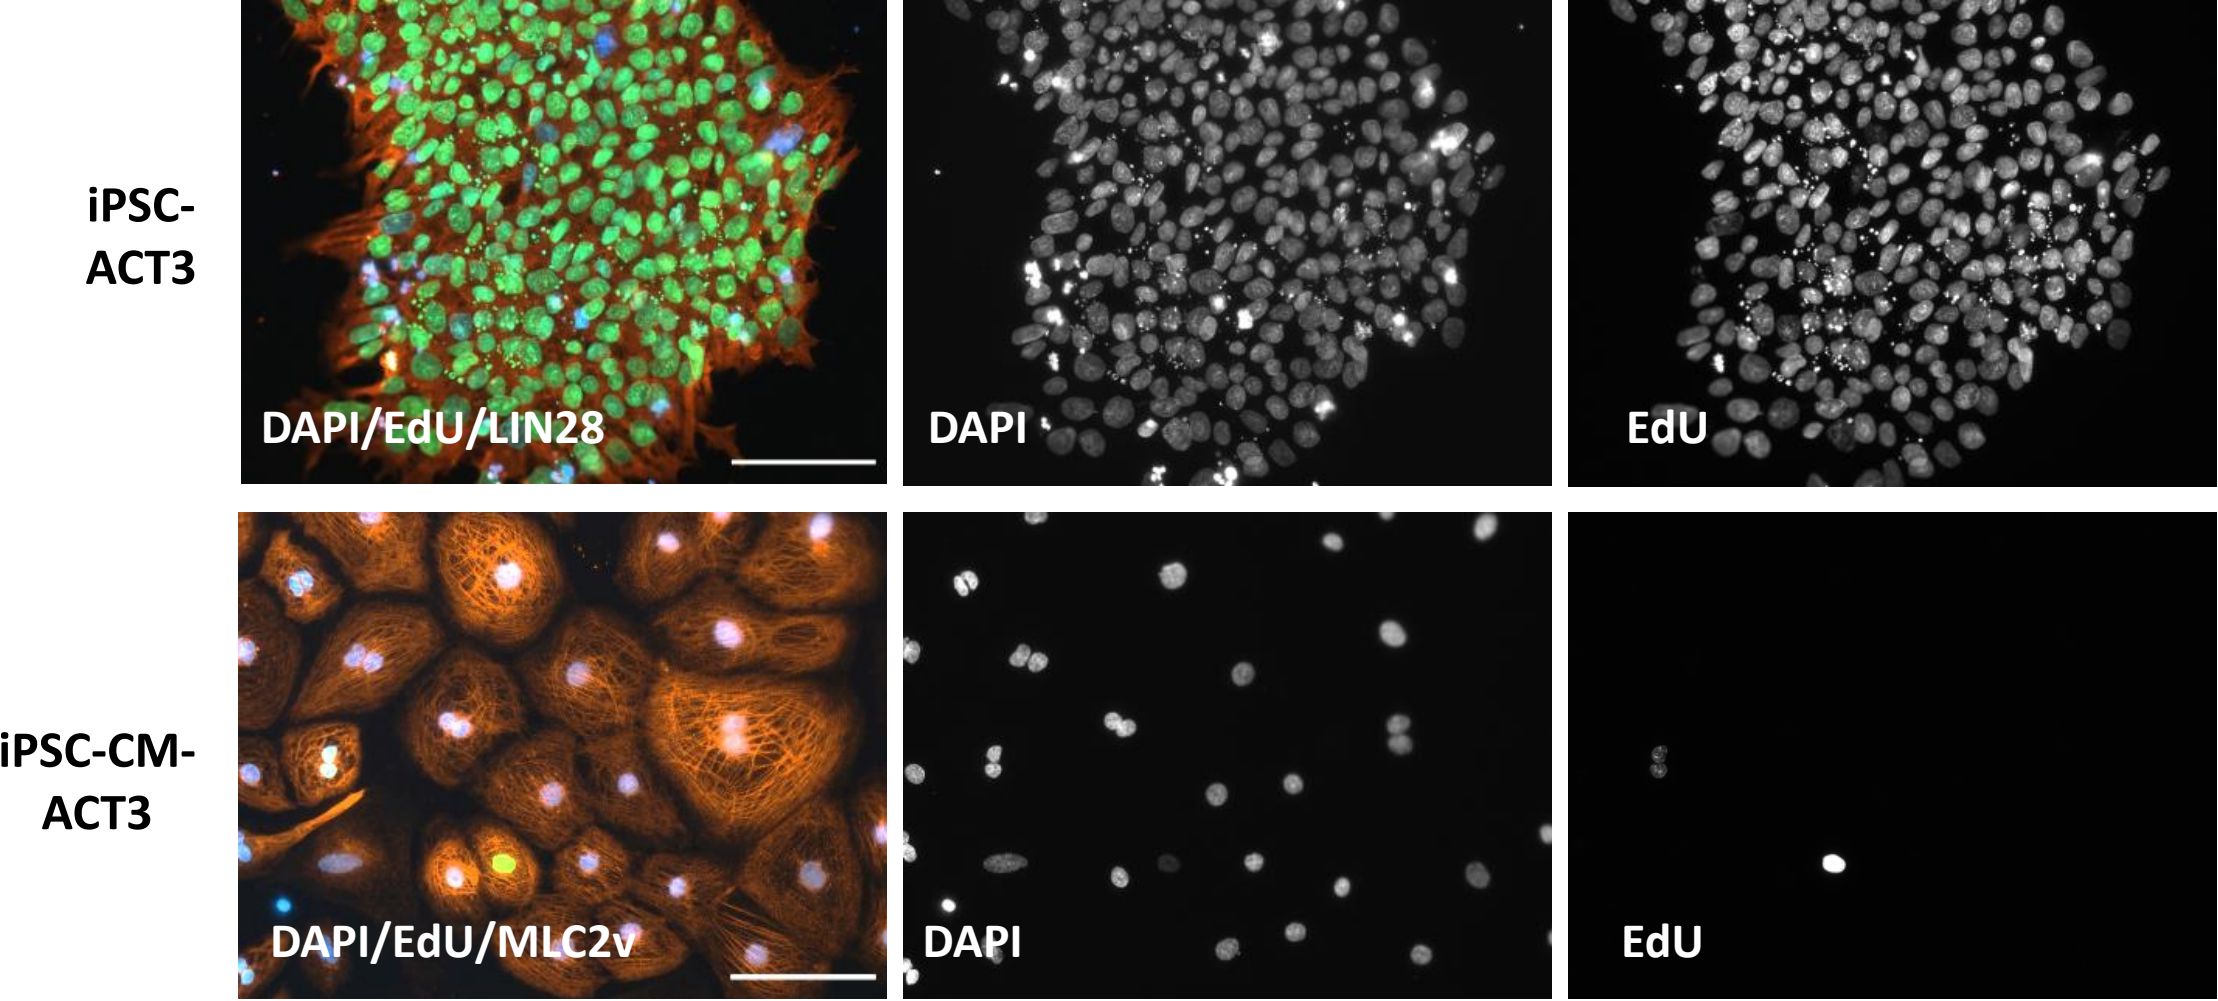

B

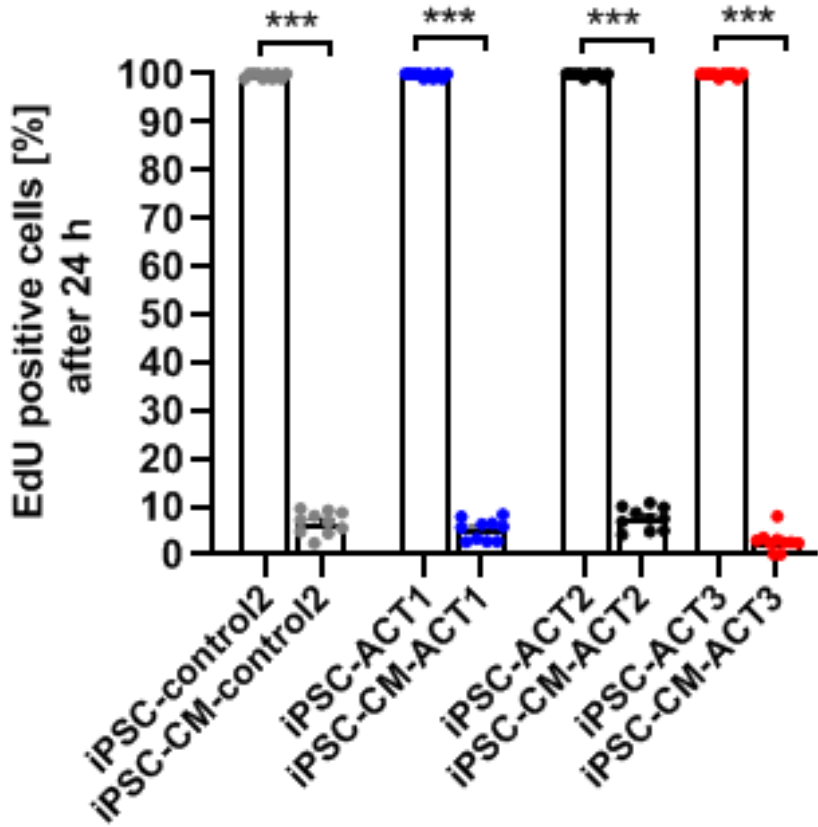

### Supplementary Figure 6: DOX-dependent alterations on a patient-specific level

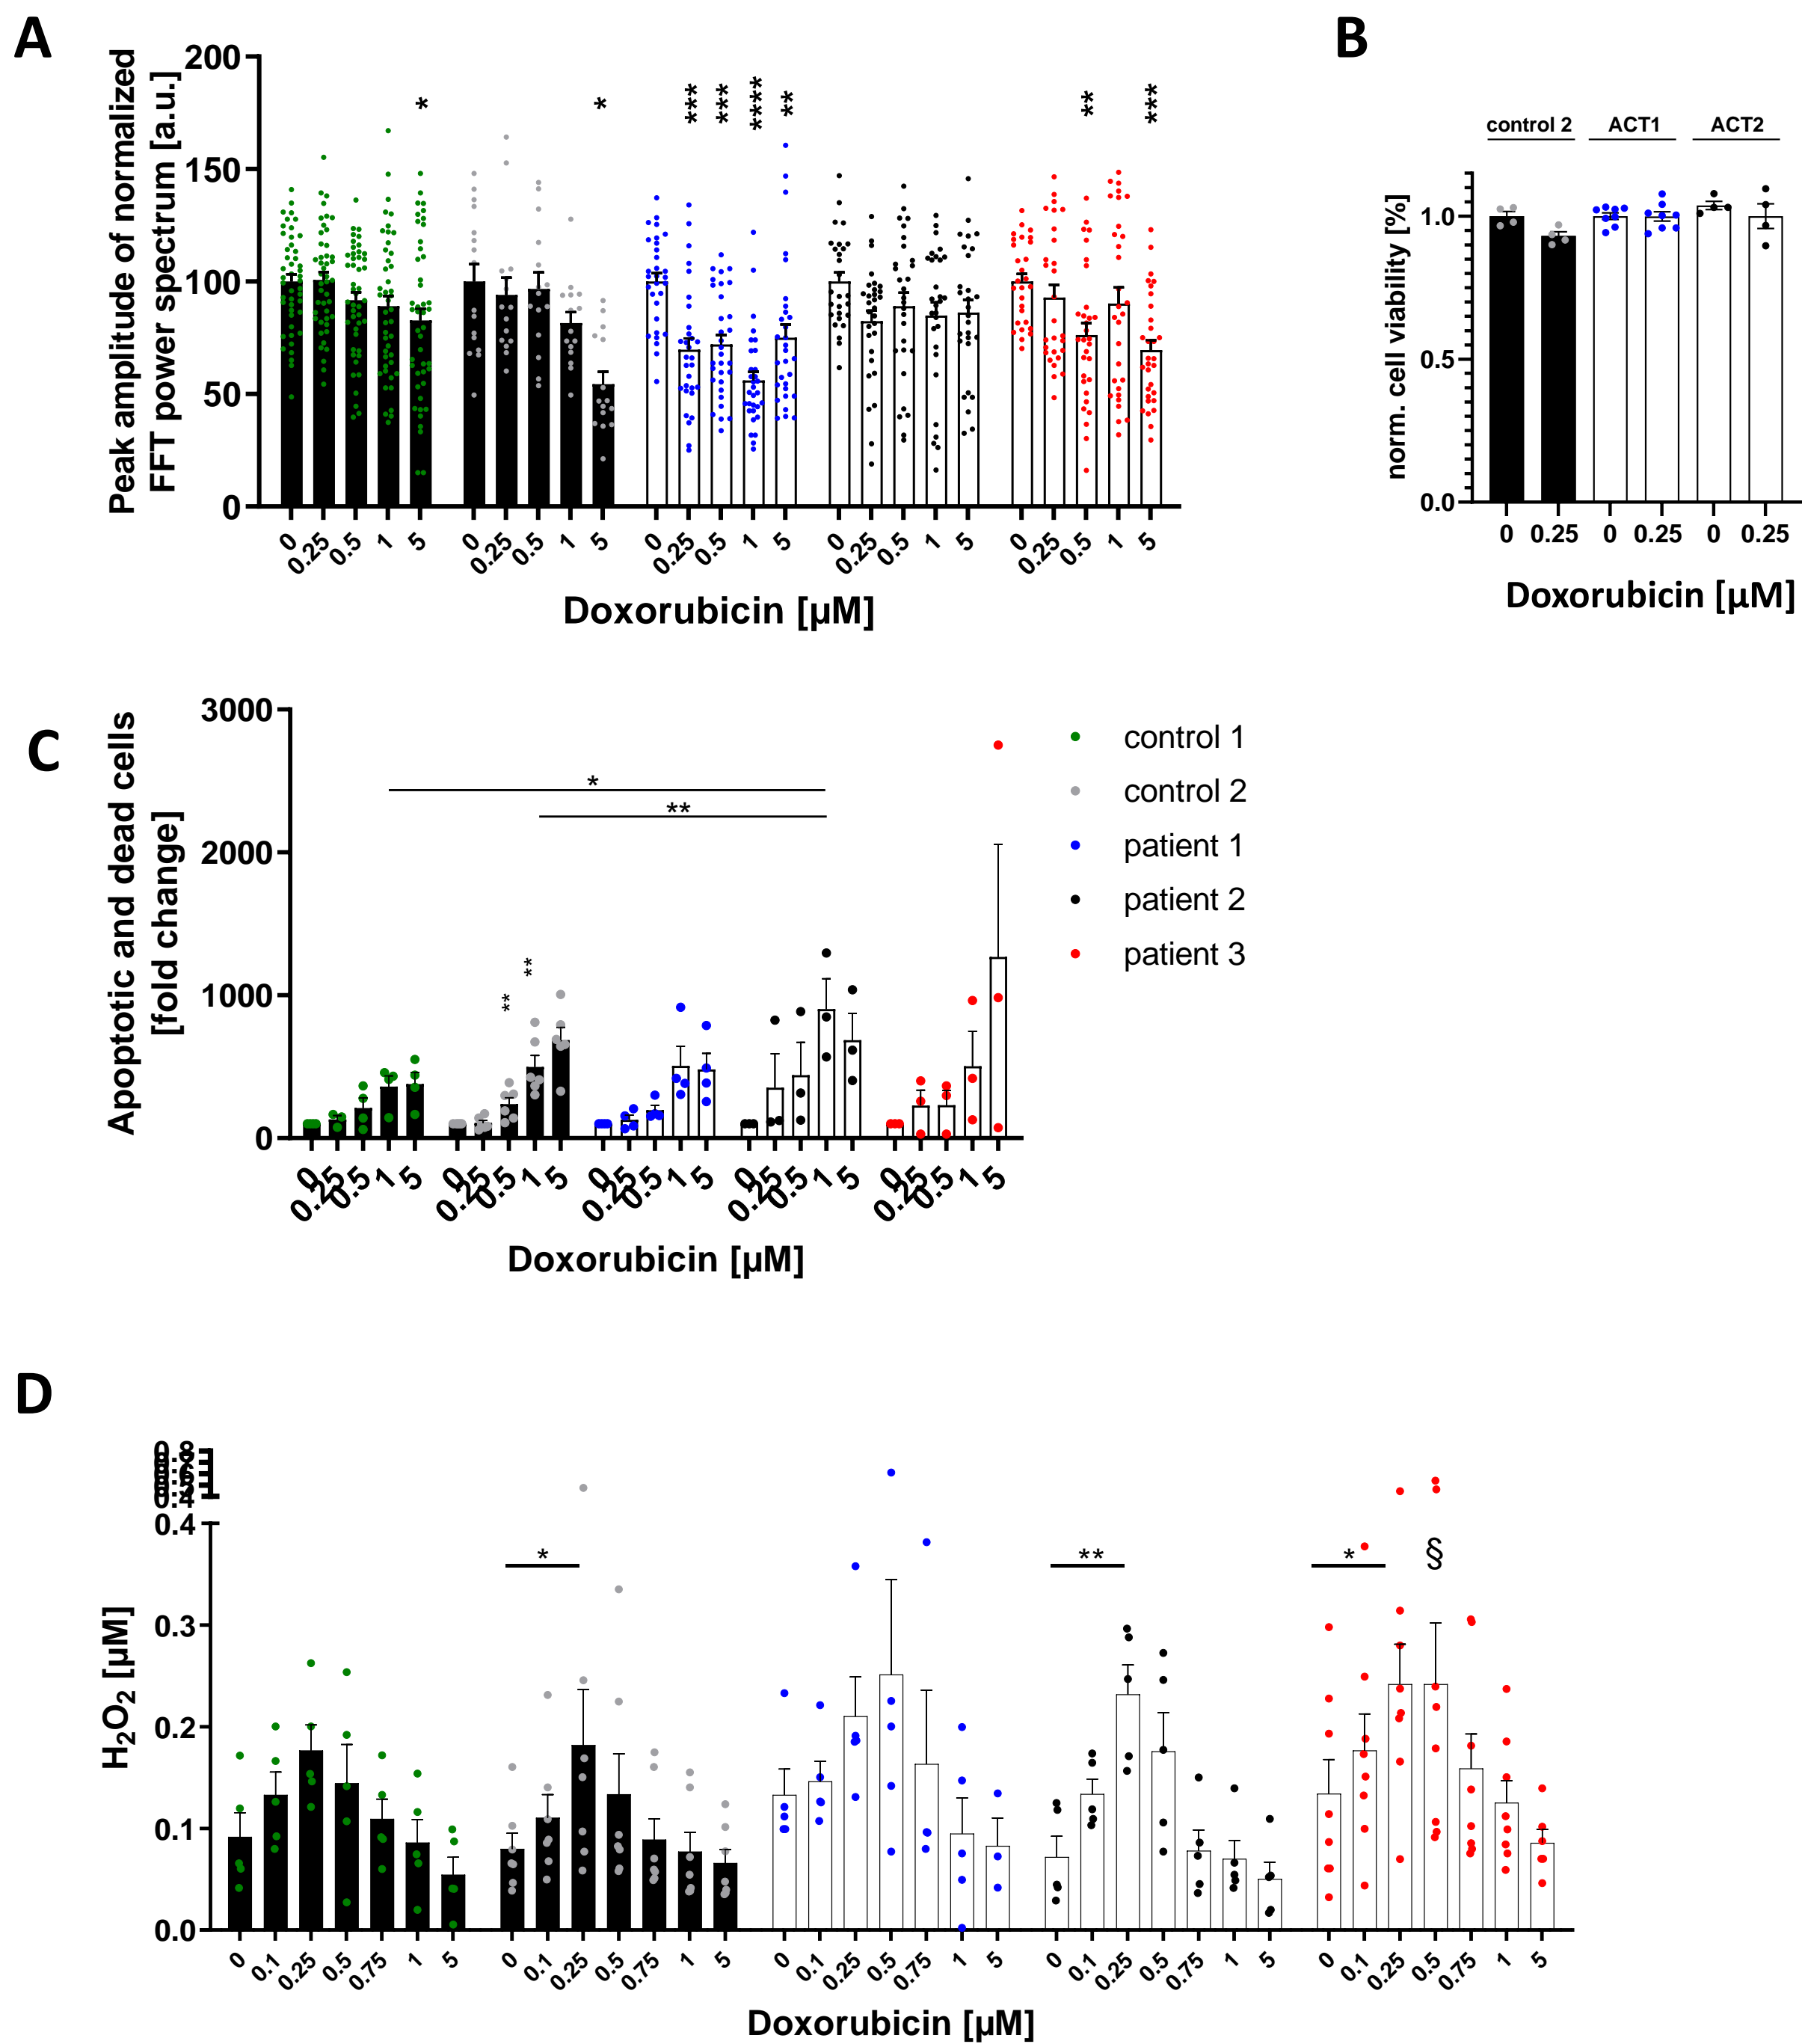



Supplementary Figure 7: EHM

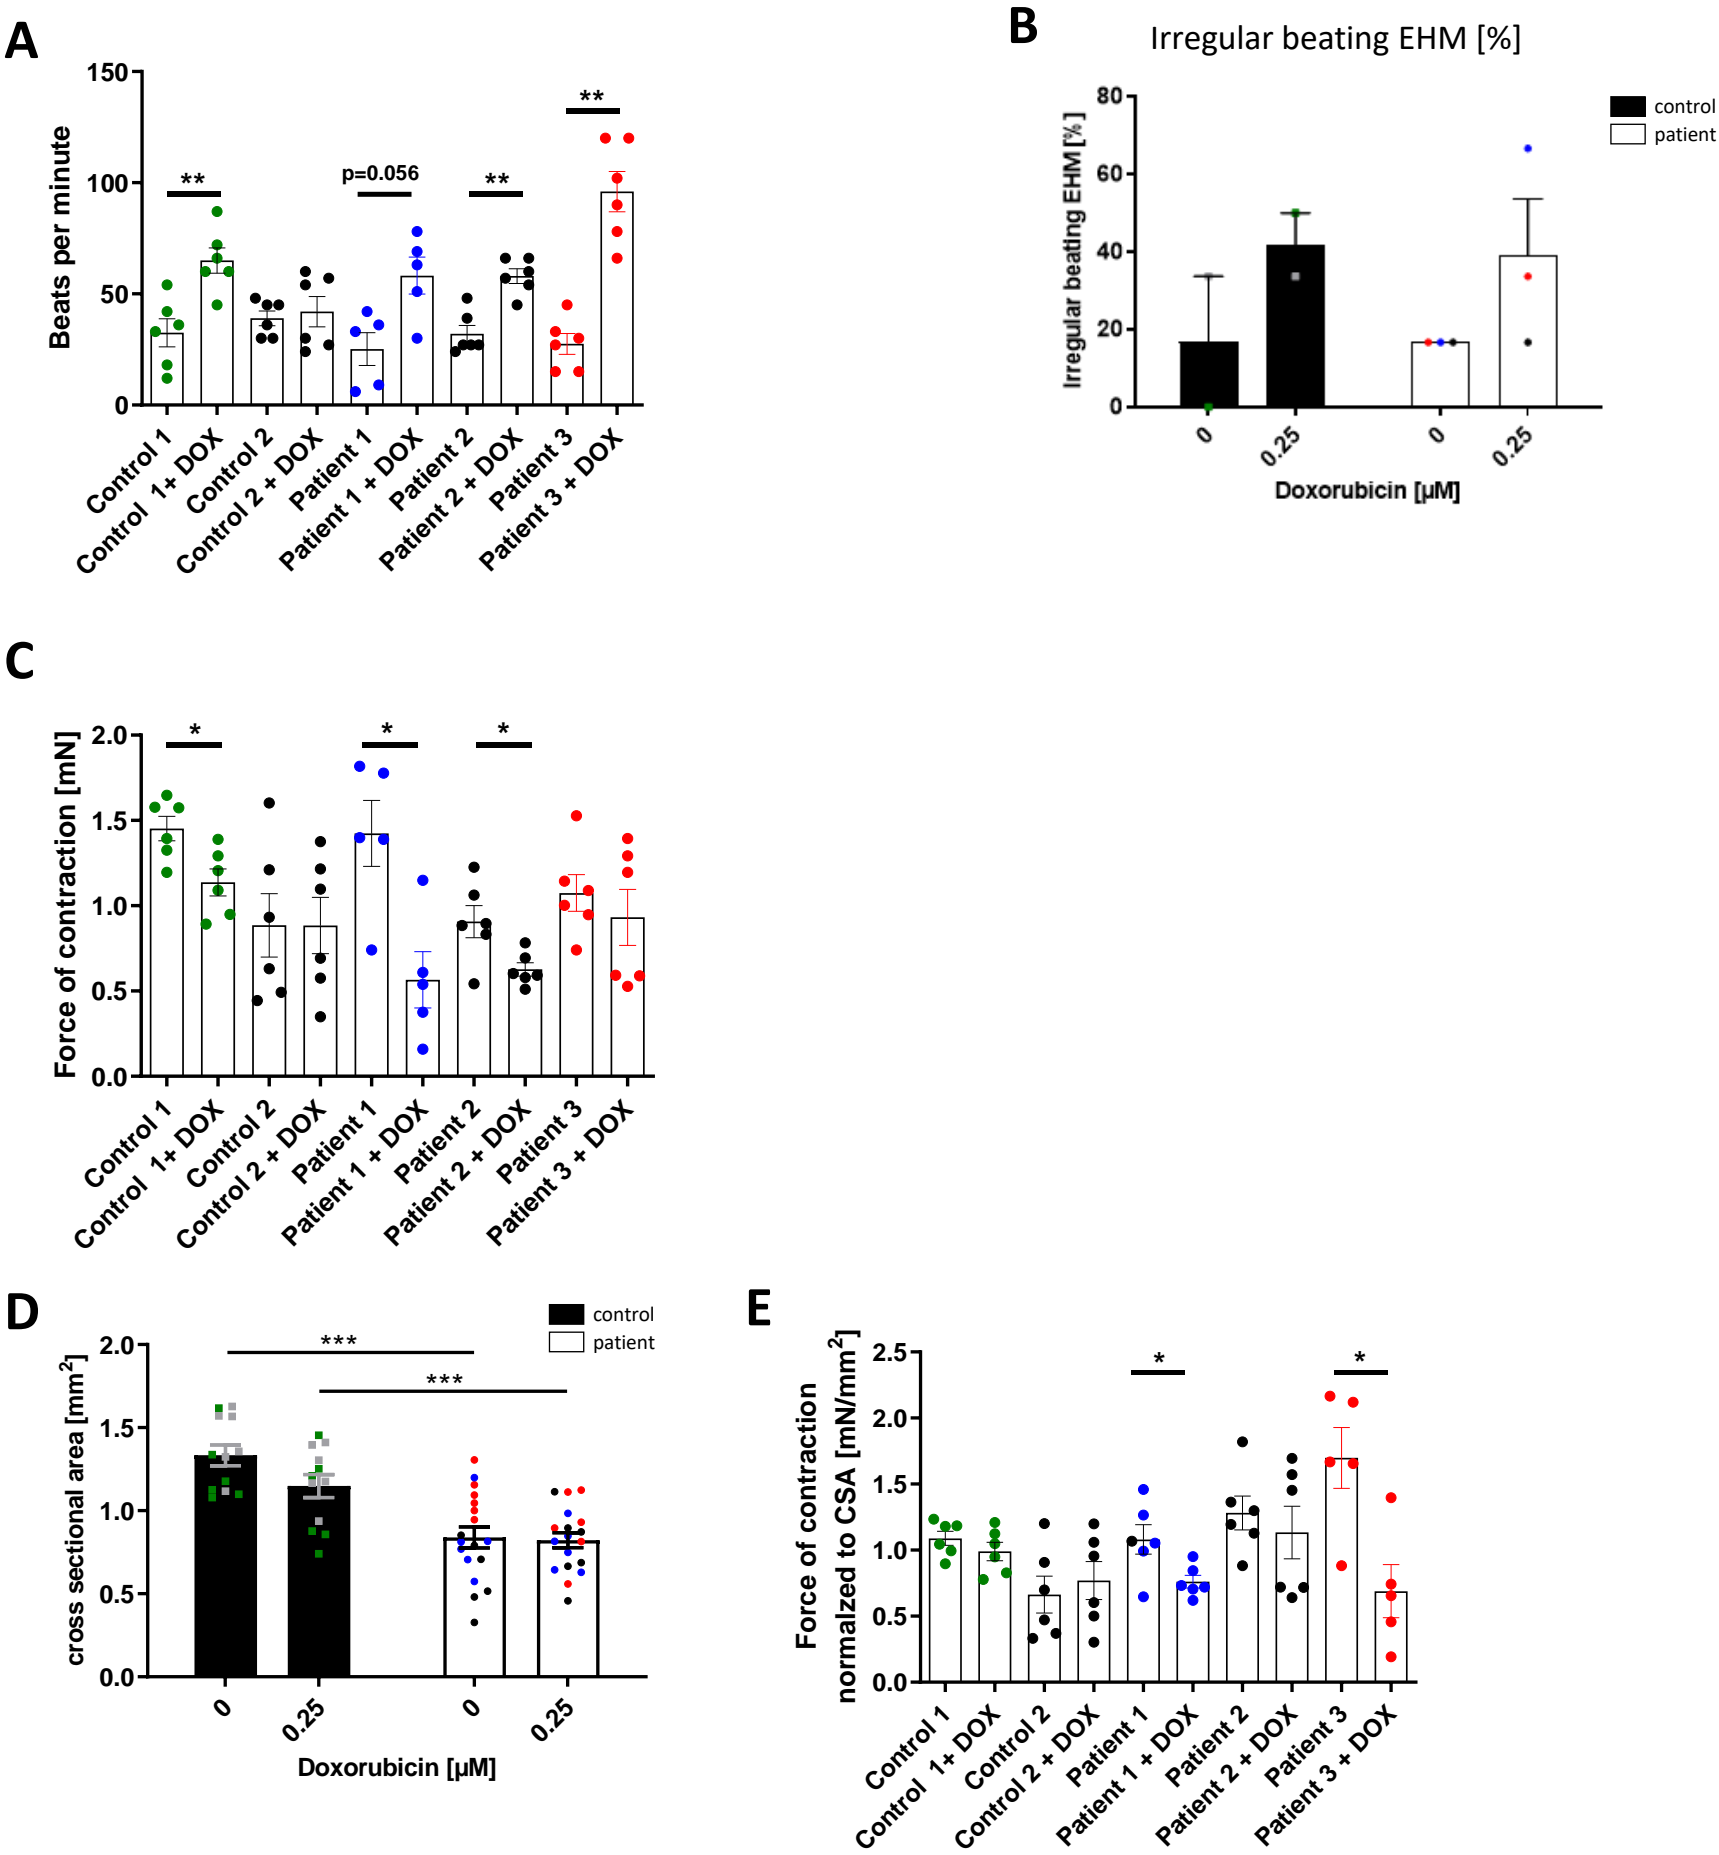

Supplementary Figure 8:

A

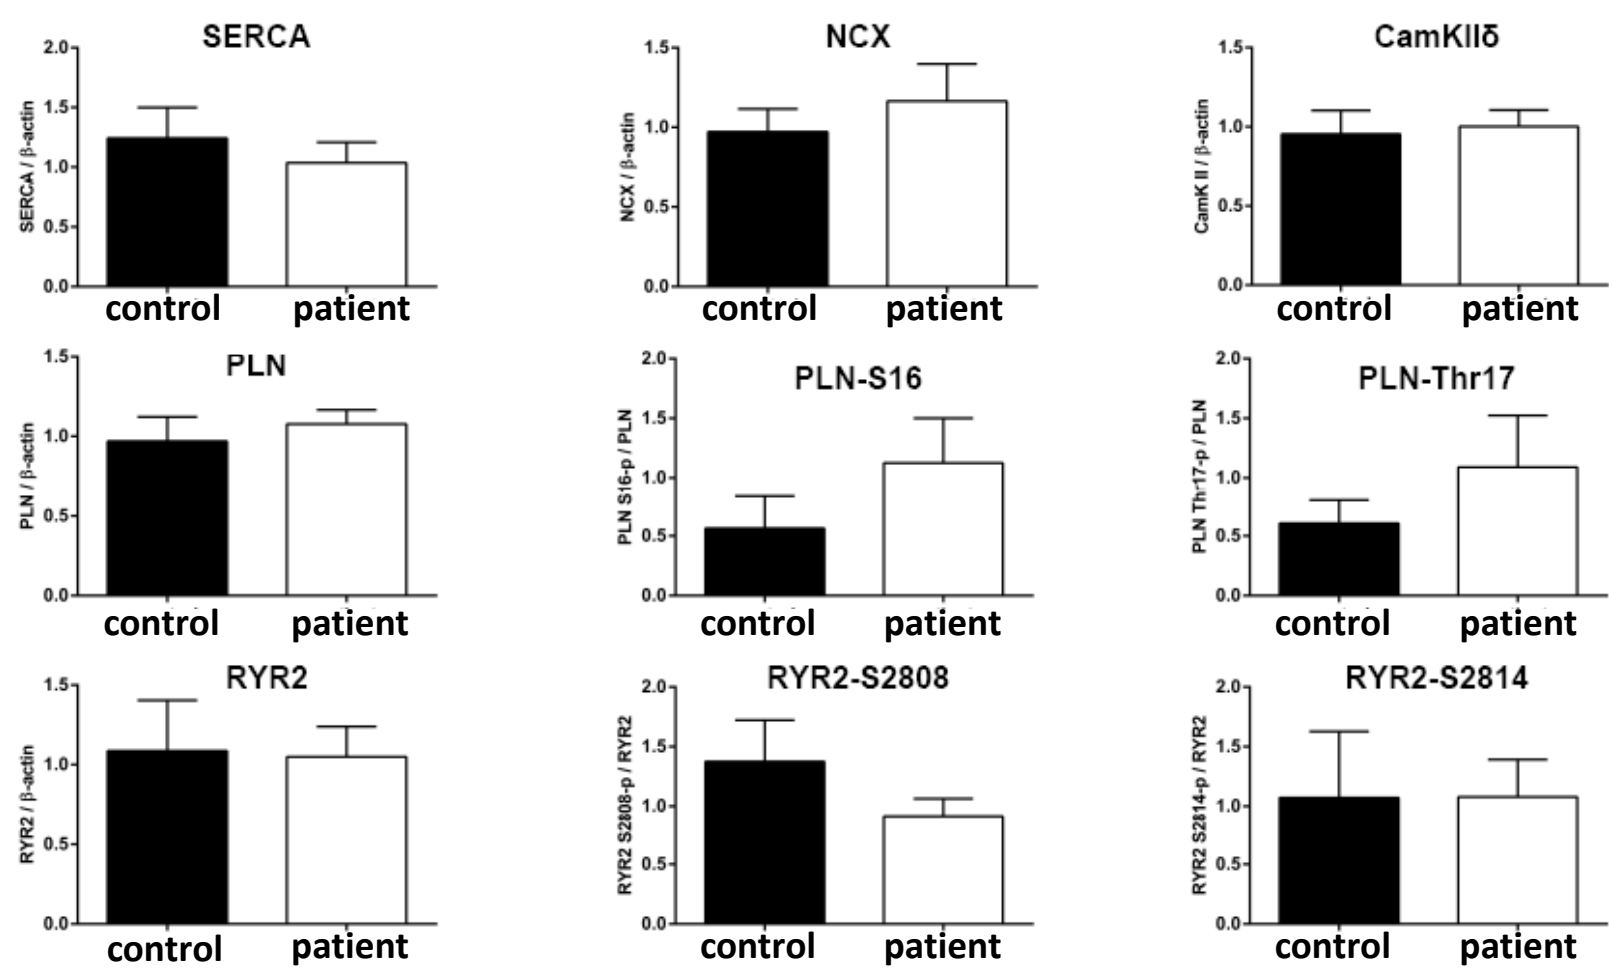

B

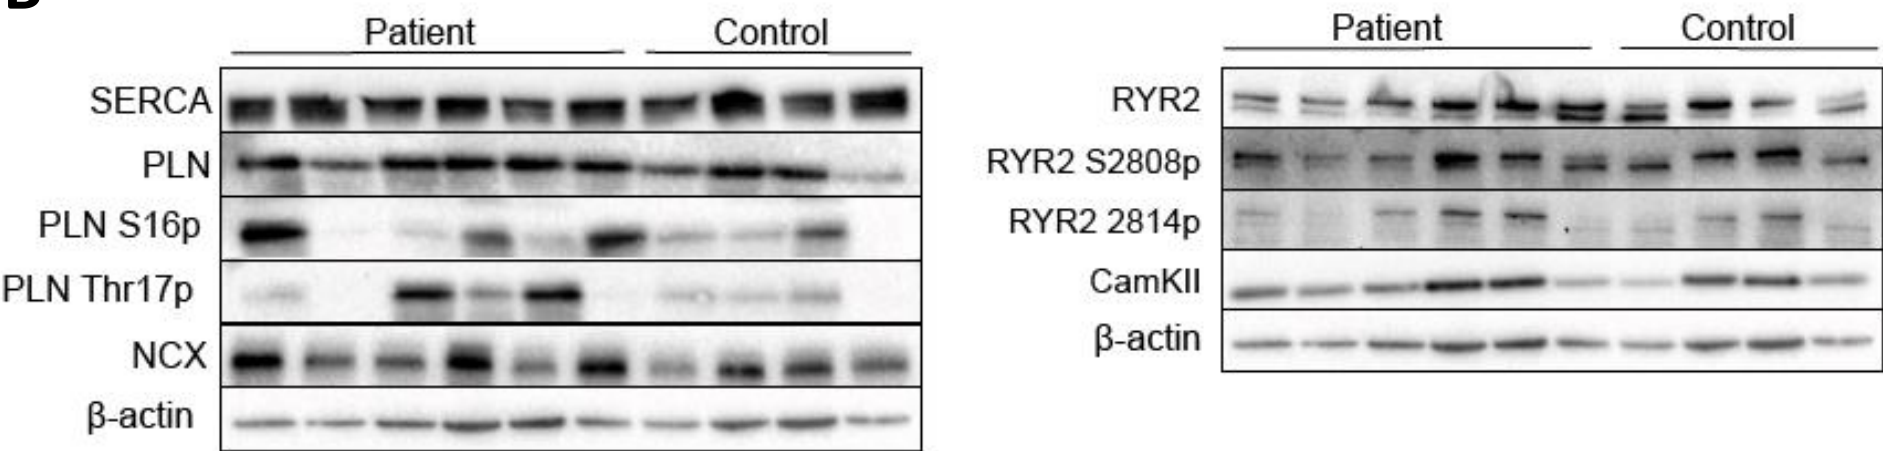

Supplement: MOESM9 [file 395_2022_918_MOESM9_ESM.pdf › 395_2022_918_MOESM9_ESM.pdf]
