# Supplementary material for: Doxorubicin induces cardiotoxicity in a pluripotent stem cell model of aggressive B cell lymphoma cancer patients
Source: Basic Res Cardiol. 2022 Mar 8;117(1):13. doi: 10.1007/s00395-022-00918-7 (PMC8904375; doi:10.1007/s00395-022-00918-7)
Supplement: Supplementary file 2 — Supplementary file2 (XLS 146 KB) [file 395_2022_918_MOESM2_ESM.xls]

## Sheet: ClueGO Results
GOID	GOTerm	Ontology Source	Term PValue	Term PValue Corrected with Bonferroni step down	Group PValue	Group PValue Corrected with Bonferroni step down	GOLevels	GOGroups	% Associated Genes	Nr. Genes	Associated Genes Found
GO:0060976	coronary vasculature development	GO_BiologicalProcess-EBI-UniProt-GOA_27.02.2019_00h00	1.78864e-06	0.00311402	1.78864e-06	1.78864e-06	[4, 5, 6, 7, 8, 9]	Group00	23.2143	13	[ADAMTS6, APLN, APLNR, ARID2, CPLANE1, HERPUD1, LTBP1, MEGF8, MYOCD, PDGFRB, PLXND1, SETD2, SGCD]
GO:0048523	negative regulation of cellular process	GO_BiologicalProcess-EBI-UniProt-GOA_27.02.2019_00h00	6.3065e-07	0.00110679	6.3065e-07	2.5226e-06	[2, 3, 4]	Group01	6.00214	336	[AARS, ABAT, ACKR3, ACTC1, ACVRL1, ADAMTS12, ADCY6, ADD3, ADGRA2, ADGRF5, AGO1, AGO4, ANGPT1, ANGPT2, ANK2, ANXA1, ANXA6, APLN, APLNR, APP, ARHGDIB, ARID2, ARRB1, ASPM, ASPN, ATAD2, ATM, ATP1A2, ATRNL1, AURKB, BCHE, BCL2, BCL6B, BICC1, BIRC5, BLM, BMF, BNIP3L, BRCA2, BRD8, BRIP1, BUB1, BUB1B, C18orf54, CARD8, CASQ1, CASTOR3, CBLB, CBX5, CCNA2, CCNB1, CCNF, CD34, CDC20, CDC45, CDK1, CDYL2, CENPF, …
GO:0050906	detection of stimulus involved in sensory perception	GO_BiologicalProcess-EBI-UniProt-GOA_27.02.2019_00h00	1.11568e-06	0.00195132	1.11568e-06	3.34703e-06	[3, 5]	Group02	1.05448	6	[CCDC6, COL11A1, EBF1, FYN, LXN, PIEZO2]
GO:0051270	regulation of cellular component movement	GO_BiologicalProcess-EBI-UniProt-GOA_27.02.2019_00h00	6.02924e-07	0.00105874	6.02924e-07	3.01462e-06	[3, 4]	Group03	7.94543	99	[ACKR3, ACVRL1, ADGRA2, ANGPT1, ANGPT2, ANK2, ANXA1, APP, ARHGAP18, ARHGDIB, ARID2, ATM, ATP1A2, BCL2, BRD8, CCDC6, CCNA2, CNN2, CTNNA3, CTNND1, DLC1, DLG1, DOCK1, DOCK4, DPYSL3, DYSF, EDN1, ELP1, ETS1, EVL, FBXO5, FN1, FYN, GNAI2, GPR173, GTSE1, HGF, HMGB1, IGFBP5, INSR, ITGA4, JAK2, KDR, KIF14, KIF20B, LAMB1, LDB2, LIMCH1, MCAM, MCTP1, MECOM, MEGF8, MOK, MYBPC3, MYOCD, NEXN, OCRL, PBK, PDGFD, P…
GO:0006260	DNA replication	GO_BiologicalProcess-EBI-UniProt-GOA_27.02.2019_00h00	4.71841e-07	0.00083044	4.71841e-07	2.83104e-06	[5, 6, 7]	Group04	11.1702	42	[ACVRL1, ATM, BLM, BRCA2, BRIP1, CCNA2, CDC45, CDK1, CDK2AP1, CHAF1A, CHEK1, CLSPN, DBF4, DTL, EXO1, FAM111A, FANCD2, FBXO5, FILIP1L, GINS1, MCM2, MCM3, MCM5, MCM6, MCM7, MSH3, NBN, NFIA, NFIB, NFIC, NFIX, ORC6, PDS5A, POLE, POLK, POLQ, RRM2, SFRP1, STON1, THOC1, TICRR, WRN]
GO:0032835	glomerulus development	GO_BiologicalProcess-EBI-UniProt-GOA_27.02.2019_00h00	2.37337e-06	0.00412492	1.29036e-06	2.58072e-06	[3, 4, 6, 7, 8, 9]	Group05	18.8235	16	[ACTA2, ANGPT1, ANGPT2, BCL2, CCDC6, CD34, HEYL, LGR4, NOTCH3, PDGFD, PDGFRB, PECAM1, PLCE1, PODXL, SULF1, TEK]
GO:0061440	kidney vasculature development	GO_BiologicalProcess-EBI-UniProt-GOA_27.02.2019_00h00	3.73136e-06	0.00645899	1.29036e-06	2.58072e-06	[5, 6, 7, 8, 9]	Group05	28.5714	10	[ACTA2, ANGPT1, ANGPT2, CD34, NOTCH3, PDGFD, PDGFRB, PECAM1, PKD2, TEK]
GO:0061640	cytoskeleton-dependent cytokinesis	GO_BiologicalProcess-EBI-UniProt-GOA_27.02.2019_00h00	3.4436e-07	0.000607796	3.4436e-07	2.41052e-06	[4, 5]	Group06	16.5414	22	[ANLN, AURKB, BRCA2, CEP55, CIT, CKAP2, CRIP2, ECT2, FANCD2, FN1, INCENP, KIF20A, KIF20B, KIF23, KIF4A, NUSAP1, PLK1, RACGAP1, SH3YL1, SNX33, SNX9, STMN1]
GO:0000281	mitotic cytokinesis	GO_BiologicalProcess-EBI-UniProt-GOA_27.02.2019_00h00	2.24666e-08	4.00804e-05	3.4436e-07	2.41052e-06	[4, 5, 6]	Group06	20.8333	20	[ANLN, BRCA2, CEP55, CIT, CKAP2, CRIP2, ECT2, FANCD2, INCENP, KIF20A, KIF20B, KIF23, KIF4A, NUSAP1, PLK1, RACGAP1, SH3YL1, SNX33, SNX9, STMN1]
GO:0006996	organelle organization	GO_BiologicalProcess-EBI-UniProt-GOA_27.02.2019_00h00	1.15204e-20	2.12782e-17	1.25817e-21	2.13889e-20	[3]	Group07	7.47025	339	[ACOX2, ACTA1, ACTB, ACTC1, ACTG1, ADD3, AGO4, AKAP13, ANGPT2, ANK2, ANKRD28, ANLN, ANP32E, ANXA1, ARHGAP18, ARHGDIB, ARID2, ARRB1, ASPM, ATAD2, ATM, ATRNL1, AURKB, BAZ2B, BBOF1, BBS9, BCL2, BIRC5, BLM, BMF, BNIP3L, BRCA2, BRD8, BRIP1, BUB1, BUB1B, CALCOCO2, CAP2, CASQ1, CC2D2A, CCDC113, CCDC6, CCDC69, CCNA2, CCNB1, CCNF, CCNG2, CCNY, CD34, CDC20, CDC27, CDC45, CDCA5, CDCA8, CDK1, CDKL5, CENPC, C…
GO:0022607	cellular component assembly	GO_BiologicalProcess-EBI-UniProt-GOA_27.02.2019_00h00	2.50996e-14	4.60828e-11	1.25817e-21	2.13889e-20	[3]	Group07	7.33793	266	[ACAT2, ACKR3, ACTA1, ACTB, ACTC1, ACTG1, ACVRL1, ADD3, AGO1, AGO4, AKAP13, ANGPT1, ANK2, ANKRD28, ANLN, ANXA6, APP, ARHGAP18, ARRB1, ASPM, ATM, AURKB, BBOF1, BBS9, BCL2, BIRC5, BLM, BMF, BRD8, BRIP1, C1QTNF6, CASQ1, CC2D2A, CCDC113, CCDC69, CCNB1, CD34, CDC20, CDC45, CDH19, CDH5, CDK1, CDKL5, CENPC, CENPE, CENPF, CENPK, CENPU, CEP290, CEP295, CEP57, CHAF1A, CLGN, CLIP3, CLUAP1, CNKSR3, COL1A2, C…
GO:0070925	organelle assembly	GO_BiologicalProcess-EBI-UniProt-GOA_27.02.2019_00h00	1.14165e-11	2.07438e-08	1.25817e-21	2.13889e-20	[4]	Group07	9.68054	100	[ACTA1, ACTC1, ACTG1, AKAP13, ANLN, ARRB1, ASPM, AURKB, BBOF1, BBS9, BIRC5, BRD8, CASQ1, CC2D2A, CCDC113, CCDC69, CD34, CDC20, CDK1, CDKL5, CENPC, CENPE, CENPF, CENPK, CEP290, CEP295, CEP57, CHAF1A, CLUAP1, CPLANE1, DISC1, DLC1, DNALI1, DUSP26, DYNC2H1, DYNC2LI1, EDN1, EHD2, FBXO5, FMNL3, FN1, HAUS4, HSPB11, ICK, IFT172, KIF11, KIF23, KIF3C, KIF4A, KIFC1, KNL1, LDB3, LMOD1, LMOD2, LMOD3, MYBL2, M…
GO:0051276	chromosome organization	GO_BiologicalProcess-EBI-UniProt-GOA_27.02.2019_00h00	6.25224e-11	1.13166e-07	6.25224e-11	5.00179e-10	[4]	Group08	8.54701	130	[ACTB, AGO4, ANP32E, ANXA1, ARID2, ARRB1, ASPM, ATAD2, ATM, ATRNL1, AURKB, BAZ2B, BLM, BRCA2, BRD8, BRIP1, BUB1, BUB1B, CCNA2, CCNB1, CCNY, CDC20, CDC27, CDC45, CDCA5, CDCA8, CDK1, CENPC, CENPE, CENPF, CENPK, CENPU, CHAF1A, CHEK1, CRIP2, CTDSPL, DCHS1, DLGAP5, DPF3, DSN1, EPC2, EXO1, FANCD2, FBXO5, GINS1, HDAC1, HECW2, HIST1H1B, HIST1H1D, HIST1H2AJ, HIST1H2BI, HIST1H3B, HIST1H3C, HIST1H3G, HJURP,…
GO:0071103	DNA conformation change	GO_BiologicalProcess-EBI-UniProt-GOA_27.02.2019_00h00	2.26816e-07	0.000400558	6.25224e-11	5.00179e-10	[5]	Group08	11.3208	42	[ANXA1, BLM, BRIP1, CCNB1, CDC45, CDCA5, CDK1, CENPC, CENPK, CENPU, CHAF1A, CTDSPL, GINS1, HIST1H1B, HIST1H1D, HIST1H2BI, HIST1H3B, HIST1H3C, HIST1H3G, HJURP, HMGB1, KNL1, MCM2, MCM6, MCM7, MIS18BP1, MYL4, NBN, NCAPD3, NCAPG, NCAPG2, NCAPH, NUSAP1, PXDNL, S100A4, SHPRH, SMC2, SMC4, TOP2A, TOP2B, TPR, WRN]
GO:0006323	DNA packaging	GO_BiologicalProcess-EBI-UniProt-GOA_27.02.2019_00h00	9.47108e-07	0.00165933	6.25224e-11	5.00179e-10	[6]	Group08	12.5506	31	[CCNB1, CDCA5, CDK1, CENPC, CENPK, CENPU, CHAF1A, CTDSPL, HIST1H1B, HIST1H1D, HIST1H2BI, HIST1H3B, HIST1H3C, HIST1H3G, HJURP, KNL1, MCM2, MCM7, MIS18BP1, NCAPD3, NCAPG, NCAPG2, NCAPH, NUSAP1, PXDNL, S100A4, SHPRH, SMC2, SMC4, TOP2A, TPR]
GO:0030261	chromosome condensation	GO_BiologicalProcess-EBI-UniProt-GOA_27.02.2019_00h00	1.64403e-07	0.000290664	6.25224e-11	5.00179e-10	[7]	Group08	25.9259	14	[CCNB1, CDCA5, CDK1, HIST1H1B, HIST1H1D, NCAPD3, NCAPG, NCAPG2, NCAPH, NUSAP1, PXDNL, SMC2, SMC4, TOP2A]
GO:0051983	regulation of chromosome segregation	GO_BiologicalProcess-EBI-UniProt-GOA_27.02.2019_00h00	2.00818e-13	3.67698e-10	5.54744e-16	7.21168e-15	[3, 4]	Group09	22.963	31	[ATM, AURKB, BUB1, BUB1B, CCNB1, CDC20, CDC27, CDCA5, CENPE, CENPF, CRIP2, DLGAP5, ECT2, FBXO5, HECW2, KIF2C, KNSTRN, MAD2L1, MKI67, NDC80, NEK2, PLK1, RACGAP1, RIOK2, SIRT2, SLF1, SPAG5, TACC3, TPR, TRIP13, TTK]
GO:0008608	attachment of spindle microtubules to kinetochore	GO_BiologicalProcess-EBI-UniProt-GOA_27.02.2019_00h00	4.58273e-09	8.23058e-06	5.54744e-16	7.21168e-15	[3, 4, 5]	Group09	33.3333	14	[AURKB, CCNB1, CENPC, CENPE, ECT2, KIF2C, KNL1, KNSTRN, NDC80, NEK2, NUF2, RACGAP1, SIRT2, SPAG5]
GO:0051988	regulation of attachment of spindle microtubules to kinetochore	GO_BiologicalProcess-EBI-UniProt-GOA_27.02.2019_00h00	1.44747e-06	0.0025244	5.54744e-16	7.21168e-15	[4, 5, 6]	Group09	50	7	[CCNB1, ECT2, KNSTRN, NEK2, RACGAP1, SIRT2, SPAG5]
GO:0007080	mitotic metaphase plate congression	GO_BiologicalProcess-EBI-UniProt-GOA_27.02.2019_00h00	3.83307e-06	0.00663121	5.54744e-16	7.21168e-15	[4, 5, 6, 7, 8]	Group09	23.5294	12	[CCNB1, CDCA5, CDCA8, CENPC, CENPE, KIF14, KIF18A, KIF22, KIF2C, KIFC1, NDC80, NUF2]
GO:0006996	organelle organization	GO_BiologicalProcess-EBI-UniProt-GOA_27.02.2019_00h00	1.15204e-20	2.12782e-17	3.91477e-19	5.87216e-18	[3]	Group10	7.47025	339	[ACOX2, ACTA1, ACTB, ACTC1, ACTG1, ADD3, AGO4, AKAP13, ANGPT2, ANK2, ANKRD28, ANLN, ANP32E, ANXA1, ARHGAP18, ARHGDIB, ARID2, ARRB1, ASPM, ATAD2, ATM, ATRNL1, AURKB, BAZ2B, BBOF1, BBS9, BCL2, BIRC5, BLM, BMF, BNIP3L, BRCA2, BRD8, BRIP1, BUB1, BUB1B, CALCOCO2, CAP2, CASQ1, CC2D2A, CCDC113, CCDC6, CCDC69, CCNA2, CCNB1, CCNF, CCNG2, CCNY, CD34, CDC20, CDC27, CDC45, CDCA5, CDCA8, CDK1, CDKL5, CENPC, C…
GO:0022607	cellular component assembly	GO_BiologicalProcess-EBI-UniProt-GOA_27.02.2019_00h00	2.50996e-14	4.60828e-11	3.91477e-19	5.87216e-18	[3]	Group10	7.33793	266	[ACAT2, ACKR3, ACTA1, ACTB, ACTC1, ACTG1, ACVRL1, ADD3, AGO1, AGO4, AKAP13, ANGPT1, ANK2, ANKRD28, ANLN, ANXA6, APP, ARHGAP18, ARRB1, ASPM, ATM, AURKB, BBOF1, BBS9, BCL2, BIRC5, BLM, BMF, BRD8, BRIP1, C1QTNF6, CASQ1, CC2D2A, CCDC113, CCDC69, CCNB1, CD34, CDC20, CDC45, CDH19, CDH5, CDK1, CDKL5, CENPC, CENPE, CENPF, CENPK, CENPU, CEP290, CEP295, CEP57, CHAF1A, CLGN, CLIP3, CLUAP1, CNKSR3, COL1A2, C…
GO:0051128	regulation of cellular component organization	GO_BiologicalProcess-EBI-UniProt-GOA_27.02.2019_00h00	2.28329e-10	4.12362e-07	3.91477e-19	5.87216e-18	[3, 4]	Group10	7.16418	216	[ACVRL1, ADCY6, ADD3, AGO4, AKAP13, ANGPT1, ANLN, ANXA1, APLN, APP, ARHGAP18, ARHGAP33, ARHGDIB, ARRB1, ASPM, ATAD2, ATM, ATRNL1, AURKB, BCL2, BMF, BNIP3L, BUB1, BUB1B, CALCOCO2, CCDC6, CCNA2, CCNB1, CCNF, CCNG2, CDC20, CDC27, CDC45, CDCA5, CDK19, CDKL5, CENPE, CENPF, CEP295, CEP57, CEP85, CHEK1, CIT, CKAP2, CLIP3, CPNE5, CRIP2, CTNND1, DENND5A, DLC1, DLG1, DLGAP5, DOCK1, DPYSL2, DPYSL3, DTL, DUS…
GO:0007010	cytoskeleton organization	GO_BiologicalProcess-EBI-UniProt-GOA_27.02.2019_00h00	3.2172e-24	5.95825e-21	3.91477e-19	5.87216e-18	[4]	Group10	10.6042	172	[ACTA1, ACTB, ACTC1, ACTG1, ADD3, AKAP13, ANK2, ANLN, ANXA1, ARHGAP18, ARHGDIB, ARRB1, ASPM, ATRNL1, AURKB, BCL2, BIRC5, BRCA2, CAP2, CASQ1, CC2D2A, CCDC6, CCDC69, CCNB1, CCNF, CDC20, CDK1, CENPE, CEP295, CEP57, CEP85, CGNL1, CHEK1, CIT, CKAP2, CLIP3, CNN2, CRIP2, CTNND1, DIAPH2, DIAPH3, DISC1, DLC1, DLG1, DNALI1, DOCK1, DPYSL2, DPYSL3, ECT2, EDN1, EEF1A2, EHD2, ELMO1, EPB41L2, EPS8, EVL, FANCD2,…
GO:0033043	regulation of organelle organization	GO_BiologicalProcess-EBI-UniProt-GOA_27.02.2019_00h00	2.70903e-13	4.95212e-10	3.91477e-19	5.87216e-18	[4, 5]	Group10	8.82532	145	[ADD3, AKAP13, ANLN, ANXA1, ARHGAP18, ARHGDIB, ARRB1, ASPM, ATAD2, ATM, ATRNL1, AURKB, BCL2, BMF, BNIP3L, BUB1, BUB1B, CALCOCO2, CCNA2, CCNB1, CCNF, CCNG2, CDC20, CDC27, CDC45, CDCA5, CDKL5, CENPE, CENPF, CEP295, CEP85, CHEK1, CIT, CKAP2, CLIP3, CRIP2, DLC1, DLG1, DLGAP5, DUSP26, DYNC2LI1, ECT2, EDN1, EEF1A2, EHD2, EPS8, EVL, FBXO5, FMNL3, FN1, GOLPH3, GRIK2, HCLS1, HECW2, HGF, HIST1H1B, HIST1H1D…
GO:0051129	negative regulation of cellular component organization	GO_BiologicalProcess-EBI-UniProt-GOA_27.02.2019_00h00	1.85142e-06	0.00322146	9.20502e-14	1.01255e-12	[3, 4, 5]	Group11	8.35118	78	[ACVRL1, ADCY6, ADD3, ASPM, ATAD2, ATM, ATRNL1, AURKB, BUB1, BUB1B, CCNB1, CCNF, CDC20, CENPF, CHEK1, CKAP2, CLIP3, CRIP2, DENND5A, DLC1, DPYSL3, DUSP26, EFNB3, EPS8, EVL, FBXO5, FMNL3, FYN, GBP1, HGF, HIST1H1B, HIST1H1D, HMGB1, KIF14, LMOD1, LMOD2, LMOD3, LRP4, MAD2L1, MCM2, MCM7, MCTP1, MINAR1, NBN, NCAPG, NDC80, NEK2, NUPR1, OCRL, PLK1, PLP1, POSTN, PRKN, PTPN9, PTPRS, RAPGEF3, SEMA3A, SEMA4C,…
GO:0033043	regulation of organelle organization	GO_BiologicalProcess-EBI-UniProt-GOA_27.02.2019_00h00	2.70903e-13	4.95212e-10	9.20502e-14	1.01255e-12	[4, 5]	Group11	8.82532	145	[ADD3, AKAP13, ANLN, ANXA1, ARHGAP18, ARHGDIB, ARRB1, ASPM, ATAD2, ATM, ATRNL1, AURKB, BCL2, BMF, BNIP3L, BUB1, BUB1B, CALCOCO2, CCNA2, CCNB1, CCNF, CCNG2, CDC20, CDC27, CDC45, CDCA5, CDKL5, CENPE, CENPF, CEP295, CEP85, CHEK1, CIT, CKAP2, CLIP3, CRIP2, DLC1, DLG1, DLGAP5, DUSP26, DYNC2LI1, ECT2, EDN1, EEF1A2, EHD2, EPS8, EVL, FBXO5, FMNL3, FN1, GOLPH3, GRIK2, HCLS1, HECW2, HGF, HIST1H1B, HIST1H1D…
GO:0010639	negative regulation of organelle organization	GO_BiologicalProcess-EBI-UniProt-GOA_27.02.2019_00h00	8.30931e-07	0.00145745	9.20502e-14	1.01255e-12	[4, 5, 6]	Group11	9.82987	52	[ADD3, ASPM, ATAD2, ATM, ATRNL1, AURKB, BUB1, BUB1B, CCNB1, CCNF, CDC20, CENPF, CHEK1, CKAP2, CLIP3, CRIP2, DLC1, DUSP26, EPS8, FBXO5, FMNL3, HGF, HIST1H1B, HIST1H1D, LMOD1, LMOD2, LMOD3, MAD2L1, MCM2, MCM7, NBN, NCAPG, NDC80, NEK2, NUPR1, PLK1, PRKN, SHANK3, STMN1, STON1, SYT4, TMOD2, TMSB4X, TOP2A, TPR, TRIP13, TTBK2, TTK, TUBB, TWF1, VAT1, XRN1]
GO:0033046	negative regulation of sister chromatid segregation	GO_BiologicalProcess-EBI-UniProt-GOA_27.02.2019_00h00	1.05919e-06	0.00185359	9.20502e-14	1.01255e-12	[4, 5, 6, 7, 8]	Group11	21.1268	15	[ATM, AURKB, BUB1, BUB1B, CCNB1, CDC20, CENPF, CRIP2, FBXO5, MAD2L1, NDC80, PLK1, TPR, TRIP13, TTK]
GO:0045839	negative regulation of mitotic nuclear division	GO_BiologicalProcess-EBI-UniProt-GOA_27.02.2019_00h00	3.12284e-06	0.00541813	9.20502e-14	1.01255e-12	[4, 5, 6, 7, 8]	Group11	19.4805	15	[ATM, AURKB, BUB1, BUB1B, CCNB1, CDC20, CENPF, CHEK1, FBXO5, MAD2L1, NDC80, PLK1, TPR, TRIP13, TTK]
GO:0045841	negative regulation of mitotic metaphase/anaphase transition	GO_BiologicalProcess-EBI-UniProt-GOA_27.02.2019_00h00	9.7998e-08	0.000173358	9.20502e-14	1.01255e-12	[6, 7, 8, 9, 10, 11, 12]	Group11	26.9231	14	[ATM, AURKB, BUB1, BUB1B, CCNB1, CDC20, CENPF, FBXO5, MAD2L1, NDC80, PLK1, TPR, TRIP13, TTK]
GO:0023051	regulation of signaling	GO_BiologicalProcess-EBI-UniProt-GOA_27.02.2019_00h00	3.10196e-06	0.0053881	2.36846e-12	2.13162e-11	[2, 3]	Group12	6.13303	272	[ABAT, ACKR3, ACVRL1, ADAMTS12, ADGRA2, AFAP1L2, AGO1, AKAP13, ANGPT1, ANK2, ANXA1, APLN, APLNR, APP, ARHGAP11A, ARHGAP11B, ARHGAP18, ARHGAP19, ARHGAP29, ARHGAP33, ARHGDIB, ARHGEF25, ARRB1, ASPM, ASPN, ATM, ATP1A2, ATP1B2, AURKB, BCHE, BCL2, BDH2, BICC1, BIRC5, BLM, BMF, BRCA2, BRD8, BRIP1, C10orf71, CARD8, CASQ1, CASTOR3, CBLB, CCDC6, CCNA2, CCNY, CDC20, CDK1, CEP55, CGNL1, CHAF1A, CHEK1, CILP, …
GO:0035556	intracellular signal transduction	GO_BiologicalProcess-EBI-UniProt-GOA_27.02.2019_00h00	2.64716e-08	4.71988e-05	2.36846e-12	2.13162e-11	[3, 4, 5]	Group12	6.68799	230	[ACKR3, ACKR4, ADCY6, ADGRL4, AGO1, AKAP13, ANGPT1, ANK2, APLNR, APP, ARHGAP11A, ARHGAP11B, ARHGAP18, ARHGAP19, ARHGAP29, ARHGAP33, ARHGDIB, ARHGEF25, ARRB1, ATM, ATP1A2, AURKB, BCL2, BDH2, BLM, BMF, BRCA2, BRIP1, C10orf71, CADPS, CALCRL, CARD8, CASQ1, CASTOR3, CCDC6, CCNA2, CCNB1, CDH19, CDK1, CEP55, CGNL1, CHAF1A, CHEK1, CIT, CNKSR3, COL1A2, CPAMD8, CRIP2, CXCR4, DCHS1, DDAH2, DEPDC1, DGKG, DLC…
GO:0031399	regulation of protein modification process	GO_BiologicalProcess-EBI-UniProt-GOA_27.02.2019_00h00	3.23875e-06	0.00561599	2.36846e-12	2.13162e-11	[5, 6, 7]	Group12	6.82211	158	[ACKR3, ACTB, ACVRL1, ADCY6, AFAP1L2, AKAP13, ANGPT1, APLNR, APP, ARRB1, ASPM, ATM, BCL2, BLM, CBLB, CCDC6, CCNA2, CCNB1, CCNF, CCNG2, CCNY, CDC20, CDC25A, CDK1, CDK2AP1, CENPE, CEP295, CEP85, CHAF1A, CHEK1, CLIP3, CLSPN, CNKSR3, CTDSPL, CXCR4, DBF4, DLC1, DLG1, DUSP26, DYSF, ECT2, EDN1, EEF1A2, EIF2AK2, ELP1, EPRS, FANCI, FBXO5, FILIP1L, FKTN, FN1, FOXM1, FYN, FZD4, GAREM1, GBP1, GNAI2, GRIK2, G…
GO:0006468	protein phosphorylation	GO_BiologicalProcess-EBI-UniProt-GOA_27.02.2019_00h00	5.79257e-07	0.00101776	2.36846e-12	2.13162e-11	[6, 7]	Group12	6.88952	169	[ACKR3, ACTB, ACVRL1, ADCY6, AFAP1L2, AKAP13, ALPK2, ANGPT1, APLNR, APP, ARRB1, ASPM, ATM, AURKB, BCL2, BIRC5, BLM, BUB1, BUB1B, CBLB, CCDC6, CCNA2, CCNB1, CCNF, CCNG2, CCNY, CDC25A, CDK1, CDK19, CDK2AP1, CDKL5, CENPE, CEP85, CHAF1A, CHEK1, CIT, CLIP3, CLK4, CLSPN, CNKSR3, CTDSPL, CXCR4, DBF4, DLG1, DUSP26, ECT2, EDN1, EEF1A2, EFNB3, EIF2AK2, ELP1, EPRS, ERG, FILIP1L, FKTN, FN1, FOXM1, FPGT-TNNI3…
GO:0042325	regulation of phosphorylation	GO_BiologicalProcess-EBI-UniProt-GOA_27.02.2019_00h00	5.33424e-06	0.0092069	2.36846e-12	2.13162e-11	[6, 7]	Group12	6.93756	140	[ACKR3, ACTB, ACVRL1, ADCY6, AFAP1L2, AKAP13, ANGPT1, APLN, APLNR, APP, ARRB1, ASPM, ATM, BCL2, BLM, CBLB, CCDC6, CCNA2, CCNB1, CCNF, CCNG2, CCNY, CDC25A, CDK1, CDK2AP1, CENPE, CEP85, CHAF1A, CLIP3, CLSPN, CNKSR3, CTDSPL, CXCR4, DBF4, DLC1, DLG1, DUSP26, ECT2, EDN1, EEF1A2, EIF2AK2, ELP1, EPRS, FILIP1L, FKTN, FN1, FOXM1, FYN, FZD4, GAREM1, GBP1, GNAI2, GRIK2, GRM1, HACD3, HCLS1, HGF, HMGB1, HMGCR…
GO:0001932	regulation of protein phosphorylation	GO_BiologicalProcess-EBI-UniProt-GOA_27.02.2019_00h00	2.15435e-06	0.00374641	2.36846e-12	2.13162e-11	[6, 7, 8]	Group12	7.15447	132	[ACKR3, ACTB, ACVRL1, ADCY6, AFAP1L2, AKAP13, ANGPT1, APLNR, APP, ARRB1, ASPM, ATM, BCL2, BLM, CBLB, CCDC6, CCNA2, CCNB1, CCNF, CCNG2, CCNY, CDC25A, CDK1, CDK2AP1, CENPE, CEP85, CHAF1A, CLIP3, CLSPN, CNKSR3, CTDSPL, CXCR4, DBF4, DLG1, DUSP26, ECT2, EDN1, EEF1A2, EIF2AK2, ELP1, EPRS, FILIP1L, FKTN, FN1, FOXM1, FYN, FZD4, GAREM1, GBP1, GNAI2, GRIK2, GRM1, HACD3, HCLS1, HGF, HMGB1, HMGCR, HRC, INSR,…
GO:0006996	organelle organization	GO_BiologicalProcess-EBI-UniProt-GOA_27.02.2019_00h00	1.15204e-20	2.12782e-17	1.88649e-17	2.64109e-16	[3]	Group13	7.47025	339	[ACOX2, ACTA1, ACTB, ACTC1, ACTG1, ADD3, AGO4, AKAP13, ANGPT2, ANK2, ANKRD28, ANLN, ANP32E, ANXA1, ARHGAP18, ARHGDIB, ARID2, ARRB1, ASPM, ATAD2, ATM, ATRNL1, AURKB, BAZ2B, BBOF1, BBS9, BCL2, BIRC5, BLM, BMF, BNIP3L, BRCA2, BRD8, BRIP1, BUB1, BUB1B, CALCOCO2, CAP2, CASQ1, CC2D2A, CCDC113, CCDC6, CCDC69, CCNA2, CCNB1, CCNF, CCNG2, CCNY, CD34, CDC20, CDC27, CDC45, CDCA5, CDCA8, CDK1, CDKL5, CENPC, C…
GO:0051128	regulation of cellular component organization	GO_BiologicalProcess-EBI-UniProt-GOA_27.02.2019_00h00	2.28329e-10	4.12362e-07	1.88649e-17	2.64109e-16	[3, 4]	Group13	7.16418	216	[ACVRL1, ADCY6, ADD3, AGO4, AKAP13, ANGPT1, ANLN, ANXA1, APLN, APP, ARHGAP18, ARHGAP33, ARHGDIB, ARRB1, ASPM, ATAD2, ATM, ATRNL1, AURKB, BCL2, BMF, BNIP3L, BUB1, BUB1B, CALCOCO2, CCDC6, CCNA2, CCNB1, CCNF, CCNG2, CDC20, CDC27, CDC45, CDCA5, CDK19, CDKL5, CENPE, CENPF, CEP295, CEP57, CEP85, CHEK1, CIT, CKAP2, CLIP3, CPNE5, CRIP2, CTNND1, DENND5A, DLC1, DLG1, DLGAP5, DOCK1, DPYSL2, DPYSL3, DTL, DUS…
GO:0007010	cytoskeleton organization	GO_BiologicalProcess-EBI-UniProt-GOA_27.02.2019_00h00	3.2172e-24	5.95825e-21	1.88649e-17	2.64109e-16	[4]	Group13	10.6042	172	[ACTA1, ACTB, ACTC1, ACTG1, ADD3, AKAP13, ANK2, ANLN, ANXA1, ARHGAP18, ARHGDIB, ARRB1, ASPM, ATRNL1, AURKB, BCL2, BIRC5, BRCA2, CAP2, CASQ1, CC2D2A, CCDC6, CCDC69, CCNB1, CCNF, CDC20, CDK1, CENPE, CEP295, CEP57, CEP85, CGNL1, CHEK1, CIT, CKAP2, CLIP3, CNN2, CRIP2, CTNND1, DIAPH2, DIAPH3, DISC1, DLC1, DLG1, DNALI1, DOCK1, DPYSL2, DPYSL3, ECT2, EDN1, EEF1A2, EHD2, ELMO1, EPB41L2, EPS8, EVL, FANCD2,…
GO:0051129	negative regulation of cellular component organization	GO_BiologicalProcess-EBI-UniProt-GOA_27.02.2019_00h00	1.85142e-06	0.00322146	1.88649e-17	2.64109e-16	[3, 4, 5]	Group13	8.35118	78	[ACVRL1, ADCY6, ADD3, ASPM, ATAD2, ATM, ATRNL1, AURKB, BUB1, BUB1B, CCNB1, CCNF, CDC20, CENPF, CHEK1, CKAP2, CLIP3, CRIP2, DENND5A, DLC1, DPYSL3, DUSP26, EFNB3, EPS8, EVL, FBXO5, FMNL3, FYN, GBP1, HGF, HIST1H1B, HIST1H1D, HMGB1, KIF14, LMOD1, LMOD2, LMOD3, LRP4, MAD2L1, MCM2, MCM7, MCTP1, MINAR1, NBN, NCAPG, NDC80, NEK2, NUPR1, OCRL, PLK1, PLP1, POSTN, PRKN, PTPN9, PTPRS, RAPGEF3, SEMA3A, SEMA4C,…
GO:0033043	regulation of organelle organization	GO_BiologicalProcess-EBI-UniProt-GOA_27.02.2019_00h00	2.70903e-13	4.95212e-10	1.88649e-17	2.64109e-16	[4, 5]	Group13	8.82532	145	[ADD3, AKAP13, ANLN, ANXA1, ARHGAP18, ARHGDIB, ARRB1, ASPM, ATAD2, ATM, ATRNL1, AURKB, BCL2, BMF, BNIP3L, BUB1, BUB1B, CALCOCO2, CCNA2, CCNB1, CCNF, CCNG2, CDC20, CDC27, CDC45, CDCA5, CDKL5, CENPE, CENPF, CEP295, CEP85, CHEK1, CIT, CKAP2, CLIP3, CRIP2, DLC1, DLG1, DLGAP5, DUSP26, DYNC2LI1, ECT2, EDN1, EEF1A2, EHD2, EPS8, EVL, FBXO5, FMNL3, FN1, GOLPH3, GRIK2, HCLS1, HECW2, HGF, HIST1H1B, HIST1H1D…
GO:1902903	regulation of supramolecular fiber organization	GO_BiologicalProcess-EBI-UniProt-GOA_27.02.2019_00h00	3.50567e-06	0.00607533	1.88649e-17	2.64109e-16	[4, 5]	Group13	9.93377	45	[ADD3, AKAP13, APP, ARHGAP18, CIT, CKAP2, CLIP3, DLC1, DLG1, EDN1, EEF1A2, EPS8, EVL, FMNL3, HCLS1, LIMCH1, LMOD1, LMOD2, LMOD3, MECOM, NCAPG, NIN, PLEKHG2, PLP1, PREX1, PRKN, PRUNE1, PXDN, RAPGEF3, RICTOR, SEMA4C, SFRP1, SHANK3, SNX9, SORBS3, STMN1, SYNPO2, TMOD2, TMSB4X, TPM1, TTBK2, TTC8, TUBB, TWF1, WHAMMP3]
GO:0010639	negative regulation of organelle organization	GO_BiologicalProcess-EBI-UniProt-GOA_27.02.2019_00h00	8.30931e-07	0.00145745	1.88649e-17	2.64109e-16	[4, 5, 6]	Group13	9.82987	52	[ADD3, ASPM, ATAD2, ATM, ATRNL1, AURKB, BUB1, BUB1B, CCNB1, CCNF, CDC20, CENPF, CHEK1, CKAP2, CLIP3, CRIP2, DLC1, DUSP26, EPS8, FBXO5, FMNL3, HGF, HIST1H1B, HIST1H1D, LMOD1, LMOD2, LMOD3, MAD2L1, MCM2, MCM7, NBN, NCAPG, NDC80, NEK2, NUPR1, PLK1, PRKN, SHANK3, STMN1, STON1, SYT4, TMOD2, TMSB4X, TOP2A, TPR, TRIP13, TTBK2, TTK, TUBB, TWF1, VAT1, XRN1]
GO:0051493	regulation of cytoskeleton organization	GO_BiologicalProcess-EBI-UniProt-GOA_27.02.2019_00h00	2.15769e-08	3.85147e-05	1.88649e-17	2.64109e-16	[5, 6]	Group13	9.85294	67	[ADD3, AKAP13, ARHGAP18, ARHGDIB, CCNF, CEP295, CEP85, CHEK1, CIT, CKAP2, CLIP3, DLC1, DLG1, ECT2, EDN1, EEF1A2, EPS8, EVL, FMNL3, HCLS1, KIF11, KIF18A, LIMCH1, LMOD1, LMOD2, LMOD3, MECOM, NCAPG, NEK2, NEXN, NIN, PDGFRB, PHLDB1, PLEKHG2, PLK1, PLK4, PLP1, PREX1, PRKN, PRUNE1, PXDN, RAPGEF3, RHOJ, RICTOR, SEMA4C, SFRP1, SHANK3, SKA1, SKA3, SNX9, SORBS3, SPAG5, STIL, STMN1, SYNPO2, TACC3, TEK, TMOD…
GO:0051783	regulation of nuclear division	GO_BiologicalProcess-EBI-UniProt-GOA_27.02.2019_00h00	1.31595e-12	2.39898e-09	1.88649e-17	2.64109e-16	[5, 6]	Group13	15.8451	45	[ANLN, ATM, AURKB, BUB1, BUB1B, CCNA2, CCNB1, CCNF, CCNG2, CDC20, CDC27, CDCA5, CENPE, CENPF, CEP85, CHEK1, CRIP2, DLGAP5, EDN1, FBXO5, HECW2, INSR, KIF11, KIF20B, MAD2L1, MKI67, NDC80, NEK2, NUSAP1, PBK, PDE3A, PDGFRB, PDZD2, PEBP1, PHIP, PLK1, PLP1, RIOK2, SIRT2, SLF1, TACC3, TPR, TRIP13, TTK, UBE2C]
GO:0051983	regulation of chromosome segregation	GO_BiologicalProcess-EBI-UniProt-GOA_27.02.2019_00h00	2.00818e-13	3.67698e-10	4.61601e-33	9.23203e-32	[3, 4]	Group14	22.963	31	[ATM, AURKB, BUB1, BUB1B, CCNB1, CDC20, CDC27, CDCA5, CENPE, CENPF, CRIP2, DLGAP5, ECT2, FBXO5, HECW2, KIF2C, KNSTRN, MAD2L1, MKI67, NDC80, NEK2, PLK1, RACGAP1, RIOK2, SIRT2, SLF1, SPAG5, TACC3, TPR, TRIP13, TTK]
GO:0000226	microtubule cytoskeleton organization	GO_BiologicalProcess-EBI-UniProt-GOA_27.02.2019_00h00	1.68508e-10	3.04662e-07	4.61601e-33	9.23203e-32	[3, 5]	Group14	10.6509	72	[ASPM, AURKB, BIRC5, BRCA2, CC2D2A, CCDC69, CCNB1, CCNF, CDC20, CDK1, CENPE, CEP295, CEP57, CEP85, CHEK1, CKAP2, CLIP3, CRIP2, DISC1, DLG1, DNALI1, FANCD2, FBXO5, FYN, GAS2L3, HAUS4, IFT172, KIF11, KIF18A, KIF18B, KIF20A, KIF23, KIF2C, KIF4A, KIFC1, KNSTRN, MYBL2, NDC80, NEK2, NIN, NUF2, NUSAP1, PARD3B, PHLDB1, PKD2, PLK1, PLK4, PRC1, PRUNE1, RACGAP1, SETD2, SKA1, SKA3, SPAG5, SPC25, STIL, STMN1,…
GO:0007010	cytoskeleton organization	GO_BiologicalProcess-EBI-UniProt-GOA_27.02.2019_00h00	3.2172e-24	5.95825e-21	4.61601e-33	9.23203e-32	[4]	Group14	10.6042	172	[ACTA1, ACTB, ACTC1, ACTG1, ADD3, AKAP13, ANK2, ANLN, ANXA1, ARHGAP18, ARHGDIB, ARRB1, ASPM, ATRNL1, AURKB, BCL2, BIRC5, BRCA2, CAP2, CASQ1, CC2D2A, CCDC6, CCDC69, CCNB1, CCNF, CDC20, CDK1, CENPE, CEP295, CEP57, CEP85, CGNL1, CHEK1, CIT, CKAP2, CLIP3, CNN2, CRIP2, CTNND1, DIAPH2, DIAPH3, DISC1, DLC1, DLG1, DNALI1, DOCK1, DPYSL2, DPYSL3, ECT2, EDN1, EEF1A2, EHD2, ELMO1, EPB41L2, EPS8, EVL, FANCD2,…
GO:0007051	spindle organization	GO_BiologicalProcess-EBI-UniProt-GOA_27.02.2019_00h00	4.16042e-10	7.50956e-07	4.61601e-33	9.23203e-32	[3, 4, 6]	Group14	16.1905	34	[ASPM, AURKB, BIRC5, CCDC69, CCNB1, CDC20, CENPE, CRIP2, DLG1, FBXO5, HAUS4, KIF11, KIF23, KIF4A, KIFC1, KNSTRN, MYBL2, NDC80, NEK2, NUF2, PLK1, PRC1, RACGAP1, SPAG5, SPC25, STIL, STMN1, TACC3, TPR, TPX2, TTK, TUBB, TUBGCP3, WDR62]
GO:0000819	sister chromatid segregation	GO_BiologicalProcess-EBI-UniProt-GOA_27.02.2019_00h00	5.31221e-20	9.80103e-17	4.61601e-33	9.23203e-32	[4, 5]	Group14	21.2245	52	[ATM, AURKB, BUB1, BUB1B, CCNB1, CDC20, CDC27, CDCA5, CDCA8, CENPC, CENPE, CENPF, CRIP2, DLGAP5, DSN1, FBXO5, HECW2, INCENP, KIF14, KIF18A, KIF18B, KIF22, KIF23, KIF2C, KIF4A, KIFC1, KNSTRN, MAD2L1, NCAPD3, NCAPG, NCAPH, NDC80, NEK2, NUF2, NUSAP1, PDS5A, PLK1, PRC1, RACGAP1, RIOK2, SLF1, SMC2, SMC4, SPAG5, STAG3, TACC3, TOP2A, TOP2B, TPR, TRIP13, TTK, ZWINT]
GO:0140014	mitotic nuclear division	GO_BiologicalProcess-EBI-UniProt-GOA_27.02.2019_00h00	1.01196e-24	1.87517e-21	4.61601e-33	9.23203e-32	[4, 5, 6]	Group14	19.3548	72	[ANLN, ATM, AURKB, BIRC5, BUB1, BUB1B, CCNA2, CCNB1, CCNF, CCNG2, CDC20, CDC27, CDCA5, CDCA8, CENPC, CENPE, CENPF, CEP85, CHEK1, CRIP2, DLGAP5, DSN1, EDN1, EPS8, FBXO5, HECW2, INCENP, INSR, KIF11, KIF14, KIF18A, KIF18B, KIF20B, KIF22, KIF23, KIF2C, KIF4A, KIFC1, KNSTRN, MAD2L1, MKI67, MYBL2, NCAPD3, NCAPG, NCAPH, NDC80, NEK2, NUF2, NUSAP1, PBK, PDGFRB, PDS5A, PDZD2, PEBP1, PHIP, PLK1, PLP1, PRC1,…
GO:1902850	microtubule cytoskeleton organization involved in mitosis	GO_BiologicalProcess-EBI-UniProt-GOA_27.02.2019_00h00	1.05545e-08	1.88926e-05	4.61601e-33	9.23203e-32	[4, 5, 6]	Group14	16.875	27	[AURKB, BIRC5, CCNB1, CDC20, CENPE, CRIP2, KIF11, KIF23, KIF4A, KIFC1, MYBL2, NDC80, NEK2, NUF2, NUSAP1, PLK1, PRC1, RACGAP1, SETD2, SPC25, STIL, STMN1, TACC3, TPR, TPX2, TTK, WDR62]
GO:0051225	spindle assembly	GO_BiologicalProcess-EBI-UniProt-GOA_27.02.2019_00h00	4.73144e-06	0.00817593	4.61601e-33	9.23203e-32	[4, 5, 7]	Group14	15.1515	20	[ASPM, AURKB, BIRC5, CCDC69, CDC20, FBXO5, HAUS4, KIF11, KIF23, KIF4A, KIFC1, MYBL2, NEK2, PLK1, RACGAP1, SPAG5, TPR, TPX2, TUBB, TUBGCP3]
GO:0000070	mitotic sister chromatid segregation	GO_BiologicalProcess-EBI-UniProt-GOA_27.02.2019_00h00	5.75042e-22	1.06325e-18	4.61601e-33	9.23203e-32	[4, 5, 6, 7]	Group14	24.7475	49	[ATM, AURKB, BUB1, BUB1B, CCNB1, CDC20, CDC27, CDCA5, CDCA8, CENPC, CENPE, CENPF, CRIP2, DLGAP5, DSN1, FBXO5, HECW2, INCENP, KIF14, KIF18A, KIF18B, KIF22, KIF23, KIF2C, KIF4A, KIFC1, KNSTRN, MAD2L1, NCAPD3, NCAPG, NCAPH, NDC80, NEK2, NUF2, NUSAP1, PDS5A, PLK1, PRC1, RACGAP1, RIOK2, SLF1, SMC2, SMC4, SPAG5, TACC3, TPR, TRIP13, TTK, ZWINT]
GO:0007052	mitotic spindle organization	GO_BiologicalProcess-EBI-UniProt-GOA_27.02.2019_00h00	9.65657e-09	1.73046e-05	4.61601e-33	9.23203e-32	[4, 5, 6, 7]	Group14	18.6047	24	[AURKB, BIRC5, CCNB1, CDC20, CENPE, KIF11, KIF23, KIF4A, KIFC1, MYBL2, NDC80, NEK2, NUF2, PLK1, PRC1, RACGAP1, SPC25, STIL, STMN1, TACC3, TPR, TPX2, TTK, WDR62]
GO:0006996	organelle organization	GO_BiologicalProcess-EBI-UniProt-GOA_27.02.2019_00h00	1.15204e-20	2.12782e-17	5.53447e-23	1.05155e-21	[3]	Group15	7.47025	339	[ACOX2, ACTA1, ACTB, ACTC1, ACTG1, ADD3, AGO4, AKAP13, ANGPT2, ANK2, ANKRD28, ANLN, ANP32E, ANXA1, ARHGAP18, ARHGDIB, ARID2, ARRB1, ASPM, ATAD2, ATM, ATRNL1, AURKB, BAZ2B, BBOF1, BBS9, BCL2, BIRC5, BLM, BMF, BNIP3L, BRCA2, BRD8, BRIP1, BUB1, BUB1B, CALCOCO2, CAP2, CASQ1, CC2D2A, CCDC113, CCDC6, CCDC69, CCNA2, CCNB1, CCNF, CCNG2, CCNY, CD34, CDC20, CDC27, CDC45, CDCA5, CDCA8, CDK1, CDKL5, CENPC, C…
GO:0097435	supramolecular fiber organization	GO_BiologicalProcess-EBI-UniProt-GOA_27.02.2019_00h00	1.9126e-15	3.51535e-12	5.53447e-23	1.05155e-21	[3]	Group15	11.3054	97	[ACTA1, ACTC1, ACTG1, ADD3, AKAP13, APP, ARHGAP18, ARRB1, ATRNL1, BCL2, CAP2, CASQ1, CGNL1, CIT, CKAP2, CLIP3, COL11A1, COL1A2, COL5A2, CTNND1, DIAPH2, DIAPH3, DLC1, DLG1, DPYSL3, EDN1, EEF1A2, EPS8, EVL, FBXO5, FMNL3, FYN, HCLS1, HIP1, IFT172, JAK2, KIF18A, KIF18B, KIF2C, KLHL24, LDB3, LIMCH1, LMOD1, LMOD2, LMOD3, LOX, LOXL3, MECOM, MYBPC3, MYH11, MYH6, MYL2, MYOM1, NCAPG, NEBL, NIN, OBSCN, PDGF…
GO:0032970	regulation of actin filament-based process	GO_BiologicalProcess-EBI-UniProt-GOA_27.02.2019_00h00	7.9275e-08	0.000140396	5.53447e-23	1.05155e-21	[3, 4]	Group15	10.5906	52	[ADD3, AKAP13, ANK2, ARHGAP18, ARHGDIB, ATP1A2, CIT, CNN2, CTNNA3, DLC1, DLG1, ECT2, EDN1, EEF1A2, EPS8, EVL, FMNL3, HCLS1, LIMCH1, LMOD1, LMOD2, LMOD3, MECOM, MYBPC3, NCAPG, PDGFRB, PLEKHG2, PLP1, PREX1, PRKN, PXDN, RAPGEF3, RHOJ, RICTOR, RNF207, SCN5A, SEMA4C, SFRP1, SHANK3, SNX9, SORBS3, STMN1, SYNPO2, TEK, TMOD2, TMSB4X, TNNI3, TNNT2, TPM1, TTC8, TWF1, WHAMMP3]
GO:0000226	microtubule cytoskeleton organization	GO_BiologicalProcess-EBI-UniProt-GOA_27.02.2019_00h00	1.68508e-10	3.04662e-07	5.53447e-23	1.05155e-21	[3, 5]	Group15	10.6509	72	[ASPM, AURKB, BIRC5, BRCA2, CC2D2A, CCDC69, CCNB1, CCNF, CDC20, CDK1, CENPE, CEP295, CEP57, CEP85, CHEK1, CKAP2, CLIP3, CRIP2, DISC1, DLG1, DNALI1, FANCD2, FBXO5, FYN, GAS2L3, HAUS4, IFT172, KIF11, KIF18A, KIF18B, KIF20A, KIF23, KIF2C, KIF4A, KIFC1, KNSTRN, MYBL2, NDC80, NEK2, NIN, NUF2, NUSAP1, PARD3B, PHLDB1, PKD2, PLK1, PLK4, PRC1, PRUNE1, RACGAP1, SETD2, SKA1, SKA3, SPAG5, SPC25, STIL, STMN1,…
GO:0007010	cytoskeleton organization	GO_BiologicalProcess-EBI-UniProt-GOA_27.02.2019_00h00	3.2172e-24	5.95825e-21	5.53447e-23	1.05155e-21	[4]	Group15	10.6042	172	[ACTA1, ACTB, ACTC1, ACTG1, ADD3, AKAP13, ANK2, ANLN, ANXA1, ARHGAP18, ARHGDIB, ARRB1, ASPM, ATRNL1, AURKB, BCL2, BIRC5, BRCA2, CAP2, CASQ1, CC2D2A, CCDC6, CCDC69, CCNB1, CCNF, CDC20, CDK1, CENPE, CEP295, CEP57, CEP85, CGNL1, CHEK1, CIT, CKAP2, CLIP3, CNN2, CRIP2, CTNND1, DIAPH2, DIAPH3, DISC1, DLC1, DLG1, DNALI1, DOCK1, DPYSL2, DPYSL3, ECT2, EDN1, EEF1A2, EHD2, ELMO1, EPB41L2, EPS8, EVL, FANCD2,…
GO:0030036	actin cytoskeleton organization	GO_BiologicalProcess-EBI-UniProt-GOA_27.02.2019_00h00	8.84538e-14	1.62224e-10	5.53447e-23	1.05155e-21	[3, 5]	Group15	10.9134	92	[ACTA1, ACTB, ACTC1, ACTG1, ADD3, AKAP13, ANLN, ANXA1, ARHGAP18, ARHGDIB, ARRB1, ATRNL1, BCL2, CAP2, CASQ1, CGNL1, CIT, CNN2, CTNND1, DIAPH2, DIAPH3, DLC1, DLG1, DPYSL3, ECT2, EDN1, EEF1A2, EHD2, ELMO1, EPB41L2, EPS8, EVL, FGD5, FMNL3, GAS2L3, HCLS1, HIP1, INF2, JAK2, KIF23, LDB3, LIMCH1, LMOD1, LMOD2, LMOD3, MECOM, MYBPC3, MYH11, MYH6, MYL2, MYOM1, NCAPG, NEBL, NRK, OBSCN, PDGFRB, PGM5, PLEKHG2,…
GO:0033043	regulation of organelle organization	GO_BiologicalProcess-EBI-UniProt-GOA_27.02.2019_00h00	2.70903e-13	4.95212e-10	5.53447e-23	1.05155e-21	[4, 5]	Group15	8.82532	145	[ADD3, AKAP13, ANLN, ANXA1, ARHGAP18, ARHGDIB, ARRB1, ASPM, ATAD2, ATM, ATRNL1, AURKB, BCL2, BMF, BNIP3L, BUB1, BUB1B, CALCOCO2, CCNA2, CCNB1, CCNF, CCNG2, CDC20, CDC27, CDC45, CDCA5, CDKL5, CENPE, CENPF, CEP295, CEP85, CHEK1, CIT, CKAP2, CLIP3, CRIP2, DLC1, DLG1, DLGAP5, DUSP26, DYNC2LI1, ECT2, EDN1, EEF1A2, EHD2, EPS8, EVL, FBXO5, FMNL3, FN1, GOLPH3, GRIK2, HCLS1, HECW2, HGF, HIST1H1B, HIST1H1D…
GO:1902903	regulation of supramolecular fiber organization	GO_BiologicalProcess-EBI-UniProt-GOA_27.02.2019_00h00	3.50567e-06	0.00607533	5.53447e-23	1.05155e-21	[4, 5]	Group15	9.93377	45	[ADD3, AKAP13, APP, ARHGAP18, CIT, CKAP2, CLIP3, DLC1, DLG1, EDN1, EEF1A2, EPS8, EVL, FMNL3, HCLS1, LIMCH1, LMOD1, LMOD2, LMOD3, MECOM, NCAPG, NIN, PLEKHG2, PLP1, PREX1, PRKN, PRUNE1, PXDN, RAPGEF3, RICTOR, SEMA4C, SFRP1, SHANK3, SNX9, SORBS3, STMN1, SYNPO2, TMOD2, TMSB4X, TPM1, TTBK2, TTC8, TUBB, TWF1, WHAMMP3]
GO:0007015	actin filament organization	GO_BiologicalProcess-EBI-UniProt-GOA_27.02.2019_00h00	1.17787e-10	2.13076e-07	5.53447e-23	1.05155e-21	[4, 6]	Group15	11.6635	61	[ACTA1, ACTC1, ADD3, ARHGAP18, ARRB1, ATRNL1, BCL2, CAP2, CGNL1, CIT, CTNND1, DIAPH2, DIAPH3, DLC1, DLG1, DPYSL3, EEF1A2, EPS8, EVL, FMNL3, HCLS1, HIP1, JAK2, LIMCH1, LMOD1, LMOD2, LMOD3, MECOM, MYBPC3, MYOM1, NCAPG, NEBL, PLEKHG2, PLP1, PLSCR4, PREX1, PRKN, PXDN, RAPGEF3, RFLNB, RHOJ, RICTOR, RIN2, SEMA4C, SFRP1, SHANK3, SHROOM4, SNX9, SORBS1, SORBS3, STMN1, SYNPO2, TCAP, TMOD2, TMSB4X, TNNT2, T…
GO:0031032	actomyosin structure organization	GO_BiologicalProcess-EBI-UniProt-GOA_27.02.2019_00h00	7.75323e-13	1.41574e-09	5.53447e-23	1.05155e-21	[4, 6]	Group15	16.9355	42	[ACTA1, ACTC1, ACTG1, AKAP13, ANLN, ARRB1, CASQ1, CNN2, DLC1, ECT2, EDN1, EPB41L2, EVL, FMNL3, KIF23, LDB3, LIMCH1, LMOD1, LMOD2, LMOD3, MYBPC3, MYH11, MYH6, MYL2, MYOM1, NEBL, OBSCN, PDGFRB, PGM5, PXDN, RACGAP1, RAPGEF3, SFRP1, SORBS1, SORBS3, STMN1, TCAP, TMOD2, TNNT1, TNNT2, TPM1, TTC8]
GO:0051493	regulation of cytoskeleton organization	GO_BiologicalProcess-EBI-UniProt-GOA_27.02.2019_00h00	2.15769e-08	3.85147e-05	5.53447e-23	1.05155e-21	[5, 6]	Group15	9.85294	67	[ADD3, AKAP13, ARHGAP18, ARHGDIB, CCNF, CEP295, CEP85, CHEK1, CIT, CKAP2, CLIP3, DLC1, DLG1, ECT2, EDN1, EEF1A2, EPS8, EVL, FMNL3, HCLS1, KIF11, KIF18A, LIMCH1, LMOD1, LMOD2, LMOD3, MECOM, NCAPG, NEK2, NEXN, NIN, PDGFRB, PHLDB1, PLEKHG2, PLK1, PLK4, PLP1, PREX1, PRKN, PRUNE1, PXDN, RAPGEF3, RHOJ, RICTOR, SEMA4C, SFRP1, SHANK3, SKA1, SKA3, SNX9, SORBS3, SPAG5, STIL, STMN1, SYNPO2, TACC3, TEK, TMOD…
GO:0003012	muscle system process	GO_BiologicalProcess-EBI-UniProt-GOA_27.02.2019_00h00	2.73965e-16	5.0437e-13	9.56376e-16	1.14765e-14	[3]	Group16	13.5379	75	[ABAT, ACTA1, ACTA2, ACTC1, ACTG2, AKAP13, ANK2, ANXA6, ATP1A2, CALCRL, CALD1, CASQ1, CTNNA3, DLG1, DOCK4, DPYSL3, DYSF, EDN1, EHD2, ERG, FGF12, FPGT-TNNI3K, FYN, GUCY1A1, HERPUD1, HRC, IGFBP5, ITGA1, KCNQ1, LMOD1, LMOD2, LMOD3, MYBPC3, MYH11, MYH6, MYH7, MYL2, MYL3, MYL4, MYL6B, MYL7, MYOCD, MYOF, MYOM1, OCRL, PBK, PDE5A, PDZD2, PIK3CA, PIK3CG, PLCE1, PRKG1, PXDN, RCSD1, RNF207, SCN2B, SCN5A, SC…
GO:0003013	circulatory system process	GO_BiologicalProcess-EBI-UniProt-GOA_27.02.2019_00h00	7.68196e-10	1.38429e-06	9.56376e-16	1.14765e-14	[3]	Group16	10.2962	73	[ABAT, ACSM3, ACTA2, ACTC1, ACVRL1, ADCY6, AKAP13, ANGPT1, ANK2, APLN, ASPM, ATP1A2, ATP1B2, CASQ1, CD34, COL1A2, CORIN, CPAMD8, CTNNA3, CXCR4, DDAH2, DLG1, DOCK4, EDN1, EHD2, ERG, FGF12, FPGT-TNNI3K, FXYD6, FYN, GNAI2, GUCY1A1, HERPUD1, HMGCR, HRC, ITGA1, JAK2, KCNQ1, MOK, MYBPC3, MYH6, MYH7, MYL2, MYL3, MYL4, MYOF, NCALD, PCDHA4, PDE3A, PDE5A, PEBP1, PIK3CA, PIK3CG, POSTN, PRCP, PRKG1, RAMP2, R…
GO:0003015	heart process	GO_BiologicalProcess-EBI-UniProt-GOA_27.02.2019_00h00	4.78432e-09	8.58785e-06	9.56376e-16	1.14765e-14	[4]	Group16	12.2667	46	[ACTC1, AKAP13, ANK2, APLN, ASPM, ATP1A2, ATP1B2, CASQ1, CORIN, CTNNA3, DLG1, EDN1, EHD2, ERG, FGF12, FPGT-TNNI3K, FXYD6, FYN, GNAI2, HERPUD1, HRC, JAK2, KCNQ1, MYBPC3, MYH6, MYH7, MYL2, MYL3, MYL4, PDE5A, PEBP1, PIK3CA, PIK3CG, RNF207, SCN2B, SCN5A, SEMA3A, SGCD, TCAP, THRA, TMEM65, TNNI3, TNNT1, TNNT2, TPM1, TRDN]
GO:0006936	muscle contraction	GO_BiologicalProcess-EBI-UniProt-GOA_27.02.2019_00h00	1.47326e-18	2.71522e-15	9.56376e-16	1.14765e-14	[4]	Group16	15.7534	69	[ABAT, ACTA1, ACTA2, ACTC1, ACTG2, ANK2, ANXA6, ATP1A2, CALCRL, CALD1, CASQ1, CTNNA3, DLG1, DOCK4, DPYSL3, DYSF, EDN1, EHD2, ERG, FGF12, FPGT-TNNI3K, FYN, GUCY1A1, HRC, ITGA1, KCNQ1, LMOD1, LMOD2, LMOD3, MYBPC3, MYH11, MYH6, MYH7, MYL2, MYL3, MYL4, MYL6B, MYL7, MYOCD, MYOF, MYOM1, PBK, PDE5A, PIK3CA, PIK3CG, PLCE1, PRKG1, PXDN, RCSD1, RNF207, SCN2B, SCN5A, SCN7A, SGCA, SGCD, SLMAP, SORBS1, SORBS3…
GO:0008015	blood circulation	GO_BiologicalProcess-EBI-UniProt-GOA_27.02.2019_00h00	6.41712e-09	1.15123e-05	9.56376e-16	1.14765e-14	[4]	Group16	10	70	[ABAT, ACSM3, ACTA2, ACTC1, ACVRL1, ADCY6, ANGPT1, ANK2, APLN, ASPM, ATP1A2, ATP1B2, CASQ1, CD34, COL1A2, CORIN, CPAMD8, CTNNA3, CXCR4, DDAH2, DLG1, DOCK4, EDN1, EHD2, ERG, FGF12, FPGT-TNNI3K, FXYD6, GUCY1A1, HERPUD1, HMGCR, HRC, ITGA1, JAK2, KCNQ1, MOK, MYBPC3, MYH6, MYH7, MYL2, MYL3, MYL4, MYOF, NCALD, PCDHA4, PDE3A, PDE5A, PEBP1, PIK3CA, PIK3CG, POSTN, PRCP, PRKG1, RAMP2, RNF207, SCN2B, SCN5A,…
GO:0070252	actin-mediated cell contraction	GO_BiologicalProcess-EBI-UniProt-GOA_27.02.2019_00h00	2.12312e-10	3.83648e-07	9.56376e-16	1.14765e-14	[4]	Group16	20	27	[ACTA1, ACTC1, ANK2, ATP1A2, CTNNA3, DLG1, ERG, FGF12, KCNQ1, MYBPC3, MYH6, MYH7, MYL2, MYL3, MYL4, MYL6B, RNF207, SCN2B, SCN5A, SGCD, TCAP, TNNI1, TNNI3, TNNT1, TNNT2, TPM1, TPM4]
GO:0090257	regulation of muscle system process	GO_BiologicalProcess-EBI-UniProt-GOA_27.02.2019_00h00	4.2348e-07	0.000746173	9.56376e-16	1.14765e-14	[4, 5]	Group16	11.9601	36	[ABAT, ANK2, ANXA6, ATP1A2, CALCRL, CASQ1, CTNNA3, DLG1, DOCK4, EDN1, EHD2, FPGT-TNNI3K, GUCY1A1, HRC, IGFBP5, KCNQ1, MYBPC3, MYH7, MYL2, MYL3, MYOCD, PBK, PDE5A, PDZD2, PIK3CG, PLCE1, PRKG1, RNF207, SCN5A, SGCA, TNNI1, TNNI3, TNNT1, TNNT2, TPM1, TWF1]
GO:0006941	striated muscle contraction	GO_BiologicalProcess-EBI-UniProt-GOA_27.02.2019_00h00	4.26922e-10	7.70168e-07	9.56376e-16	1.14765e-14	[5]	Group16	15.8371	35	[ACTC1, ANK2, ATP1A2, CASQ1, CTNNA3, DLG1, DPYSL3, EHD2, ERG, FGF12, FPGT-TNNI3K, FYN, HRC, KCNQ1, LMOD3, MYBPC3, MYH6, MYH7, MYL2, MYL3, MYL4, PDE5A, PIK3CA, PIK3CG, RCSD1, RNF207, SCN2B, SCN5A, SGCD, TCAP, TNNI1, TNNI3, TNNT1, TNNT2, TPM1]
GO:0060047	heart contraction	GO_BiologicalProcess-EBI-UniProt-GOA_27.02.2019_00h00	6.34975e-08	0.000112708	9.56376e-16	1.14765e-14	[5]	Group16	11.7808	43	[ACTC1, ANK2, APLN, ASPM, ATP1A2, ATP1B2, CASQ1, CORIN, CTNNA3, DLG1, EDN1, EHD2, ERG, FGF12, FPGT-TNNI3K, FXYD6, HERPUD1, HRC, JAK2, KCNQ1, MYBPC3, MYH6, MYH7, MYL2, MYL3, MYL4, PDE5A, PEBP1, PIK3CA, PIK3CG, RNF207, SCN2B, SCN5A, SEMA3A, SGCD, TCAP, THRA, TMEM65, TNNI3, TNNT1, TNNT2, TPM1, TRDN]
GO:0006937	regulation of muscle contraction	GO_BiologicalProcess-EBI-UniProt-GOA_27.02.2019_00h00	2.69378e-09	4.84342e-06	9.56376e-16	1.14765e-14	[5, 6]	Group16	15.7635	32	[ABAT, ANK2, ANXA6, ATP1A2, CALCRL, CASQ1, CTNNA3, DLG1, DOCK4, EDN1, EHD2, FPGT-TNNI3K, GUCY1A1, HRC, KCNQ1, MYBPC3, MYH7, MYL2, MYL3, MYOCD, PBK, PDE5A, PIK3CG, PLCE1, PRKG1, RNF207, SCN5A, TNNI1, TNNI3, TNNT1, TNNT2, TPM1]
GO:0008016	regulation of heart contraction	GO_BiologicalProcess-EBI-UniProt-GOA_27.02.2019_00h00	3.10705e-06	0.00539383	9.56376e-16	1.14765e-14	[5, 6]	Group16	11.1821	35	[ANK2, APLN, ATP1A2, ATP1B2, CASQ1, CORIN, CTNNA3, DLG1, EDN1, EHD2, ERG, FPGT-TNNI3K, FXYD6, HERPUD1, HRC, JAK2, KCNQ1, MYH6, MYH7, MYL2, MYL3, MYL4, PDE5A, PEBP1, PIK3CG, RNF207, SCN2B, SCN5A, SEMA3A, THRA, TMEM65, TNNI3, TNNT2, TPM1, TRDN]
GO:0030049	muscle filament sliding	GO_BiologicalProcess-EBI-UniProt-GOA_27.02.2019_00h00	5.30353e-11	9.60469e-08	9.56376e-16	1.14765e-14	[5, 6]	Group16	37.2093	16	[ACTA1, ACTC1, MYBPC3, MYH6, MYH7, MYL2, MYL3, MYL4, MYL6B, TCAP, TNNI1, TNNI3, TNNT1, TNNT2, TPM1, TPM4]
GO:0060048	cardiac muscle contraction	GO_BiologicalProcess-EBI-UniProt-GOA_27.02.2019_00h00	1.02334e-08	1.8328e-05	9.56376e-16	1.14765e-14	[6]	Group16	16.0221	29	[ACTC1, ANK2, ATP1A2, CTNNA3, DLG1, EHD2, ERG, FGF12, FPGT-TNNI3K, HRC, KCNQ1, MYBPC3, MYH6, MYH7, MYL2, MYL3, MYL4, PDE5A, PIK3CA, PIK3CG, RNF207, SCN2B, SCN5A, SGCD, TCAP, TNNI3, TNNT1, TNNT2, TPM1]
GO:0006942	regulation of striated muscle contraction	GO_BiologicalProcess-EBI-UniProt-GOA_27.02.2019_00h00	3.69633e-06	0.00640204	9.56376e-16	1.14765e-14	[6, 7]	Group16	15.9664	19	[ANK2, ATP1A2, CASQ1, CTNNA3, DLG1, EHD2, FPGT-TNNI3K, HRC, KCNQ1, MYBPC3, MYH7, MYL2, MYL3, PDE5A, PIK3CG, RNF207, SCN5A, TNNI1, TNNI3]
GO:0055008	cardiac muscle tissue morphogenesis	GO_BiologicalProcess-EBI-UniProt-GOA_27.02.2019_00h00	4.85013e-08	8.61868e-05	9.56376e-16	1.14765e-14	[5, 6, 7, 8, 9]	Group16	20.8791	19	[ACKR3, ACTC1, COL11A1, HERPUD1, MBD4, MYBPC3, MYH6, MYH7, MYL2, MYL3, MYOM1, PEBP1, TBX20, TCAP, TNNI1, TNNI3, TNNT2, TPM1, UBE4B]
GO:0055010	ventricular cardiac muscle tissue morphogenesis	GO_BiologicalProcess-EBI-UniProt-GOA_27.02.2019_00h00	4.78988e-07	0.000842541	9.56376e-16	1.14765e-14	[5, 6, 7, 8, 9, 10]	Group16	22.3881	15	[ACKR3, COL11A1, HERPUD1, MBD4, MYBPC3, MYH6, MYH7, MYL2, MYL3, PEBP1, TNNI1, TNNI3, TNNT2, TPM1, UBE4B]
GO:0007275	multicellular organism development	GO_BiologicalProcess-EBI-UniProt-GOA_27.02.2019_00h00	2.52313e-13	4.61733e-10	7.05726e-13	7.05726e-12	[2, 3]	Group17	6.42525	401	[AARS, ABAT, ACKR3, ACKR4, ACTA1, ACTA2, ACTB, ACTC1, ACTG2, ACVRL1, ADAMTS12, ADAMTS4, ADAMTS6, ADCY6, ADGRA2, ADGRF5, AGO1, AGO4, AKAP13, ANGPT1, ANGPT2, ANK2, ANLN, ANXA1, ANXA6, APLN, APLNR, APOLD1, APP, ARHGAP11B, ARHGAP33, ARHGDIB, ARID2, ARRB1, ASPM, ASPN, ATM, ATRNL1, AURKB, BCHE, BCL2, BICC1, BLM, BRCA2, BRD8, BRIP1, CALCRL, CASQ1, CC2D2A, CCDC6, CCNA2, CCNB1, CCNF, CD34, CDC20, CDC27, C…
GO:0009653	anatomical structure morphogenesis	GO_BiologicalProcess-EBI-UniProt-GOA_27.02.2019_00h00	1.15308e-13	2.11244e-10	7.05726e-13	7.05726e-12	[2, 3]	Group17	7.49606	238	[ACKR3, ACTA1, ACTA2, ACTC1, ACTG1, ACTG2, ACVRL1, ADAMTS12, ADGRA2, ADGRF5, AGO1, AGO4, AKAP13, ANGPT1, ANGPT2, ANK2, ANXA1, ANXA6, APLN, APLNR, APOLD1, APP, ARHGAP18, ARHGAP33, ARID2, ASPN, BCL2, BRCA2, BRD8, CALCRL, CAP2, CASQ1, CC2D2A, CCDC6, CCNA2, CD34, CDH19, CDH5, CDKL5, CEP290, CLEC14A, COL11A1, COL15A1, COL1A2, COL21A1, COL4A1, COL4A2, COL5A2, COL6A3, CPLANE1, CPNE5, CRIP2, CXCR4, DCHS1…
GO:0050793	regulation of developmental process	GO_BiologicalProcess-EBI-UniProt-GOA_27.02.2019_00h00	5.3406e-06	0.00921253	7.05726e-13	7.05726e-12	[2, 3]	Group17	6.42405	203	[ACKR3, ACVRL1, ADAMTS12, ADCY6, ADGRA2, AGO1, AGO4, AKAP13, ANGPT2, ANXA1, APLNR, APOLD1, APP, ARHGAP18, ARHGAP33, ARHGDIB, ASPM, ASPN, BCL2, BRCA2, BRD8, CCDC6, CCNA2, CCNB1, CD34, CDC20, CDH5, CDK1, CDKL5, CENPF, COL4A2, COL5A2, CPNE5, CXCR4, DDAH2, DDX17, DENND5A, DISC1, DLC1, DLG1, DOCK1, DPYSL2, DPYSL3, DTL, DUSP26, ECT2, EDN1, EEF1A2, EFNB3, EHD2, EIF2AK2, EPS8, ETS1, FANCA, FANCD2, FBN1, …
GO:0051239	regulation of multicellular organismal process	GO_BiologicalProcess-EBI-UniProt-GOA_27.02.2019_00h00	1.52909e-06	0.00266521	7.05726e-13	7.05726e-12	[2, 3]	Group17	6.3261	239	[ABAT, ACKR3, ACVRL1, ADAMTS12, ADCY6, ADGRA2, AFAP1L2, AGO1, AGO4, ALDOC, ANGPT1, ANGPT2, ANK2, ANXA1, ANXA6, APLN, APLNR, APOLD1, APP, ARHGAP33, ARHGDIB, ARRB1, ASPM, ASPN, ATP1A2, ATP1B2, BCL2, BRCA2, BRD8, CALCRL, CARD8, CASQ1, CCDC6, CCNA2, CCNB1, CD34, CDC20, CDH5, CDK1, CDKL5, CENPF, COL4A2, COL5A2, CORIN, CPAMD8, CPNE5, CTNNA3, CTNND1, CXCR4, DDAH2, DDX17, DENND5A, DISC1, DLG1, DOCK1, DOC…
GO:0009888	tissue development	GO_BiologicalProcess-EBI-UniProt-GOA_27.02.2019_00h00	7.77476e-09	1.39401e-05	7.05726e-13	7.05726e-12	[3]	Group17	7.24166	178	[ACKR3, ACTA1, ACTA2, ACTC1, ACTG2, ACVRL1, ADAMTS12, AKAP13, ALDOC, ANXA1, ANXA6, APOLD1, ARID2, ARRB1, ASPM, ASPN, BCL2, BDH2, BRCA2, CASQ1, CC2D2A, CCDC6, CCNA2, CCNB1, CD34, CDC27, CDH19, CDH5, CDK1, CENPF, CEP290, COL11A1, COL1A2, COL21A1, COL4A1, COL4A2, COL5A2, COL6A3, CORIN, CPLANE1, CRIP2, DCHS1, DDX17, DLC1, DLG1, DYSF, EDA, EDN1, EMP1, EXOC4, FANCD2, FBXO5, FBXW8, FMNL3, FN1, FZD4, GAR…
GO:0030154	cell differentiation	GO_BiologicalProcess-EBI-UniProt-GOA_27.02.2019_00h00	1.16325e-06	0.00203337	7.05726e-13	7.05726e-12	[3]	Group17	6.08589	299	[ACAT2, ACKR3, ACTA1, ACTA2, ACTC1, ACTG1, ACVRL1, ADAMTS12, ADCY6, ADGRA2, ADGRF5, AGO1, AGO4, AKAP13, ALDOC, ANGPT1, ANGPT2, ANK2, ANLN, ANXA1, ANXA6, APLNR, APOLD1, APP, ARHGAP33, ARRB1, ASPM, ATM, BBS9, BCAP29, BCHE, BCL2, BDH2, BLM, BRCA2, BRIP1, CASQ1, CCDC6, CCNA2, CCNB1, CD34, CDC20, CDH19, CDH5, CDK1, CDKL5, CENPF, CENPU, CEP290, CEP57, CIT, CLIP3, COL11A1, COL15A1, COL21A1, COL4A1, COL4…
GO:0048646	anatomical structure formation involved in morphogenesis	GO_BiologicalProcess-EBI-UniProt-GOA_27.02.2019_00h00	4.40551e-18	8.11495e-15	7.05726e-13	7.05726e-12	[2, 3, 4]	Group17	10.2507	139	[ACKR3, ACTA1, ACTC1, ACTG1, ACVRL1, ADGRA2, AGO1, AKAP13, ANGPT1, ANGPT2, ANK2, ANXA1, APLN, APLNR, APOLD1, BRD8, CALCRL, CASQ1, CC2D2A, CCDC6, CCNA2, CD34, CDH19, CDH5, CEP290, CLEC14A, COL11A1, COL15A1, COL4A1, COL4A2, COL5A2, DCHS1, DDAH2, DLC1, DYSF, EDA, EDN1, EHD2, ESM1, ETS1, EXOC4, FMNL3, FN1, GARS, GTF2IP4, HDAC1, HERC1, HERPUD1, HEYL, HGF, HIF3A, HOPX, IFT172, INTS3, ITGA4, ITGA8, KCNQ…
GO:0009790	embryo development	GO_BiologicalProcess-EBI-UniProt-GOA_27.02.2019_00h00	3.95189e-07	0.000696718	7.05726e-13	7.05726e-12	[3, 4]	Group17	7.99677	99	[ACVRL1, ADGRF5, ANGPT1, APLN, APLNR, ARID2, BCHE, BRCA2, CC2D2A, CCDC6, CCNA2, CCNB1, CDH19, CDK1, CENPU, CEP290, CHEK1, COL11A1, COL4A2, COL5A2, CPLANE1, CUBN, DCHS1, DLC1, DLG1, EDN1, EXOC4, FANCD2, FBN1, FBXW8, FN1, GARS, GINS1, HDAC1, HERPUD1, HOPX, IFT172, INSR, ITGA4, ITGA8, KDR, KIF20B, LAMB1, LDB2, LOXL3, LRP4, LRP6, MBD4, MEGF8, MSH2, MYH6, NBN, NCAPG2, NEK2, NRK, NUSAP1, OCRL, PBX2, PC…
GO:0032989	cellular component morphogenesis	GO_BiologicalProcess-EBI-UniProt-GOA_27.02.2019_00h00	2.07309e-08	3.70254e-05	7.05726e-13	7.05726e-12	[3, 4]	Group17	8.08152	115	[ACKR3, ACTA1, ACTC1, ACTG1, AGO4, AKAP13, ANK2, ANXA1, APP, ARHGAP18, ARHGAP33, BCL2, CAP2, CASQ1, CCDC6, CDH19, CDH5, CDKL5, COL21A1, COL6A3, CPNE5, CXCR4, DCHS1, DLC1, DLG1, DOCK1, DPYSL2, DTL, ECT2, EDN1, EFNB3, EPS8, EVL, FBXW8, FGD5, FMNL3, FN1, FYN, FZD4, GBP1, HECW2, HGF, INTS3, ITGA1, ITGA4, ITGA8, KDR, KIF14, KIF20B, KNL1, LAMB1, LDB3, LMOD1, LMOD2, LMOD3, LRP4, MBD4, MEGF8, MYBPC3, MYH…
GO:0035295	tube development	GO_BiologicalProcess-EBI-UniProt-GOA_27.02.2019_00h00	5.44155e-14	9.98525e-11	7.05726e-13	7.05726e-12	[3, 4]	Group17	9.60938	123	[ACKR3, ACVRL1, ADAMTS12, ADGRA2, ADGRF5, AGO1, ANGPT1, ANGPT2, ANXA1, APLN, APLNR, APOLD1, ARID2, BCL2, BRD8, BRIP1, CALCRL, CC2D2A, CCDC6, CCNA2, CCNB1, CD34, CDH19, CDH5, CEP290, CLEC14A, COL15A1, COL4A1, COL4A2, DCHS1, DDAH2, DHCR7, DLC1, DLG1, DYSF, EDA, EDN1, ESM1, ETS1, FMNL3, FN1, FZD4, GARS, GTF2IP4, HERPUD1, HEYL, HGF, HIF3A, HSPB11, IFT172, IGFBP5, INTS3, KCNQ1, KDR, KIF18A, KIF20B, KN…
GO:0048468	cell development	GO_BiologicalProcess-EBI-UniProt-GOA_27.02.2019_00h00	4.55831e-08	8.10924e-05	7.05726e-13	7.05726e-12	[3, 4]	Group17	7.0229	184	[ACKR3, ACTA1, ACTA2, ACTC1, ACTG1, ADCY6, ADGRA2, ADGRF5, AKAP13, ANGPT2, ANK2, ANXA6, APP, ARHGAP33, ASPM, BCL2, BRCA2, BRIP1, CASQ1, CCDC6, CCNB1, CDC20, CDH5, CDK1, CDKL5, CEP290, CEP57, COL11A1, COL21A1, COL6A3, CPNE5, CTDSPL, CXCR4, DENND5A, DGKG, DIAPH2, DISC1, DLC1, DOCK1, DPYSL2, DPYSL3, DUSP26, DYSF, ECT2, EDN1, EFNB3, EVL, FANCD2, FBN1, FBXO5, FBXW8, FMNL3, FN1, FYN, FZD4, GBP1, GPR173…
GO:0048729	tissue morphogenesis	GO_BiologicalProcess-EBI-UniProt-GOA_27.02.2019_00h00	2.8613e-09	5.14176e-06	7.05726e-13	7.05726e-12	[3, 4]	Group17	9.61071	79	[ACKR3, ACTA1, ACTA2, ACTC1, ACTG2, ACVRL1, ADAMTS12, BCL2, CC2D2A, CCDC6, CCNA2, CDH19, CEP290, COL11A1, COL21A1, COL4A1, COL6A3, CPLANE1, DCHS1, DLC1, DLG1, EDN1, EXOC4, FZD4, GARS, GPC6, HERPUD1, HEYL, HGF, IFT172, IGFBP5, INTS3, ITGA8, KIF20B, LGR4, LRP6, MBD4, MEGF8, MYBPC3, MYH6, MYH7, MYL2, MYL3, MYOM1, NOTCH4, PEBP1, PGF, PKD2, PLXND1, PODXL, PSMA7, RAB10, RASIP1, RNF207, RORA, SCARA3, SE…
GO:0048731	system development	GO_BiologicalProcess-EBI-UniProt-GOA_27.02.2019_00h00	8.37182e-12	1.522e-08	7.05726e-13	7.05726e-12	[3, 4]	Group17	6.44646	363	[AARS, ABAT, ACKR3, ACTA1, ACTA2, ACTB, ACTC1, ACTG2, ACVRL1, ADAMTS12, ADAMTS4, ADAMTS6, ADCY6, ADGRA2, ADGRF5, AGO1, AGO4, AKAP13, ANGPT1, ANGPT2, ANK2, ANLN, ANXA1, ANXA6, APLN, APLNR, APOLD1, APP, ARHGAP11B, ARHGAP33, ARID2, ARRB1, ASPM, ASPN, ATM, ATRNL1, BCHE, BCL2, BICC1, BLM, BRCA2, BRD8, BRIP1, CALCRL, CASQ1, CC2D2A, CCDC6, CCNA2, CCNB1, CCNF, CD34, CDC20, CDC27, CDH19, CDH5, CDK1, CDKL5…
GO:2000026	regulation of multicellular organismal development	GO_BiologicalProcess-EBI-UniProt-GOA_27.02.2019_00h00	1.63069e-06	0.00284066	7.05726e-13	7.05726e-12	[3, 4]	Group17	6.78571	171	[ACKR3, ACVRL1, ADAMTS12, ADCY6, ADGRA2, AGO1, AGO4, ANGPT2, ANXA1, APLNR, APOLD1, APP, ARHGAP33, ARHGDIB, ASPM, ASPN, BCL2, BRCA2, BRD8, CCDC6, CCNA2, CCNB1, CD34, CDC20, CDH5, CDK1, CDKL5, CENPF, COL4A2, COL5A2, CPNE5, CXCR4, DDAH2, DDX17, DENND5A, DISC1, DLG1, DPYSL2, DPYSL3, DUSP26, ECT2, EDN1, EEF1A2, EFNB3, EIF2AK2, ETS1, FANCA, FANCD2, FBN1, FBXO5, FBXW8, FN1, FYN, FZD4, GARS, GPC6, GPR173…
GO:0035239	tube morphogenesis	GO_BiologicalProcess-EBI-UniProt-GOA_27.02.2019_00h00	1.75586e-14	3.22552e-11	7.05726e-13	7.05726e-12	[3, 4, 5]	Group17	10.3946	108	[ACKR3, ACVRL1, ADAMTS12, ADGRA2, ADGRF5, AGO1, ANGPT1, ANGPT2, ANXA1, APLN, APLNR, APOLD1, ARID2, BCL2, BRD8, CALCRL, CC2D2A, CCDC6, CCNA2, CD34, CDH19, CDH5, CEP290, CLEC14A, COL15A1, COL4A1, COL4A2, DCHS1, DDAH2, DLC1, DLG1, DYSF, EDA, EDN1, ESM1, ETS1, FMNL3, FN1, FZD4, GARS, GTF2IP4, HERPUD1, HGF, HIF3A, IFT172, INTS3, KCNQ1, KDR, KIF20B, LGR4, LOX, LRP4, LRP6, MBD4, MCAM, MEGF8, MINAR1, MYO…
GO:0048513	animal organ development	GO_BiologicalProcess-EBI-UniProt-GOA_27.02.2019_00h00	1.65357e-07	0.000292185	7.05726e-13	7.05726e-12	[3, 4, 5]	Group17	6.34584	269	[AARS, ABAT, ACKR3, ACTA1, ACTA2, ACTB, ACTC1, ACTG2, ACVRL1, ADAMTS12, ADAMTS6, ADGRF5, AGO1, AGO4, AKAP13, ANGPT1, ANGPT2, ANK2, ANLN, ANXA1, ANXA6, APLN, APLNR, APP, ARHGAP11B, ARID2, ARRB1, ASPM, ASPN, ATM, ATRNL1, BCL2, BICC1, BLM, BRCA2, BRIP1, CALCRL, CASQ1, CC2D2A, CCDC6, CCNA2, CCNB1, CCNF, CD34, CDC27, CDH19, CDK1, CENPF, CEP290, CIT, CNN2, COL11A1, COL1A2, COL21A1, COL4A1, COL5A2, COL6…
GO:0060537	muscle tissue development	GO_BiologicalProcess-EBI-UniProt-GOA_27.02.2019_00h00	8.24798e-08	0.000145989	7.05726e-13	7.05726e-12	[4]	Group17	10.3189	55	[ACKR3, ACTA1, ACTC1, AKAP13, ARID2, ARRB1, ASPM, BCL2, CASQ1, CCNB1, CDK1, CENPF, COL11A1, DDX17, DLG1, EDN1, FMNL3, GARS, HERPUD1, HEYL, HMGCR, IGFBP5, ITGA8, LMOD3, LOX, LRRC10, MBD4, MYBPC3, MYH11, MYH6, MYH7, MYL2, MYL3, MYL6B, MYOCD, MYOM1, NEBL, NUPR1, PCSK1, PDGFRB, PDZD2, PEBP1, PGM5, PKD2, RALBP1, SGCD, SIRT2, SMO, TBX20, TCAP, TNNI1, TNNI3, TNNT2, TPM1, UBE4B]
GO:0009887	animal organ morphogenesis	GO_BiologicalProcess-EBI-UniProt-GOA_27.02.2019_00h00	5.77416e-06	0.00995465	7.05726e-13	7.05726e-12	[3, 4, 5, 6]	Group17	7.60095	96	[ACKR3, ACTA1, ACTA2, ACTC1, ACTG2, ACVRL1, ANXA6, ARID2, ASPN, BCL2, BRCA2, CCNA2, CD34, CDH19, CEP290, COL11A1, COL1A2, COL21A1, COL5A2, COL6A3, CRIP2, CXCR4, DCHS1, DLC1, DLG1, EDA, EDN1, EVL, EXOC4, FANCD2, FBN1, FZD4, GPC6, HDAC1, HERPUD1, HEYL, HGF, IFT172, IGFBP5, INSR, ITGA8, LAMB1, LGR4, LRP4, LRP6, MBD4, MEGF8, MYBPC3, MYH6, MYH7, MYL2, MYL3, MYOM1, NFIB, NFIC, PDGFRB, PEBP1, PGF, PKD2,…
GO:0072359	circulatory system development	GO_BiologicalProcess-EBI-UniProt-GOA_27.02.2019_00h00	1.71486e-21	3.16906e-18	7.05726e-13	7.05726e-12	[4, 5]	Group17	10.8327	147	[ACKR3, ACTA2, ACTC1, ACVRL1, ADAMTS6, ADGRA2, ADGRF5, AGO1, AKAP13, ANGPT1, ANGPT2, ANK2, ANXA1, APLN, APLNR, APOLD1, ARID2, ARRB1, ASPM, ATRNL1, BICC1, BRD8, CALCRL, CC2D2A, CCNA2, CCNB1, CD34, CDH19, CDH5, CDK1, CLEC14A, COL11A1, COL15A1, COL1A2, COL4A1, COL4A2, CPLANE1, CRIP2, CXCR4, DCHS1, DDAH2, DHCR7, DLC1, DYSF, EDN1, ESM1, ETS1, FBN1, FBXW8, FGF12, FMNL3, FN1, FZD4, GARS, GJA4, GTF2IP4, …
GO:0007507	heart development	GO_BiologicalProcess-EBI-UniProt-GOA_27.02.2019_00h00	1.64702e-11	2.98934e-08	7.05726e-13	7.05726e-12	[4, 5, 6]	Group17	10.6952	80	[ACKR3, ACTC1, ACVRL1, ADAMTS6, AKAP13, ANK2, APLN, APLNR, ARID2, ARRB1, ASPM, ATRNL1, BICC1, CALCRL, CC2D2A, CCNA2, CCNB1, CDH19, CDK1, COL11A1, CPLANE1, CRIP2, CXCR4, DCHS1, DLC1, EDN1, FBN1, FGF12, FMNL3, GARS, HERPUD1, HEYL, HSPB11, IFT172, INSR, LOX, LRP6, LRRC10, LTBP1, MBD4, MEGF8, MYBPC3, MYH11, MYH6, MYH7, MYL2, MYL3, MYOCD, MYOM1, NEBL, NFATC1, PDGFRB, PDZD2, PEBP1, PHIP, PKD2, PLCE1, P…
GO:0072358	cardiovascular system development	GO_BiologicalProcess-EBI-UniProt-GOA_27.02.2019_00h00	7.68268e-16	1.41361e-12	7.05726e-13	7.05726e-12	[4, 5, 6]	Group17	11.274	100	[ACKR3, ACTA2, ACVRL1, ADAMTS6, ADGRA2, ADGRF5, AGO1, ANGPT1, ANGPT2, ANXA1, APLN, APLNR, APOLD1, ARID2, BRD8, CALCRL, CCNA2, CD34, CDH5, CLEC14A, COL15A1, COL1A2, COL4A1, COL4A2, CPLANE1, DDAH2, DHCR7, DYSF, EDN1, ESM1, ETS1, FBXW8, FMNL3, FN1, FZD4, GARS, GJA4, GTF2IP4, HERPUD1, HEYL, HGF, HIF3A, INTS3, KCNQ1, KDR, LOX, LOXL3, LRP4, LTBP1, MBD4, MCAM, MEGF8, MINAR1, MYOCD, NFATC1, NFATC2, NOTCH…
GO:0003007	heart morphogenesis	GO_BiologicalProcess-EBI-UniProt-GOA_27.02.2019_00h00	3.61144e-07	0.000637058	7.05726e-13	7.05726e-12	[4, 5, 6, 7]	Group17	11.9122	38	[ACKR3, ACTC1, ACVRL1, ARID2, CCNA2, CDH19, COL11A1, CXCR4, DCHS1, DLC1, HERPUD1, HEYL, IFT172, INSR, MBD4, MEGF8, MYBPC3, MYH6, MYH7, MYL2, MYL3, MYOM1, PEBP1, PKD2, PLXND1, RNF207, SMO, SOX4, STIL, TBX20, TCAP, TEAD2, TEK, TNNI1, TNNI3, TNNT2, TPM1, UBE4B]
GO:0001568	blood vessel development	GO_BiologicalProcess-EBI-UniProt-GOA_27.02.2019_00h00	1.75443e-15	3.2264e-12	7.05726e-13	7.05726e-12	[3, 5, 6, 7, 8]	Group17	11.415	96	[ACKR3, ACTA2, ACVRL1, ADAMTS6, ADGRA2, ADGRF5, AGO1, ANGPT1, ANGPT2, ANXA1, APLN, APLNR, APOLD1, ARID2, BRD8, CALCRL, CCNA2, CD34, CDH5, CLEC14A, COL15A1, COL1A2, COL4A1, COL4A2, CPLANE1, DDAH2, DHCR7, DYSF, EDN1, ESM1, ETS1, FBXW8, FMNL3, FN1, FZD4, GARS, GJA4, GTF2IP4, HERPUD1, HEYL, HGF, HIF3A, INTS3, KCNQ1, KDR, LOX, LOXL3, LRP4, LTBP1, MBD4, MCAM, MEGF8, MINAR1, MYOCD, NOTCH3, NOTCH4, PBK, …
GO:0001525	angiogenesis	GO_BiologicalProcess-EBI-UniProt-GOA_27.02.2019_00h00	4.32722e-12	7.87121e-09	7.05726e-13	7.05726e-12	[3, 4, 5, 6, 7, 8, 9, 10]	Group17	11.442	73	[ACKR3, ACVRL1, ADGRA2, AGO1, ANGPT1, ANGPT2, ANXA1, APLN, APLNR, APOLD1, BRD8, CALCRL, CCNA2, CD34, CDH5, CLEC14A, COL15A1, COL4A1, COL4A2, DDAH2, DYSF, EDN1, ESM1, ETS1, FMNL3, FN1, GARS, GTF2IP4, HGF, HIF3A, INTS3, KCNQ1, KDR, LRP4, MBD4, MCAM, MINAR1, NOTCH3, NOTCH4, PBK, PDGFRB, PEBP1, PECAM1, PGF, PIK3CA, PIK3CG, PKD2, PLXND1, PPP1R16B, PRCP, PSMA7, RAMP2, RAPGEF3, RASIP1, RHOJ, ROBO4, RORA…
GO:0048514	blood vessel morphogenesis	GO_BiologicalProcess-EBI-UniProt-GOA_27.02.2019_00h00	2.55712e-13	4.67697e-10	7.05726e-13	7.05726e-12	[4, 5, 6, 7, 8, 9]	Group17	11.245	84	[ACKR3, ACVRL1, ADGRA2, ADGRF5, AGO1, ANGPT1, ANGPT2, ANXA1, APLN, APLNR, APOLD1, ARID2, BRD8, CALCRL, CCNA2, CD34, CDH5, CLEC14A, COL15A1, COL4A1, COL4A2, DDAH2, DYSF, EDN1, ESM1, ETS1, FMNL3, FN1, FZD4, GARS, GTF2IP4, HERPUD1, HGF, HIF3A, INTS3, KCNQ1, KDR, LOX, LRP4, MBD4, MCAM, MINAR1, MYOCD, NOTCH3, NOTCH4, PBK, PDGFRB, PEBP1, PECAM1, PGF, PIK3CA, PIK3CG, PKD2, PLXND1, PPP1R16B, PRCP, PSMA7,…
GO:0009888	tissue development	GO_BiologicalProcess-EBI-UniProt-GOA_27.02.2019_00h00	7.77476e-09	1.39401e-05	8.11863e-23	1.46135e-21	[3]	Group18	7.24166	178	[ACKR3, ACTA1, ACTA2, ACTC1, ACTG2, ACVRL1, ADAMTS12, AKAP13, ALDOC, ANXA1, ANXA6, APOLD1, ARID2, ARRB1, ASPM, ASPN, BCL2, BDH2, BRCA2, CASQ1, CC2D2A, CCDC6, CCNA2, CCNB1, CD34, CDC27, CDH19, CDH5, CDK1, CENPF, CEP290, COL11A1, COL1A2, COL21A1, COL4A1, COL4A2, COL5A2, COL6A3, CORIN, CPLANE1, CRIP2, DCHS1, DDX17, DLC1, DLG1, DYSF, EDA, EDN1, EMP1, EXOC4, FANCD2, FBXO5, FBXW8, FMNL3, FN1, FZD4, GAR…
GO:0061061	muscle structure development	GO_BiologicalProcess-EBI-UniProt-GOA_27.02.2019_00h00	9.09393e-10	1.63782e-06	8.11863e-23	1.46135e-21	[3]	Group18	9.81818	81	[ACKR3, ACTA1, ACTC1, ACTG1, AKAP13, ANK2, ARRB1, ASPM, BCL2, CASQ1, CCNB1, CDK1, CENPF, COL11A1, COL6A3, DDX17, DYSF, EDN1, EHD2, FBXO40, FKTN, FMNL3, HERPUD1, HEYL, HMGCR, IGFBP5, ITGA8, LDB3, LMOD1, LMOD2, LMOD3, LOX, LRRC10, MAP3K5, MBD4, MYBPC3, MYH11, MYH6, MYH7, MYL2, MYL3, MYL6B, MYOCD, MYOF, MYOM1, NEBL, NFATC1, NFATC2, NUPR1, OBSCN, PCSK1, PDGFRB, PDZD2, PEBP1, PGM5, RALBP1, RAMP2, RORA…
GO:0097435	supramolecular fiber organization	GO_BiologicalProcess-EBI-UniProt-GOA_27.02.2019_00h00	1.9126e-15	3.51535e-12	8.11863e-23	1.46135e-21	[3]	Group18	11.3054	97	[ACTA1, ACTC1, ACTG1, ADD3, AKAP13, APP, ARHGAP18, ARRB1, ATRNL1, BCL2, CAP2, CASQ1, CGNL1, CIT, CKAP2, CLIP3, COL11A1, COL1A2, COL5A2, CTNND1, DIAPH2, DIAPH3, DLC1, DLG1, DPYSL3, EDN1, EEF1A2, EPS8, EVL, FBXO5, FMNL3, FYN, HCLS1, HIP1, IFT172, JAK2, KIF18A, KIF18B, KIF2C, KLHL24, LDB3, LIMCH1, LMOD1, LMOD2, LMOD3, LOX, LOXL3, MECOM, MYBPC3, MYH11, MYH6, MYL2, MYOM1, NCAPG, NEBL, NIN, OBSCN, PDGF…
GO:0032970	regulation of actin filament-based process	GO_BiologicalProcess-EBI-UniProt-GOA_27.02.2019_00h00	7.9275e-08	0.000140396	8.11863e-23	1.46135e-21	[3, 4]	Group18	10.5906	52	[ADD3, AKAP13, ANK2, ARHGAP18, ARHGDIB, ATP1A2, CIT, CNN2, CTNNA3, DLC1, DLG1, ECT2, EDN1, EEF1A2, EPS8, EVL, FMNL3, HCLS1, LIMCH1, LMOD1, LMOD2, LMOD3, MECOM, MYBPC3, NCAPG, PDGFRB, PLEKHG2, PLP1, PREX1, PRKN, PXDN, RAPGEF3, RHOJ, RICTOR, RNF207, SCN5A, SEMA4C, SFRP1, SHANK3, SNX9, SORBS3, STMN1, SYNPO2, TEK, TMOD2, TMSB4X, TNNI3, TNNT2, TPM1, TTC8, TWF1, WHAMMP3]
GO:0048729	tissue morphogenesis	GO_BiologicalProcess-EBI-UniProt-GOA_27.02.2019_00h00	2.8613e-09	5.14176e-06	8.11863e-23	1.46135e-21	[3, 4]	Group18	9.61071	79	[ACKR3, ACTA1, ACTA2, ACTC1, ACTG2, ACVRL1, ADAMTS12, BCL2, CC2D2A, CCDC6, CCNA2, CDH19, CEP290, COL11A1, COL21A1, COL4A1, COL6A3, CPLANE1, DCHS1, DLC1, DLG1, EDN1, EXOC4, FZD4, GARS, GPC6, HERPUD1, HEYL, HGF, IFT172, IGFBP5, INTS3, ITGA8, KIF20B, LGR4, LRP6, MBD4, MEGF8, MYBPC3, MYH6, MYH7, MYL2, MYL3, MYOM1, NOTCH4, PEBP1, PGF, PKD2, PLXND1, PODXL, PSMA7, RAB10, RASIP1, RNF207, RORA, SCARA3, SE…
GO:0010927	cellular component assembly involved in morphogenesis	GO_BiologicalProcess-EBI-UniProt-GOA_27.02.2019_00h00	3.18941e-11	5.77922e-08	8.11863e-23	1.46135e-21	[3, 4, 5]	Group18	20.2797	29	[ACTA1, ACTC1, ACTG1, AKAP13, ANK2, CASQ1, EDN1, FMNL3, KNL1, LDB3, LMOD1, LMOD2, LMOD3, MYBPC3, MYH11, MYH6, MYL2, MYOM1, NEBL, OBSCN, PDGFRB, PGM5, PHLDB1, PIKFYVE, TCAP, TMOD2, TNNT1, TNNT2, TPM1]
GO:0030036	actin cytoskeleton organization	GO_BiologicalProcess-EBI-UniProt-GOA_27.02.2019_00h00	8.84538e-14	1.62224e-10	8.11863e-23	1.46135e-21	[3, 5]	Group18	10.9134	92	[ACTA1, ACTB, ACTC1, ACTG1, ADD3, AKAP13, ANLN, ANXA1, ARHGAP18, ARHGDIB, ARRB1, ATRNL1, BCL2, CAP2, CASQ1, CGNL1, CIT, CNN2, CTNND1, DIAPH2, DIAPH3, DLC1, DLG1, DPYSL3, ECT2, EDN1, EEF1A2, EHD2, ELMO1, EPB41L2, EPS8, EVL, FGD5, FMNL3, GAS2L3, HCLS1, HIP1, INF2, JAK2, KIF23, LDB3, LIMCH1, LMOD1, LMOD2, LMOD3, MECOM, MYBPC3, MYH11, MYH6, MYL2, MYOM1, NCAPG, NEBL, NRK, OBSCN, PDGFRB, PGM5, PLEKHG2,…
GO:0042692	muscle cell differentiation	GO_BiologicalProcess-EBI-UniProt-GOA_27.02.2019_00h00	1.11942e-09	2.01495e-06	8.11863e-23	1.46135e-21	[4]	Group18	11.7647	54	[ACTA1, ACTC1, ACTG1, AKAP13, ANK2, ARRB1, ASPM, BCL2, CASQ1, CCNB1, CDK1, DYSF, EDN1, EHD2, FBXO40, FMNL3, HERPUD1, IGFBP5, ITGA8, LDB3, LMOD1, LMOD2, LMOD3, LOX, LRRC10, MYBPC3, MYH11, MYH6, MYL2, MYOCD, MYOF, MYOM1, NEBL, NFATC1, NFATC2, OBSCN, PDGFRB, PDZD2, PGM5, RAMP2, RORA, SEMA4C, SGCD, SMO, SORT1, SPEG, SYNE1, TCAP, TMEM204, TMOD2, TNNT1, TNNT2, TPM1, ZEB1]
GO:0060537	muscle tissue development	GO_BiologicalProcess-EBI-UniProt-GOA_27.02.2019_00h00	8.24798e-08	0.000145989	8.11863e-23	1.46135e-21	[4]	Group18	10.3189	55	[ACKR3, ACTA1, ACTC1, AKAP13, ARID2, ARRB1, ASPM, BCL2, CASQ1, CCNB1, CDK1, CENPF, COL11A1, DDX17, DLG1, EDN1, FMNL3, GARS, HERPUD1, HEYL, HMGCR, IGFBP5, ITGA8, LMOD3, LOX, LRRC10, MBD4, MYBPC3, MYH11, MYH6, MYH7, MYL2, MYL3, MYL6B, MYOCD, MYOM1, NEBL, NUPR1, PCSK1, PDGFRB, PDZD2, PEBP1, PGM5, PKD2, RALBP1, SGCD, SIRT2, SMO, TBX20, TCAP, TNNI1, TNNI3, TNNT2, TPM1, UBE4B]
GO:0070252	actin-mediated cell contraction	GO_BiologicalProcess-EBI-UniProt-GOA_27.02.2019_00h00	2.12312e-10	3.83648e-07	8.11863e-23	1.46135e-21	[4]	Group18	20	27	[ACTA1, ACTC1, ANK2, ATP1A2, CTNNA3, DLG1, ERG, FGF12, KCNQ1, MYBPC3, MYH6, MYH7, MYL2, MYL3, MYL4, MYL6B, RNF207, SCN2B, SCN5A, SGCD, TCAP, TNNI1, TNNI3, TNNT1, TNNT2, TPM1, TPM4]
GO:0009887	animal organ morphogenesis	GO_BiologicalProcess-EBI-UniProt-GOA_27.02.2019_00h00	5.77416e-06	0.00995465	8.11863e-23	1.46135e-21	[3, 4, 5, 6]	Group18	7.60095	96	[ACKR3, ACTA1, ACTA2, ACTC1, ACTG2, ACVRL1, ANXA6, ARID2, ASPN, BCL2, BRCA2, CCNA2, CD34, CDH19, CEP290, COL11A1, COL1A2, COL21A1, COL5A2, COL6A3, CRIP2, CXCR4, DCHS1, DLC1, DLG1, EDA, EDN1, EVL, EXOC4, FANCD2, FBN1, FZD4, GPC6, HDAC1, HERPUD1, HEYL, HGF, IFT172, IGFBP5, INSR, ITGA8, LAMB1, LGR4, LRP4, LRP6, MBD4, MEGF8, MYBPC3, MYH6, MYH7, MYL2, MYL3, MYOM1, NFIB, NFIC, PDGFRB, PEBP1, PGF, PKD2,…
GO:0055001	muscle cell development	GO_BiologicalProcess-EBI-UniProt-GOA_27.02.2019_00h00	1.31463e-12	2.39788e-09	8.11863e-23	1.46135e-21	[4, 5]	Group18	17.316	40	[ACTA1, ACTC1, ACTG1, AKAP13, ANK2, ASPM, BCL2, CASQ1, CCNB1, CDK1, DYSF, EDN1, FMNL3, HERPUD1, LDB3, LMOD1, LMOD2, LMOD3, LOX, LRRC10, MYBPC3, MYH11, MYH6, MYL2, MYOF, MYOM1, NEBL, NFATC2, OBSCN, PDGFRB, PDZD2, PGM5, RAMP2, SGCD, SMO, TCAP, TMOD2, TNNT1, TNNT2, TPM1]
GO:0072359	circulatory system development	GO_BiologicalProcess-EBI-UniProt-GOA_27.02.2019_00h00	1.71486e-21	3.16906e-18	8.11863e-23	1.46135e-21	[4, 5]	Group18	10.8327	147	[ACKR3, ACTA2, ACTC1, ACVRL1, ADAMTS6, ADGRA2, ADGRF5, AGO1, AKAP13, ANGPT1, ANGPT2, ANK2, ANXA1, APLN, APLNR, APOLD1, ARID2, ARRB1, ASPM, ATRNL1, BICC1, BRD8, CALCRL, CC2D2A, CCNA2, CCNB1, CD34, CDH19, CDH5, CDK1, CLEC14A, COL11A1, COL15A1, COL1A2, COL4A1, COL4A2, CPLANE1, CRIP2, CXCR4, DCHS1, DDAH2, DHCR7, DLC1, DYSF, EDN1, ESM1, ETS1, FBN1, FBXW8, FGF12, FMNL3, FN1, FZD4, GARS, GJA4, GTF2IP4, …
GO:0006941	striated muscle contraction	GO_BiologicalProcess-EBI-UniProt-GOA_27.02.2019_00h00	4.26922e-10	7.70168e-07	8.11863e-23	1.46135e-21	[5]	Group18	15.8371	35	[ACTC1, ANK2, ATP1A2, CASQ1, CTNNA3, DLG1, DPYSL3, EHD2, ERG, FGF12, FPGT-TNNI3K, FYN, HRC, KCNQ1, LMOD3, MYBPC3, MYH6, MYH7, MYL2, MYL3, MYL4, PDE5A, PIK3CA, PIK3CG, RCSD1, RNF207, SCN2B, SCN5A, SGCD, TCAP, TNNI1, TNNI3, TNNT1, TNNT2, TPM1]
GO:0007015	actin filament organization	GO_BiologicalProcess-EBI-UniProt-GOA_27.02.2019_00h00	1.17787e-10	2.13076e-07	8.11863e-23	1.46135e-21	[4, 6]	Group18	11.6635	61	[ACTA1, ACTC1, ADD3, ARHGAP18, ARRB1, ATRNL1, BCL2, CAP2, CGNL1, CIT, CTNND1, DIAPH2, DIAPH3, DLC1, DLG1, DPYSL3, EEF1A2, EPS8, EVL, FMNL3, HCLS1, HIP1, JAK2, LIMCH1, LMOD1, LMOD2, LMOD3, MECOM, MYBPC3, MYOM1, NCAPG, NEBL, PLEKHG2, PLP1, PLSCR4, PREX1, PRKN, PXDN, RAPGEF3, RFLNB, RHOJ, RICTOR, RIN2, SEMA4C, SFRP1, SHANK3, SHROOM4, SNX9, SORBS1, SORBS3, STMN1, SYNPO2, TCAP, TMOD2, TMSB4X, TNNT2, T…
GO:0007507	heart development	GO_BiologicalProcess-EBI-UniProt-GOA_27.02.2019_00h00	1.64702e-11	2.98934e-08	8.11863e-23	1.46135e-21	[4, 5, 6]	Group18	10.6952	80	[ACKR3, ACTC1, ACVRL1, ADAMTS6, AKAP13, ANK2, APLN, APLNR, ARID2, ARRB1, ASPM, ATRNL1, BICC1, CALCRL, CC2D2A, CCNA2, CCNB1, CDH19, CDK1, COL11A1, CPLANE1, CRIP2, CXCR4, DCHS1, DLC1, EDN1, FBN1, FGF12, FMNL3, GARS, HERPUD1, HEYL, HSPB11, IFT172, INSR, LOX, LRP6, LRRC10, LTBP1, MBD4, MEGF8, MYBPC3, MYH11, MYH6, MYH7, MYL2, MYL3, MYOCD, MYOM1, NEBL, NFATC1, PDGFRB, PDZD2, PEBP1, PHIP, PKD2, PLCE1, P…
GO:0014706	striated muscle tissue development	GO_BiologicalProcess-EBI-UniProt-GOA_27.02.2019_00h00	9.2787e-07	0.00162656	8.11863e-23	1.46135e-21	[5]	Group18	9.90291	51	[ACKR3, ACTA1, ACTC1, AKAP13, ARID2, ARRB1, ASPM, BCL2, CASQ1, CCNB1, CDK1, CENPF, COL11A1, DDX17, EDN1, FMNL3, GARS, HERPUD1, HEYL, HMGCR, LMOD3, LOX, LRRC10, MBD4, MYBPC3, MYH11, MYH6, MYH7, MYL2, MYL3, MYL6B, MYOCD, MYOM1, NEBL, NUPR1, PCSK1, PDGFRB, PDZD2, PEBP1, PGM5, RALBP1, SGCD, SIRT2, SMO, TBX20, TCAP, TNNI1, TNNI3, TNNT2, TPM1, UBE4B]
GO:0031032	actomyosin structure organization	GO_BiologicalProcess-EBI-UniProt-GOA_27.02.2019_00h00	7.75323e-13	1.41574e-09	8.11863e-23	1.46135e-21	[4, 6]	Group18	16.9355	42	[ACTA1, ACTC1, ACTG1, AKAP13, ANLN, ARRB1, CASQ1, CNN2, DLC1, ECT2, EDN1, EPB41L2, EVL, FMNL3, KIF23, LDB3, LIMCH1, LMOD1, LMOD2, LMOD3, MYBPC3, MYH11, MYH6, MYL2, MYOM1, NEBL, OBSCN, PDGFRB, PGM5, PXDN, RACGAP1, RAPGEF3, SFRP1, SORBS1, SORBS3, STMN1, TCAP, TMOD2, TNNT1, TNNT2, TPM1, TTC8]
GO:0051146	striated muscle cell differentiation	GO_BiologicalProcess-EBI-UniProt-GOA_27.02.2019_00h00	7.489e-08	0.000132855	8.11863e-23	1.46135e-21	[5]	Group18	11.6848	43	[ACTA1, ACTC1, ACTG1, AKAP13, ARRB1, ASPM, BCL2, CASQ1, CCNB1, CDK1, DYSF, EDN1, EHD2, FMNL3, HERPUD1, IGFBP5, LDB3, LMOD1, LMOD2, LMOD3, LOX, LRRC10, MYBPC3, MYH11, MYH6, MYL2, MYOCD, MYOF, MYOM1, NEBL, NFATC2, OBSCN, PDGFRB, PDZD2, PGM5, SGCD, SMO, SORT1, TCAP, TMOD2, TNNT1, TNNT2, TPM1]
GO:0003205	cardiac chamber development	GO_BiologicalProcess-EBI-UniProt-GOA_27.02.2019_00h00	5.73229e-07	0.00100774	8.11863e-23	1.46135e-21	[3, 5, 6, 7]	Group18	13.3641	29	[ACKR3, ADAMTS6, ANK2, CCNA2, COL11A1, CPLANE1, HERPUD1, HEYL, LTBP1, MBD4, MYBPC3, MYH6, MYH7, MYL2, MYL3, MYOCD, PEBP1, PLXND1, SCN5A, SMO, SOX4, TBX20, TEK, TMEM65, TNNI1, TNNI3, TNNT2, TPM1, UBE4B]
GO:0003007	heart morphogenesis	GO_BiologicalProcess-EBI-UniProt-GOA_27.02.2019_00h00	3.61144e-07	0.000637058	8.11863e-23	1.46135e-21	[4, 5, 6, 7]	Group18	11.9122	38	[ACKR3, ACTC1, ACVRL1, ARID2, CCNA2, CDH19, COL11A1, CXCR4, DCHS1, DLC1, HERPUD1, HEYL, IFT172, INSR, MBD4, MEGF8, MYBPC3, MYH6, MYH7, MYL2, MYL3, MYOM1, PEBP1, PKD2, PLXND1, RNF207, SMO, SOX4, STIL, TBX20, TCAP, TEAD2, TEK, TNNI1, TNNI3, TNNT2, TPM1, UBE4B]
GO:0030049	muscle filament sliding	GO_BiologicalProcess-EBI-UniProt-GOA_27.02.2019_00h00	5.30353e-11	9.60469e-08	8.11863e-23	1.46135e-21	[5, 6]	Group18	37.2093	16	[ACTA1, ACTC1, MYBPC3, MYH6, MYH7, MYL2, MYL3, MYL4, MYL6B, TCAP, TNNI1, TNNI3, TNNT1, TNNT2, TPM1, TPM4]
GO:0030239	myofibril assembly	GO_BiologicalProcess-EBI-UniProt-GOA_27.02.2019_00h00	1.03504e-13	1.89723e-10	8.11863e-23	1.46135e-21	[4, 5, 6, 7]	Group18	29.4118	25	[ACTA1, ACTC1, ACTG1, AKAP13, CASQ1, EDN1, FMNL3, LDB3, LMOD1, LMOD2, LMOD3, MYBPC3, MYH11, MYH6, MYL2, MYOM1, NEBL, OBSCN, PDGFRB, PGM5, TCAP, TMOD2, TNNT1, TNNT2, TPM1]
GO:0055002	striated muscle cell development	GO_BiologicalProcess-EBI-UniProt-GOA_27.02.2019_00h00	2.16731e-12	3.94667e-09	8.11863e-23	1.46135e-21	[5, 6]	Group18	17.757	38	[ACTA1, ACTC1, ACTG1, AKAP13, ASPM, BCL2, CASQ1, CCNB1, CDK1, DYSF, EDN1, FMNL3, HERPUD1, LDB3, LMOD1, LMOD2, LMOD3, LOX, LRRC10, MYBPC3, MYH11, MYH6, MYL2, MYOF, MYOM1, NEBL, NFATC2, OBSCN, PDGFRB, PDZD2, PGM5, SGCD, SMO, TCAP, TMOD2, TNNT1, TNNT2, TPM1]
GO:0048738	cardiac muscle tissue development	GO_BiologicalProcess-EBI-UniProt-GOA_27.02.2019_00h00	9.75928e-07	0.00170885	8.11863e-23	1.46135e-21	[5, 6, 7]	Group18	11.6883	36	[ACKR3, ACTC1, AKAP13, ARID2, ARRB1, ASPM, CCNB1, CDK1, COL11A1, EDN1, FMNL3, GARS, HERPUD1, LRRC10, MBD4, MYBPC3, MYH11, MYH6, MYH7, MYL2, MYL3, MYOCD, MYOM1, NEBL, PDGFRB, PDZD2, PEBP1, RALBP1, SGCD, TBX20, TCAP, TNNI1, TNNI3, TNNT2, TPM1, UBE4B]
GO:0060048	cardiac muscle contraction	GO_BiologicalProcess-EBI-UniProt-GOA_27.02.2019_00h00	1.02334e-08	1.8328e-05	8.11863e-23	1.46135e-21	[6]	Group18	16.0221	29	[ACTC1, ANK2, ATP1A2, CTNNA3, DLG1, EHD2, ERG, FGF12, FPGT-TNNI3K, HRC, KCNQ1, MYBPC3, MYH6, MYH7, MYL2, MYL3, MYL4, PDE5A, PIK3CA, PIK3CG, RNF207, SCN2B, SCN5A, SGCD, TCAP, TNNI3, TNNT1, TNNT2, TPM1]
GO:0003231	cardiac ventricle development	GO_BiologicalProcess-EBI-UniProt-GOA_27.02.2019_00h00	1.29824e-06	0.00226673	8.11863e-23	1.46135e-21	[4, 6, 7, 8]	Group18	14.4578	24	[ACKR3, CCNA2, COL11A1, CPLANE1, HERPUD1, HEYL, LTBP1, MBD4, MYBPC3, MYH6, MYH7, MYL2, MYL3, MYOCD, PEBP1, SCN5A, SOX4, TBX20, TMEM65, TNNI1, TNNI3, TNNT2, TPM1, UBE4B]
GO:0003208	cardiac ventricle morphogenesis	GO_BiologicalProcess-EBI-UniProt-GOA_27.02.2019_00h00	4.30765e-07	0.000758577	8.11863e-23	1.46135e-21	[4, 5, 6, 7, 8, 9]	Group18	19.1489	18	[ACKR3, COL11A1, HERPUD1, HEYL, MBD4, MYBPC3, MYH6, MYH7, MYL2, MYL3, PEBP1, SOX4, TBX20, TNNI1, TNNI3, TNNT2, TPM1, UBE4B]
GO:0014866	skeletal myofibril assembly	GO_BiologicalProcess-EBI-UniProt-GOA_27.02.2019_00h00	4.4336e-06	0.0076657	8.11863e-23	1.46135e-21	[5, 6, 7, 8]	Group18	43.75	7	[ACTA1, ACTC1, LMOD3, MYBPC3, MYH11, MYOM1, TCAP]
GO:0045214	sarcomere organization	GO_BiologicalProcess-EBI-UniProt-GOA_27.02.2019_00h00	6.1718e-08	0.000109611	8.11863e-23	1.46135e-21	[5, 6, 7, 8]	Group18	25.8621	15	[ACTG1, AKAP13, CASQ1, EDN1, FMNL3, LDB3, LMOD2, MYBPC3, MYH6, MYOM1, OBSCN, TCAP, TNNT1, TNNT2, TPM1]
GO:0055008	cardiac muscle tissue morphogenesis	GO_BiologicalProcess-EBI-UniProt-GOA_27.02.2019_00h00	4.85013e-08	8.61868e-05	8.11863e-23	1.46135e-21	[5, 6, 7, 8, 9]	Group18	20.8791	19	[ACKR3, ACTC1, COL11A1, HERPUD1, MBD4, MYBPC3, MYH6, MYH7, MYL2, MYL3, MYOM1, PEBP1, TBX20, TCAP, TNNI1, TNNI3, TNNT2, TPM1, UBE4B]
GO:0055013	cardiac muscle cell development	GO_BiologicalProcess-EBI-UniProt-GOA_27.02.2019_00h00	4.75982e-06	0.0082202	8.11863e-23	1.46135e-21	[5, 6, 7, 8, 9]	Group18	15.7025	19	[ACTC1, AKAP13, ASPM, CCNB1, CDK1, EDN1, FMNL3, HERPUD1, LRRC10, MYBPC3, MYH11, MYH6, MYL2, MYOM1, NEBL, PDGFRB, PDZD2, SGCD, TCAP]
GO:0055010	ventricular cardiac muscle tissue morphogenesis	GO_BiologicalProcess-EBI-UniProt-GOA_27.02.2019_00h00	4.78988e-07	0.000842541	8.11863e-23	1.46135e-21	[5, 6, 7, 8, 9, 10]	Group18	22.3881	15	[ACKR3, COL11A1, HERPUD1, MBD4, MYBPC3, MYH6, MYH7, MYL2, MYL3, PEBP1, TNNI1, TNNI3, TNNT2, TPM1, UBE4B]
GO:0022402	cell cycle process	GO_BiologicalProcess-EBI-UniProt-GOA_27.02.2019_00h00	4.4903e-20	8.2891e-17	7.67956e-20	1.22873e-18	[2, 3]	Group19	9.79263	170	[ACKR3, AGO4, ANLN, ANXA1, APP, ASPM, ATM, AURKB, BCAT1, BCL2, BIRC5, BLM, BRCA2, BRIP1, BUB1, BUB1B, CBX5, CCDC69, CCNA2, CCNB1, CCNF, CCNG2, CCNY, CDC20, CDC25A, CDC27, CDC45, CDCA5, CDCA8, CDK1, CENPC, CENPE, CENPF, CEP290, CEP295, CEP55, CEP57, CEP85, CHAF1A, CHEK1, CIT, CKAP2, CLSPN, CRIP2, CTDSPL, DBF4, DLC1, DLG1, DLGAP5, DSN1, DTL, ECT2, EDN1, EPS8, FANCA, FANCD2, FBXO5, FN1, FOXM1, GINS1…
GO:0051321	meiotic cell cycle	GO_BiologicalProcess-EBI-UniProt-GOA_27.02.2019_00h00	7.81498e-08	0.000138482	7.67956e-20	1.22873e-18	[2, 3]	Group19	12.2257	39	[AGO4, ASPM, ATM, BLM, BRCA2, BRIP1, BUB1, BUB1B, CDC20, CDC25A, CENPC, CRIP2, CTDSPL, EXO1, FANCA, FANCD2, FBXO5, INSR, KIF18A, KLHDC3, MSH3, NBN, NCAPD3, NCAPH, NEK2, NUF2, PDE3A, PLK1, SIRT2, SMC2, SMC4, STAG3, TOP2A, TOP2B, TRIP13, TTK, TUBGCP3, WRN, XRCC2]
GO:0000278	mitotic cell cycle	GO_BiologicalProcess-EBI-UniProt-GOA_27.02.2019_00h00	1.45503e-27	2.69908e-24	7.67956e-20	1.22873e-18	[3]	Group19	11.9816	156	[AFAP1L2, ANLN, ANXA1, APP, ATM, AURKB, BCAT1, BCHE, BCL2, BIRC5, BLM, BRCA2, BRD8, BRIP1, BUB1, BUB1B, CCNA2, CCNB1, CCNF, CCNG2, CCNY, CDC20, CDC25A, CDC27, CDC45, CDCA5, CDCA8, CDK1, CDK19, CENPC, CENPE, CENPF, CEP290, CEP55, CEP57, CEP85, CHAF1A, CHEK1, CIT, CKAP2, CLSPN, CRIP2, CTDSPL, DBF4, DLC1, DLG1, DLGAP5, DSN1, DTL, ECT2, EDN1, EPS8, FANCD2, FBXO5, FOXM1, GINS1, GTSE1, HAUS4, HECW2, HG…
GO:1903046	meiotic cell cycle process	GO_BiologicalProcess-EBI-UniProt-GOA_27.02.2019_00h00	4.84987e-08	8.62308e-05	7.67956e-20	1.22873e-18	[2, 3, 4]	Group19	13.75	33	[AGO4, ASPM, ATM, BLM, BRCA2, BRIP1, BUB1, BUB1B, CDC20, CDC25A, CENPC, CRIP2, CTDSPL, FANCA, FANCD2, FBXO5, KIF18A, KLHDC3, MSH3, NCAPD3, NCAPH, NUF2, PDE3A, PLK1, SIRT2, SMC2, SMC4, STAG3, TOP2A, TOP2B, TRIP13, TTK, WRN]
GO:0044770	cell cycle phase transition	GO_BiologicalProcess-EBI-UniProt-GOA_27.02.2019_00h00	1.9341e-11	3.50846e-08	7.67956e-20	1.22873e-18	[3, 4]	Group19	10.4666	83	[ANLN, ANXA1, APP, ATM, AURKB, BCAT1, BCL2, BLM, BRIP1, BUB1, BUB1B, CCNA2, CCNB1, CCNY, CDC20, CDC25A, CDC27, CDC45, CDCA5, CDK1, CENPE, CENPF, CEP290, CEP57, CHAF1A, CHEK1, CIT, CLSPN, CRIP2, CTDSPL, DBF4, DLC1, DLGAP5, DTL, EPS8, FBXO5, FOXM1, GTSE1, HAUS4, HECW2, IQGAP3, KIF14, KMT2E, MAD2L1, MCM2, MCM3, MCM5, MCM6, MCM7, MELK, NBN, NDC80, NEK10, NEK2, ORC6, PCSK1, PKD2, PLK1, PLK4, POLE, PRK…
GO:0051304	chromosome separation	GO_BiologicalProcess-EBI-UniProt-GOA_27.02.2019_00h00	1.2015e-11	2.18192e-08	7.67956e-20	1.22873e-18	[3, 4]	Group19	22.5	27	[ATM, AURKB, BLM, BUB1, BUB1B, CCNB1, CDC20, CDC27, CENPE, CENPF, CRIP2, DLGAP5, FBXO5, HECW2, MAD2L1, NCAPD3, NCAPH, NDC80, PLK1, RIOK2, TACC3, TOP2A, TOP2B, TPR, TRIP13, TTK, WRN]
GO:0051726	regulation of cell cycle	GO_BiologicalProcess-EBI-UniProt-GOA_27.02.2019_00h00	1.6733e-12	3.04875e-09	7.67956e-20	1.22873e-18	[3, 4]	Group19	8.7619	138	[ACKR3, ACTB, AFAP1L2, ANLN, ANXA1, APP, ASPM, ATM, AURKB, BCHE, BCL2, BIRC5, BLM, BRCA2, BRD8, BRIP1, BUB1, BUB1B, CBX5, CCNA2, CCNB1, CCNF, CCNG2, CCNY, CCPG1, CDC20, CDC25A, CDC27, CDC45, CDCA5, CDK1, CDK19, CDKL5, CENPE, CENPF, CEP290, CEP295, CEP57, CEP85, CHAF1A, CHEK1, CIT, CLSPN, CRIP2, CTDSPL, DLC1, DLG1, DLGAP5, DTL, ECT2, EDN1, FANCD2, FBXO5, FOXM1, GRK5, GTSE1, HAUS4, HECW2, INCENP, I…
GO:0051983	regulation of chromosome segregation	GO_BiologicalProcess-EBI-UniProt-GOA_27.02.2019_00h00	2.00818e-13	3.67698e-10	7.67956e-20	1.22873e-18	[3, 4]	Group19	22.963	31	[ATM, AURKB, BUB1, BUB1B, CCNB1, CDC20, CDC27, CDCA5, CENPE, CENPF, CRIP2, DLGAP5, ECT2, FBXO5, HECW2, KIF2C, KNSTRN, MAD2L1, MKI67, NDC80, NEK2, PLK1, RACGAP1, RIOK2, SIRT2, SLF1, SPAG5, TACC3, TPR, TRIP13, TTK]
GO:0098813	nuclear chromosome segregation	GO_BiologicalProcess-EBI-UniProt-GOA_27.02.2019_00h00	1.25082e-19	2.3065e-16	7.67956e-20	1.22873e-18	[3, 4]	Group19	18.1548	61	[AGO4, ATM, AURKB, BLM, BRCA2, BRIP1, BUB1, BUB1B, CCNB1, CDC20, CDC27, CDCA5, CDCA8, CENPC, CENPE, CENPF, CRIP2, DLGAP5, DSN1, ECT2, FANCD2, FBXO5, HECW2, INCENP, KIF14, KIF18A, KIF18B, KIF22, KIF23, KIF2C, KIF4A, KIFC1, KNL1, KNSTRN, MAD2L1, NCAPD3, NCAPG, NCAPH, NDC80, NEK2, NUF2, NUSAP1, PDS5A, PLK1, PRC1, RACGAP1, RIOK2, SIRT2, SLF1, SMC2, SMC4, SPAG5, STAG3, TACC3, TOP2A, TOP2B, TPR, TRIP13…
GO:1903047	mitotic cell cycle process	GO_BiologicalProcess-EBI-UniProt-GOA_27.02.2019_00h00	1.48418e-27	2.75166e-24	7.67956e-20	1.22873e-18	[3, 4]	Group19	12.6899	142	[ANLN, ANXA1, APP, ATM, AURKB, BCAT1, BCL2, BIRC5, BLM, BRCA2, BRIP1, BUB1, BUB1B, CCNA2, CCNB1, CCNF, CCNG2, CCNY, CDC20, CDC25A, CDC27, CDC45, CDCA5, CDCA8, CDK1, CENPC, CENPE, CENPF, CEP290, CEP55, CEP57, CEP85, CHAF1A, CHEK1, CIT, CKAP2, CLSPN, CRIP2, CTDSPL, DBF4, DLC1, DLG1, DLGAP5, DSN1, DTL, ECT2, EDN1, EPS8, FANCD2, FBXO5, FOXM1, GINS1, GTSE1, HAUS4, HECW2, INCENP, INSR, INTS3, IQGAP3, K…
GO:0008608	attachment of spindle microtubules to kinetochore	GO_BiologicalProcess-EBI-UniProt-GOA_27.02.2019_00h00	4.58273e-09	8.23058e-06	7.67956e-20	1.22873e-18	[3, 4, 5]	Group19	33.3333	14	[AURKB, CCNB1, CENPC, CENPE, ECT2, KIF2C, KNL1, KNSTRN, NDC80, NEK2, NUF2, RACGAP1, SIRT2, SPAG5]
GO:0010564	regulation of cell cycle process	GO_BiologicalProcess-EBI-UniProt-GOA_27.02.2019_00h00	1.06254e-12	1.93913e-09	7.67956e-20	1.22873e-18	[3, 4, 5]	Group19	9.89534	104	[ACKR3, ANLN, ANXA1, APP, ATM, AURKB, BCL2, BLM, BRCA2, BUB1, BUB1B, CBX5, CCNA2, CCNB1, CCNF, CCNG2, CDC20, CDC25A, CDC27, CDC45, CDCA5, CDK1, CENPE, CENPF, CEP290, CEP295, CEP57, CEP85, CHAF1A, CHEK1, CIT, CLSPN, CRIP2, CTDSPL, DLC1, DLGAP5, DTL, ECT2, EDN1, FANCD2, FBXO5, FOXM1, GTSE1, HAUS4, HECW2, INCENP, INSR, KIF11, KIF14, KIF20A, KIF20B, KIF23, KMT2E, KNSTRN, MAD2L1, MBD4, MKI67, NBN, NDC…
GO:0045787	positive regulation of cell cycle	GO_BiologicalProcess-EBI-UniProt-GOA_27.02.2019_00h00	2.965e-08	5.28363e-05	7.67956e-20	1.22873e-18	[3, 4, 5]	Group19	10.4972	57	[ACKR3, ANXA1, APP, ATM, AURKB, BRCA2, BRD8, CCNA2, CCNB1, CCNF, CCNG2, CCNY, CCPG1, CDC25A, CDC45, CDCA5, CDK1, CEP295, CHAF1A, CHEK1, CIT, CRIP2, DLGAP5, DTL, ECT2, EDN1, FANCD2, FBXO5, GTSE1, INSR, KIF14, KIF20B, KIF23, KMT2E, LRP6, MAD2L1, MBD4, NDC80, NUDT16, NUSAP1, PBK, PCSK1, PDGFRB, PEBP1, PHIP, PKD2, PLK4, RACGAP1, SIRT2, SLF1, SOX4, SPAG5, TFDP2, THOC1, TPR, UBE2C, UHRF2]
GO:0048285	organelle fission	GO_BiologicalProcess-EBI-UniProt-GOA_27.02.2019_00h00	2.44772e-23	4.52828e-20	7.67956e-20	1.22873e-18	[4]	Group19	15.3199	91	[AGO4, ANLN, ASPM, ATM, AURKB, BIRC5, BLM, BRCA2, BRIP1, BUB1, BUB1B, CCNA2, CCNB1, CCNF, CCNG2, CDC20, CDC27, CDCA5, CDCA8, CENPC, CENPE, CENPF, CEP85, CHEK1, CRIP2, CTDSPL, DLGAP5, DSN1, EDN1, EPS8, FANCA, FANCD2, FBXO5, HECW2, INCENP, INF2, INSR, KDR, KIF11, KIF14, KIF18A, KIF18B, KIF20B, KIF22, KIF23, KIF2C, KIF4A, KIFC1, KLHDC3, KNSTRN, MAD2L1, MKI67, MSH3, MYBL2, NCAPD3, NCAPG, NCAPH, NDC80…
GO:0051276	chromosome organization	GO_BiologicalProcess-EBI-UniProt-GOA_27.02.2019_00h00	6.25224e-11	1.13166e-07	7.67956e-20	1.22873e-18	[4]	Group19	8.54701	130	[ACTB, AGO4, ANP32E, ANXA1, ARID2, ARRB1, ASPM, ATAD2, ATM, ATRNL1, AURKB, BAZ2B, BLM, BRCA2, BRD8, BRIP1, BUB1, BUB1B, CCNA2, CCNB1, CCNY, CDC20, CDC27, CDC45, CDCA5, CDCA8, CDK1, CENPC, CENPE, CENPF, CENPK, CENPU, CHAF1A, CHEK1, CRIP2, CTDSPL, DCHS1, DLGAP5, DPF3, DSN1, EPC2, EXO1, FANCD2, FBXO5, GINS1, HDAC1, HECW2, HIST1H1B, HIST1H1D, HIST1H2AJ, HIST1H2BI, HIST1H3B, HIST1H3C, HIST1H3G, HJURP,…
GO:0000075	cell cycle checkpoint	GO_BiologicalProcess-EBI-UniProt-GOA_27.02.2019_00h00	1.59284e-08	2.8464e-05	7.67956e-20	1.22873e-18	[2, 4, 5, 6]	Group19	12.9568	39	[ATM, AURKB, BLM, BRIP1, BUB1, BUB1B, CCNB1, CDC20, CDC45, CDK1, CENPF, CHAF1A, CHEK1, CLSPN, DLG1, DTL, GTSE1, INTS3, INTS7, MAD2L1, MSH2, NBN, NDC80, PCSK1, PLK1, SFRP1, SOX4, TAOK3, TFDP2, THOC1, TICRR, TOP2A, TOP2B, TPR, TRIP13, TTK, WDR76, WRN, ZWINT]
GO:0007051	spindle organization	GO_BiologicalProcess-EBI-UniProt-GOA_27.02.2019_00h00	4.16042e-10	7.50956e-07	7.67956e-20	1.22873e-18	[3, 4, 6]	Group19	16.1905	34	[ASPM, AURKB, BIRC5, CCDC69, CCNB1, CDC20, CENPE, CRIP2, DLG1, FBXO5, HAUS4, KIF11, KIF23, KIF4A, KIFC1, KNSTRN, MYBL2, NDC80, NEK2, NUF2, PLK1, PRC1, RACGAP1, SPAG5, SPC25, STIL, STMN1, TACC3, TPR, TPX2, TTK, TUBB, TUBGCP3, WDR62]
GO:0000819	sister chromatid segregation	GO_BiologicalProcess-EBI-UniProt-GOA_27.02.2019_00h00	5.31221e-20	9.80103e-17	7.67956e-20	1.22873e-18	[4, 5]	Group19	21.2245	52	[ATM, AURKB, BUB1, BUB1B, CCNB1, CDC20, CDC27, CDCA5, CDCA8, CENPC, CENPE, CENPF, CRIP2, DLGAP5, DSN1, FBXO5, HECW2, INCENP, KIF14, KIF18A, KIF18B, KIF22, KIF23, KIF2C, KIF4A, KIFC1, KNSTRN, MAD2L1, NCAPD3, NCAPG, NCAPH, NDC80, NEK2, NUF2, NUSAP1, PDS5A, PLK1, PRC1, RACGAP1, RIOK2, SLF1, SMC2, SMC4, SPAG5, STAG3, TACC3, TOP2A, TOP2B, TPR, TRIP13, TTK, ZWINT]
GO:0007346	regulation of mitotic cell cycle	GO_BiologicalProcess-EBI-UniProt-GOA_27.02.2019_00h00	5.12798e-13	9.36881e-10	7.67956e-20	1.22873e-18	[4, 5]	Group19	10.5682	93	[AFAP1L2, ANLN, ANXA1, APP, ATM, AURKB, BCHE, BCL2, BIRC5, BLM, BRCA2, BRD8, BUB1, BUB1B, CCNA2, CCNB1, CCNF, CCNG2, CDC20, CDC25A, CDC27, CDC45, CDCA5, CDK1, CENPE, CENPF, CEP290, CEP57, CEP85, CHAF1A, CHEK1, CLSPN, CRIP2, CTDSPL, DLC1, DLG1, DLGAP5, DTL, EDN1, FANCD2, FBXO5, GTSE1, HAUS4, HECW2, INCENP, INSR, INTS3, KIF11, KIF14, KIF20B, KMT2E, MAD2L1, MKI67, MSH2, NBN, NDC80, NEK2, NUSAP1, PBK…
GO:0033043	regulation of organelle organization	GO_BiologicalProcess-EBI-UniProt-GOA_27.02.2019_00h00	2.70903e-13	4.95212e-10	7.67956e-20	1.22873e-18	[4, 5]	Group19	8.82532	145	[ADD3, AKAP13, ANLN, ANXA1, ARHGAP18, ARHGDIB, ARRB1, ASPM, ATAD2, ATM, ATRNL1, AURKB, BCL2, BMF, BNIP3L, BUB1, BUB1B, CALCOCO2, CCNA2, CCNB1, CCNF, CCNG2, CDC20, CDC27, CDC45, CDCA5, CDKL5, CENPE, CENPF, CEP295, CEP85, CHEK1, CIT, CKAP2, CLIP3, CRIP2, DLC1, DLG1, DLGAP5, DUSP26, DYNC2LI1, ECT2, EDN1, EEF1A2, EHD2, EPS8, EVL, FBXO5, FMNL3, FN1, GOLPH3, GRIK2, HCLS1, HECW2, HGF, HIST1H1B, HIST1H1D…
GO:0044772	mitotic cell cycle phase transition	GO_BiologicalProcess-EBI-UniProt-GOA_27.02.2019_00h00	3.24098e-12	5.89858e-09	7.67956e-20	1.22873e-18	[4, 5]	Group19	10.9459	81	[ANLN, ANXA1, APP, ATM, AURKB, BCAT1, BCL2, BLM, BRIP1, BUB1, BUB1B, CCNA2, CCNB1, CCNY, CDC20, CDC25A, CDC27, CDC45, CDCA5, CDK1, CENPE, CENPF, CEP290, CEP57, CHAF1A, CHEK1, CIT, CLSPN, CRIP2, CTDSPL, DBF4, DLC1, DLGAP5, DTL, EPS8, FBXO5, FOXM1, GTSE1, HAUS4, HECW2, IQGAP3, KIF14, KMT2E, MAD2L1, MCM2, MCM3, MCM5, MCM6, MCM7, MELK, NBN, NDC80, NEK2, ORC6, PCSK1, PKD2, PLK1, PLK4, POLE, PRKAR2B, P…
GO:0090068	positive regulation of cell cycle process	GO_BiologicalProcess-EBI-UniProt-GOA_27.02.2019_00h00	3.79902e-08	6.76605e-05	7.67956e-20	1.22873e-18	[3, 4, 5, 6]	Group19	11.5	46	[ACKR3, ANXA1, APP, ATM, AURKB, CCNB1, CDC25A, CDC45, CDCA5, CDK1, CEP295, CHAF1A, CIT, CRIP2, DLGAP5, DTL, ECT2, EDN1, FBXO5, GTSE1, INSR, KIF14, KIF20B, KIF23, KMT2E, MAD2L1, MBD4, NDC80, NUDT16, NUSAP1, PBK, PCSK1, PDGFRB, PEBP1, PHIP, PKD2, PLK4, RACGAP1, SIRT2, SLF1, SOX4, SPAG5, TFDP2, TPR, UBE2C, UHRF2]
GO:0140013	meiotic nuclear division	GO_BiologicalProcess-EBI-UniProt-GOA_27.02.2019_00h00	7.77044e-08	0.00013777	7.67956e-20	1.22873e-18	[3, 4, 5, 6]	Group19	14.0271	31	[AGO4, ASPM, ATM, BLM, BRCA2, BRIP1, BUB1, BUB1B, CDC20, CENPC, CRIP2, CTDSPL, FANCA, FANCD2, FBXO5, KIF18A, KLHDC3, MSH3, NCAPH, NUF2, PDE3A, PLK1, SIRT2, SMC2, SMC4, STAG3, TOP2A, TOP2B, TRIP13, TTK, WRN]
GO:0000280	nuclear division	GO_BiologicalProcess-EBI-UniProt-GOA_27.02.2019_00h00	1.07616e-23	1.99197e-20	7.67956e-20	1.22873e-18	[5]	Group19	16.0221	87	[AGO4, ANLN, ASPM, ATM, AURKB, BIRC5, BLM, BRCA2, BRIP1, BUB1, BUB1B, CCNA2, CCNB1, CCNF, CCNG2, CDC20, CDC27, CDCA5, CDCA8, CENPC, CENPE, CENPF, CEP85, CHEK1, CRIP2, CTDSPL, DLGAP5, DSN1, EDN1, EPS8, FANCA, FANCD2, FBXO5, HECW2, INCENP, INSR, KIF11, KIF14, KIF18A, KIF18B, KIF20B, KIF22, KIF23, KIF2C, KIF4A, KIFC1, KLHDC3, KNSTRN, MAD2L1, MKI67, MSH3, MYBL2, NCAPD3, NCAPG, NCAPH, NDC80, NEK2, NUF…
GO:0007093	mitotic cell cycle checkpoint	GO_BiologicalProcess-EBI-UniProt-GOA_27.02.2019_00h00	3.83674e-08	6.82941e-05	7.67956e-20	1.22873e-18	[3, 4, 5, 6, 7]	Group19	14.1593	32	[ATM, AURKB, BLM, BUB1, BUB1B, CCNB1, CDC20, CDK1, CENPF, CHAF1A, CHEK1, CLSPN, DLG1, GTSE1, INTS3, MAD2L1, MSH2, NBN, NDC80, PCSK1, PLK1, SOX4, TAOK3, TFDP2, TICRR, TOP2A, TOP2B, TPR, TRIP13, TTK, WRN, ZWINT]
GO:0010639	negative regulation of organelle organization	GO_BiologicalProcess-EBI-UniProt-GOA_27.02.2019_00h00	8.30931e-07	0.00145745	7.67956e-20	1.22873e-18	[4, 5, 6]	Group19	9.82987	52	[ADD3, ASPM, ATAD2, ATM, ATRNL1, AURKB, BUB1, BUB1B, CCNB1, CCNF, CDC20, CENPF, CHEK1, CKAP2, CLIP3, CRIP2, DLC1, DUSP26, EPS8, FBXO5, FMNL3, HGF, HIST1H1B, HIST1H1D, LMOD1, LMOD2, LMOD3, MAD2L1, MCM2, MCM7, NBN, NCAPG, NDC80, NEK2, NUPR1, PLK1, PRKN, SHANK3, STMN1, STON1, SYT4, TMOD2, TMSB4X, TOP2A, TPR, TRIP13, TTBK2, TTK, TUBB, TWF1, VAT1, XRN1]
GO:0045132	meiotic chromosome segregation	GO_BiologicalProcess-EBI-UniProt-GOA_27.02.2019_00h00	1.18034e-06	0.00206205	7.67956e-20	1.22873e-18	[3, 4, 5, 6, 7]	Group19	16.5289	20	[AGO4, BLM, BRCA2, BRIP1, BUB1, BUB1B, CENPC, CRIP2, FANCD2, NCAPH, NUF2, PLK1, SMC2, SMC4, STAG3, TOP2A, TOP2B, TRIP13, TTK, WRN]
GO:0045931	positive regulation of mitotic cell cycle	GO_BiologicalProcess-EBI-UniProt-GOA_27.02.2019_00h00	1.37425e-06	0.00239807	7.67956e-20	1.22873e-18	[4, 5, 6]	Group19	13.0841	28	[ANXA1, APP, BRCA2, BRD8, CCNB1, CDC25A, CDC45, CDCA5, CDK1, CRIP2, DLGAP5, DTL, EDN1, FANCD2, FBXO5, INSR, KIF20B, KMT2E, MAD2L1, NDC80, NUSAP1, PBK, PDGFRB, PEBP1, PHIP, SLF1, TPR, UBE2C]
GO:0071103	DNA conformation change	GO_BiologicalProcess-EBI-UniProt-GOA_27.02.2019_00h00	2.26816e-07	0.000400558	7.67956e-20	1.22873e-18	[5]	Group19	11.3208	42	[ANXA1, BLM, BRIP1, CCNB1, CDC45, CDCA5, CDK1, CENPC, CENPK, CENPU, CHAF1A, CTDSPL, GINS1, HIST1H1B, HIST1H1D, HIST1H2BI, HIST1H3B, HIST1H3C, HIST1H3G, HJURP, HMGB1, KNL1, MCM2, MCM6, MCM7, MIS18BP1, MYL4, NBN, NCAPD3, NCAPG, NCAPG2, NCAPH, NUSAP1, PXDNL, S100A4, SHPRH, SMC2, SMC4, TOP2A, TOP2B, TPR, WRN]
GO:0140014	mitotic nuclear division	GO_BiologicalProcess-EBI-UniProt-GOA_27.02.2019_00h00	1.01196e-24	1.87517e-21	7.67956e-20	1.22873e-18	[4, 5, 6]	Group19	19.3548	72	[ANLN, ATM, AURKB, BIRC5, BUB1, BUB1B, CCNA2, CCNB1, CCNF, CCNG2, CDC20, CDC27, CDCA5, CDCA8, CENPC, CENPE, CENPF, CEP85, CHEK1, CRIP2, DLGAP5, DSN1, EDN1, EPS8, FBXO5, HECW2, INCENP, INSR, KIF11, KIF14, KIF18A, KIF18B, KIF20B, KIF22, KIF23, KIF2C, KIF4A, KIFC1, KNSTRN, MAD2L1, MKI67, MYBL2, NCAPD3, NCAPG, NCAPH, NDC80, NEK2, NUF2, NUSAP1, PBK, PDGFRB, PDS5A, PDZD2, PEBP1, PHIP, PLK1, PLP1, PRC1,…
GO:1901987	regulation of cell cycle phase transition	GO_BiologicalProcess-EBI-UniProt-GOA_27.02.2019_00h00	1.19576e-08	2.13802e-05	7.67956e-20	1.22873e-18	[4, 5, 6]	Group19	10.2606	63	[ANLN, ANXA1, APP, ATM, AURKB, BCL2, BLM, BUB1, BUB1B, CCNB1, CDC20, CDC25A, CDC27, CDC45, CDCA5, CDK1, CENPE, CENPF, CEP290, CEP57, CHAF1A, CHEK1, CLSPN, CRIP2, CTDSPL, DLC1, DLGAP5, DTL, FBXO5, GTSE1, HAUS4, HECW2, KIF14, KMT2E, MAD2L1, NBN, NDC80, NEK10, NEK2, PCSK1, PKD2, PLK1, PLK4, PRKAR2B, PSMA7, RALBP1, RIOK2, S100A4, SCARA3, SIRT2, SOX4, SUSD2, TAOK3, TFDP2, TICRR, TPR, TPX2, TRIP13, TTK…
GO:1902850	microtubule cytoskeleton organization involved in mitosis	GO_BiologicalProcess-EBI-UniProt-GOA_27.02.2019_00h00	1.05545e-08	1.88926e-05	7.67956e-20	1.22873e-18	[4, 5, 6]	Group19	16.875	27	[AURKB, BIRC5, CCNB1, CDC20, CENPE, CRIP2, KIF11, KIF23, KIF4A, KIFC1, MYBL2, NDC80, NEK2, NUF2, NUSAP1, PLK1, PRC1, RACGAP1, SETD2, SPC25, STIL, STMN1, TACC3, TPR, TPX2, TTK, WDR62]
GO:0000070	mitotic sister chromatid segregation	GO_BiologicalProcess-EBI-UniProt-GOA_27.02.2019_00h00	5.75042e-22	1.06325e-18	7.67956e-20	1.22873e-18	[4, 5, 6, 7]	Group19	24.7475	49	[ATM, AURKB, BUB1, BUB1B, CCNB1, CDC20, CDC27, CDCA5, CDCA8, CENPC, CENPE, CENPF, CRIP2, DLGAP5, DSN1, FBXO5, HECW2, INCENP, KIF14, KIF18A, KIF18B, KIF22, KIF23, KIF2C, KIF4A, KIFC1, KNSTRN, MAD2L1, NCAPD3, NCAPG, NCAPH, NDC80, NEK2, NUF2, NUSAP1, PDS5A, PLK1, PRC1, RACGAP1, RIOK2, SLF1, SMC2, SMC4, SPAG5, TACC3, TPR, TRIP13, TTK, ZWINT]
GO:0007052	mitotic spindle organization	GO_BiologicalProcess-EBI-UniProt-GOA_27.02.2019_00h00	9.65657e-09	1.73046e-05	7.67956e-20	1.22873e-18	[4, 5, 6, 7]	Group19	18.6047	24	[AURKB, BIRC5, CCNB1, CDC20, CENPE, KIF11, KIF23, KIF4A, KIFC1, MYBL2, NDC80, NEK2, NUF2, PLK1, PRC1, RACGAP1, SPC25, STIL, STMN1, TACC3, TPR, TPX2, TTK, WDR62]
GO:0033045	regulation of sister chromatid segregation	GO_BiologicalProcess-EBI-UniProt-GOA_27.02.2019_00h00	2.68888e-09	4.83729e-06	7.67956e-20	1.22873e-18	[4, 5, 6, 7]	Group19	20.5357	23	[ATM, AURKB, BUB1, BUB1B, CCNB1, CDC20, CDC27, CDCA5, CENPE, CENPF, CRIP2, DLGAP5, FBXO5, HECW2, MAD2L1, NDC80, PLK1, RIOK2, SLF1, TACC3, TPR, TRIP13, TTK]
GO:0051783	regulation of nuclear division	GO_BiologicalProcess-EBI-UniProt-GOA_27.02.2019_00h00	1.31595e-12	2.39898e-09	7.67956e-20	1.22873e-18	[5, 6]	Group19	15.8451	45	[ANLN, ATM, AURKB, BUB1, BUB1B, CCNA2, CCNB1, CCNF, CCNG2, CDC20, CDC27, CDCA5, CENPE, CENPF, CEP85, CHEK1, CRIP2, DLGAP5, EDN1, FBXO5, HECW2, INSR, KIF11, KIF20B, MAD2L1, MKI67, NDC80, NEK2, NUSAP1, PBK, PDE3A, PDGFRB, PDZD2, PEBP1, PHIP, PLK1, PLP1, RIOK2, SIRT2, SLF1, TACC3, TPR, TRIP13, TTK, UBE2C]
GO:0033046	negative regulation of sister chromatid segregation	GO_BiologicalProcess-EBI-UniProt-GOA_27.02.2019_00h00	1.05919e-06	0.00185359	7.67956e-20	1.22873e-18	[4, 5, 6, 7, 8]	Group19	21.1268	15	[ATM, AURKB, BUB1, BUB1B, CCNB1, CDC20, CENPF, CRIP2, FBXO5, MAD2L1, NDC80, PLK1, TPR, TRIP13, TTK]
GO:0045839	negative regulation of mitotic nuclear division	GO_BiologicalProcess-EBI-UniProt-GOA_27.02.2019_00h00	3.12284e-06	0.00541813	7.67956e-20	1.22873e-18	[4, 5, 6, 7, 8]	Group19	19.4805	15	[ATM, AURKB, BUB1, BUB1B, CCNB1, CDC20, CENPF, CHEK1, FBXO5, MAD2L1, NDC80, PLK1, TPR, TRIP13, TTK]
GO:1901990	regulation of mitotic cell cycle phase transition	GO_BiologicalProcess-EBI-UniProt-GOA_27.02.2019_00h00	1.16794e-08	2.08944e-05	7.67956e-20	1.22873e-18	[5, 6, 7]	Group19	10.4895	60	[ANLN, ANXA1, APP, ATM, AURKB, BCL2, BLM, BUB1, BUB1B, CCNB1, CDC20, CDC25A, CDC27, CDC45, CDCA5, CDK1, CENPE, CENPF, CEP290, CEP57, CHAF1A, CLSPN, CRIP2, CTDSPL, DLC1, DLGAP5, DTL, FBXO5, GTSE1, HAUS4, HECW2, KIF14, KMT2E, MAD2L1, NBN, NDC80, NEK2, PCSK1, PKD2, PLK1, PLK4, PRKAR2B, PSMA7, RALBP1, RIOK2, S100A4, SCARA3, SIRT2, SOX4, TAOK3, TFDP2, TICRR, TPR, TPX2, TRIP13, TTK, TUBA1A, TUBB, UBE2C…
GO:0007091	metaphase/anaphase transition of mitotic cell cycle	GO_BiologicalProcess-EBI-UniProt-GOA_27.02.2019_00h00	2.09174e-11	3.79232e-08	7.67956e-20	1.22873e-18	[5, 6, 7, 8, 9, 10]	Group19	28.3784	21	[ATM, AURKB, BUB1, BUB1B, CCNB1, CDC20, CDC27, CENPE, CENPF, CRIP2, DLGAP5, FBXO5, HECW2, MAD2L1, NDC80, PLK1, RIOK2, TACC3, TPR, TRIP13, TTK]
GO:0030071	regulation of mitotic metaphase/anaphase transition	GO_BiologicalProcess-EBI-UniProt-GOA_27.02.2019_00h00	5.73939e-10	1.03481e-06	7.67956e-20	1.22873e-18	[6, 7, 8, 9, 10, 11]	Group19	26.7606	19	[ATM, AURKB, BUB1, BUB1B, CCNB1, CDC20, CENPE, CENPF, CRIP2, DLGAP5, FBXO5, HECW2, MAD2L1, NDC80, PLK1, RIOK2, TPR, TRIP13, TTK]
GO:0045841	negative regulation of mitotic metaphase/anaphase transition	GO_BiologicalProcess-EBI-UniProt-GOA_27.02.2019_00h00	9.7998e-08	0.000173358	7.67956e-20	1.22873e-18	[6, 7, 8, 9, 10, 11, 12]	Group19	26.9231	14	[ATM, AURKB, BUB1, BUB1B, CCNB1, CDC20, CENPF, FBXO5, MAD2L1, NDC80, PLK1, TPR, TRIP13, TTK]
