# Supplementary material for: Doxorubicin induces cardiotoxicity in a pluripotent stem cell model of aggressive B cell lymphoma cancer patients
Source: Basic Res Cardiol. 2022 Mar 8;117(1):13. doi: 10.1007/s00395-022-00918-7 (PMC8904375; doi:10.1007/s00395-022-00918-7)
Supplement: Supplementary file 3 — Supplementary file3 (XLS 39 KB) [file 395_2022_918_MOESM3_ESM.xls]

## Sheet: ClueGO Results
GOID	GOTerm	Ontology Source	Term PValue	Term PValue Corrected with Bonferroni step down	Group PValue	Group PValue Corrected with Bonferroni step down	GOLevels	GOGroups	% Associated Genes	Nr. Genes	Associated Genes Found
GO:0032020	ISG15-protein conjugation	GO_BiologicalProcess-EBI-UniProt-GOA_27.02.2019_00h00	0.000140285	0.0366144	0.000140285	0.000420856	[6, 7]	Group0	42.8571	3	[HERC5, ISG15, UBE2L6]
GO:0043025	neuronal cell body	GO_CellularComponent-EBI-UniProt-GOA_27.02.2019_00h00	1.39707e-05	0.00393974	1.39707e-05	9.77949e-05	[3, 4, 5]	Group1	4.02985	27	[ACSL4, ANXA3, CACNA1B, CALM2, CANX, CASP3, CRYAB, DGKI, GABRA2, KIF5C, LIG3, MDH2, MME, PARD3, PENK, PPP1CA, RNF13, RPSA, SERPINI1, SH3GL2, SLC38A2, SOD1, SYNPO, TAC1, UBB, UBXN1, VPS52]
GO:0072583	clathrin-dependent endocytosis	GO_BiologicalProcess-EBI-UniProt-GOA_27.02.2019_00h00	0.000167753	0.0434482	0.000167753	0.000335507	[7]	Group2	11.7647	6	[AAK1, CALM2, CANX, CLTB, SH3GL2, VPS52]
GO:1900745	positive regulation of p38MAPK cascade	GO_BiologicalProcess-EBI-UniProt-GOA_27.02.2019_00h00	7.80792e-05	0.0210033	7.80792e-05	0.000312317	[7, 8, 9, 10, 11, 12, 13]	Group3	17.8571	5	[HAND2, IL1B, KARS, PRMT1, XDH]
GO:0019866	organelle inner membrane	GO_CellularComponent-EBI-UniProt-GOA_27.02.2019_00h00	2.75219e-05	0.00762357	2.75219e-05	0.00013761	[3, 4, 5, 6, 7, 8]	Group4	4.04531	25	[ATP5ME, CHCHD10, COX5B, CYP21A2, GHITM, HIGD1A, IFI27, IFI6, LGALS3, MRPL14, MRPL32, MRPL33, MRPL37, MRPL48, NDUFB9, ODC1, P2RX1, RNF13, SDHA, SDSL, SIRT5, SLC25A5, TIMM17A, TIMM8B, TIMMDC1]
GO:0005743	mitochondrial inner membrane	GO_CellularComponent-EBI-UniProt-GOA_27.02.2019_00h00	8.88449e-05	0.0238104	2.75219e-05	0.00013761	[4, 5, 6, 7, 8, 9, 10, 11]	Group4	4.0293	22	[ATP5ME, CHCHD10, COX5B, CYP21A2, GHITM, HIGD1A, IFI6, LGALS3, MRPL14, MRPL32, MRPL33, MRPL37, MRPL48, NDUFB9, ODC1, SDHA, SDSL, SIRT5, SLC25A5, TIMM17A, TIMM8B, TIMMDC1]
GO:0044449	contractile fiber part	GO_CellularComponent-EBI-UniProt-GOA_27.02.2019_00h00	0.000104356	0.0277588	0.000185828	0.000185828	[2, 3, 4, 5, 6, 7, 8]	Group5	5.06757	15	[ABRA, ADRA1A, ANKRD1, ATP2B2, CALM2, CRYAB, CSRP3, MINDY3, MYO18B, PDLIM1, RFTN1, SYNPO, SYNPO2L, TRIM63, VCL]
GO:0030017	sarcomere	GO_CellularComponent-EBI-UniProt-GOA_27.02.2019_00h00	0.000188382	0.0484143	0.000185828	0.000185828	[3, 4, 5, 6, 7, 8, 9]	Group5	5.03597	14	[ABRA, ADRA1A, ANKRD1, ATP2B2, CALM2, CRYAB, CSRP3, MINDY3, MYO18B, PDLIM1, RFTN1, SYNPO, SYNPO2L, TRIM63]
GO:0030016	myofibril	GO_CellularComponent-EBI-UniProt-GOA_27.02.2019_00h00	0.000140014	0.0366836	0.000185828	0.000185828	[5, 6, 7, 8]	Group5	4.93421	15	[ABRA, ADRA1A, ANKRD1, ATP2B2, CALM2, CRYAB, CSRP3, MINDY3, MYO18B, PDLIM1, RFTN1, SYNPO, SYNPO2L, TRIM63, VCL]
GO:0031674	I band	GO_CellularComponent-EBI-UniProt-GOA_27.02.2019_00h00	0.000135331	0.035592	0.000185828	0.000185828	[3, 4, 5, 6, 7, 8, 9, 10]	Group5	5.85366	12	[ADRA1A, ANKRD1, ATP2B2, CRYAB, CSRP3, MINDY3, MYO18B, PDLIM1, RFTN1, SYNPO, SYNPO2L, TRIM63]
GO:0098793	presynapse	GO_CellularComponent-EBI-UniProt-GOA_27.02.2019_00h00	1.73229e-05	0.00486774	1.73229e-05	0.000103938	[2, 3, 4]	Group6	4.15973	25	[AAK1, ADRA1A, ARHGAP44, ATP2B2, CACNA1B, CALM2, CANX, CDH10, CLTB, DGKI, FLOT2, GABRA2, MDH2, MME, NRXN3, NTRK2, P2RX1, PCLO, PENK, PPP1CA, PRSS12, SH3GL2, SLC30A3, SYNGR2, TMEM163]
GO:0048786	presynaptic active zone	GO_CellularComponent-EBI-UniProt-GOA_27.02.2019_00h00	0.000106078	0.0281108	1.73229e-05	0.000103938	[2, 3, 4, 5]	Group6	8.88889	8	[ARHGAP44, ATP2B2, CANX, CDH10, DGKI, FLOT2, P2RX1, PCLO]
GO:0048787	presynaptic active zone membrane	GO_CellularComponent-EBI-UniProt-GOA_27.02.2019_00h00	2.22435e-05	0.0061837	1.73229e-05	0.000103938	[3, 4, 5, 6, 7, 8, 9]	Group6	16.6667	6	[ATP2B2, CANX, CDH10, DGKI, FLOT2, P2RX1]
GO:0098945	intrinsic component of presynaptic active zone membrane	GO_CellularComponent-EBI-UniProt-GOA_27.02.2019_00h00	3.56094e-05	0.00979259	1.73229e-05	0.000103938	[4, 5, 6, 7, 8, 9, 10]	Group6	20.8333	5	[ATP2B2, CANX, CDH10, FLOT2, P2RX1]
KEGG:04144	Endocytosis	KEGG_27.02.2019	0.000183671	0.047387	1.14925e-05	9.19403e-05	[-1]	Group7	5.32787	13	[ACAP1, CLTB, HLA-A, HLA-B, HLA-C, KIF5C, PARD3, RAB11FIP2, SH3GL2, SNX2, UBB, VPS25, VTA1]
GO:0002428	antigen processing and presentation of peptide antigen via MHC class Ib	GO_BiologicalProcess-EBI-UniProt-GOA_27.02.2019_00h00	4.29838e-05	0.0117776	1.14925e-05	9.19403e-05	[4]	Group7	30.7692	4	[B2M, HLA-A, HLA-B, HLA-C]
GO:0002480	antigen processing and presentation of exogenous peptide antigen via MHC class I, TAP-independent	GO_BiologicalProcess-EBI-UniProt-GOA_27.02.2019_00h00	1.31201e-05	0.00371297	1.14925e-05	9.19403e-05	[6]	Group7	40	4	[B2M, HLA-A, HLA-B, HLA-C]
GO:0042612	MHC class I protein complex	GO_CellularComponent-EBI-UniProt-GOA_27.02.2019_00h00	2.03542e-05	0.00569919	1.14925e-05	9.19403e-05	[5, 6, 7, 8]	Group7	36.3636	4	[B2M, HLA-A, HLA-B, HLA-C]
GO:0031901	early endosome membrane	GO_CellularComponent-EBI-UniProt-GOA_27.02.2019_00h00	6.90663e-05	0.018717	1.14925e-05	9.19403e-05	[4, 5, 6, 7, 8, 9, 10, 11]	Group7	6.28272	12	[B2M, GGA3, HLA-A, HLA-B, HLA-C, MARCH3, MYLIP, NTRK2, SNX19, SNX2, TMEM163, VPS52]
GO:0055038	recycling endosome membrane	GO_CellularComponent-EBI-UniProt-GOA_27.02.2019_00h00	0.000144061	0.037456	1.14925e-05	9.19403e-05	[4, 5, 6, 7, 8, 9, 10, 11]	Group7	8.51064	8	[ACAP1, B2M, GGA3, HLA-A, HLA-B, HLA-C, RAB11FIP2, VTA1]
KEGG:03010	Ribosome	KEGG_27.02.2019	2.94802e-08	8.72613e-06	7.35309e-11	6.61778e-10	[-1]	Group8	9.80392	15	[FAU, MRPL14, MRPL32, MRPL33, RPL23A, RPL38, RPL41, RPL7, RPS15, RPS2, RPS20, RPS24, RPS26, RPS27, RPSA]
GO:0016032	viral process	GO_BiologicalProcess-EBI-UniProt-GOA_27.02.2019_00h00	1.12548e-08	3.35393e-06	7.35309e-11	6.61778e-10	[4]	Group8	4.12371	44	[APOBEC3G, B2M, CADM1, DYRK3, EIF3D, EIF6, FAU, GSN, GTF2A2, HLA-A, HLA-B, HLA-C, IFI27, ISG15, KARS, MTUS1, MX1, PHYH, POLR2B, PSMB7, RANBP2, RPL23A, RPL38, RPL41, RPL7, RPS15, RPS2, RPS20, RPS24, RPS26, RPS27, RPSA, SLC25A5, SLC52A1, STAT1, TAF10, TMEM173, TRIM21, UBB, UBC, UBXN1, VTA1, XRCC6, ZC3HAV1]
GO:0071826	ribonucleoprotein complex subunit organization	GO_BiologicalProcess-EBI-UniProt-GOA_27.02.2019_00h00	0.000103475	0.0276277	7.35309e-11	6.61778e-10	[4]	Group8	4.84848	16	[CELF2, DYRK3, EFNA1, EIF3D, EIF6, PRMT5, RBM22, RPF2, RPL23A, RPL38, RPS15, RPS27, RPSA, SLU7, SNRPC, WDR77]
GO:0005840	ribosome	GO_CellularComponent-EBI-UniProt-GOA_27.02.2019_00h00	1.02073e-06	0.000296011	7.35309e-11	6.61778e-10	[3, 4, 5, 6, 7]	Group8	6.31579	18	[CANX, FAU, MRPL14, MRPL32, MRPL33, MRPL37, MRPL48, RPL23A, RPL38, RPL41, RPL7, RPS15, RPS2, RPS20, RPS24, RPS26, RPS27, RPSA]
GO:0019080	viral gene expression	GO_BiologicalProcess-EBI-UniProt-GOA_27.02.2019_00h00	2.81589e-08	8.36321e-06	7.35309e-11	6.61778e-10	[5]	Group8	7.6	19	[EIF3D, EIF6, FAU, MTUS1, PHYH, POLR2B, RANBP2, RPL23A, RPL38, RPL41, RPL7, RPS15, RPS2, RPS20, RPS24, RPS26, RPS27, RPSA, TRIM21]
GO:0090150	establishment of protein localization to membrane	GO_BiologicalProcess-EBI-UniProt-GOA_27.02.2019_00h00	3.26921e-05	0.00902301	7.35309e-11	6.61778e-10	[4, 5, 6]	Group8	4.57666	20	[APOBEC2, ARHGAP44, CALM2, CEMIP, FAU, GGA3, PARD3, RFTN1, RPL23A, RPL38, RPL41, RPL7, RPS15, RPS2, RPS20, RPS24, RPS26, RPS27, RPSA, TOMM22]
GO:0019083	viral transcription	GO_BiologicalProcess-EBI-UniProt-GOA_27.02.2019_00h00	1.89046e-07	5.57685e-05	7.35309e-11	6.61778e-10	[5, 6]	Group8	7.48899	17	[FAU, MTUS1, PHYH, POLR2B, RANBP2, RPL23A, RPL38, RPL41, RPL7, RPS15, RPS2, RPS20, RPS24, RPS26, RPS27, RPSA, TRIM21]
GO:0044391	ribosomal subunit	GO_CellularComponent-EBI-UniProt-GOA_27.02.2019_00h00	2.01321e-07	5.91884e-05	7.35309e-11	6.61778e-10	[3, 4, 5, 6, 7, 8]	Group8	7.45614	17	[FAU, MRPL14, MRPL32, MRPL33, MRPL37, MRPL48, RPL23A, RPL38, RPL41, RPL7, RPS15, RPS2, RPS20, RPS24, RPS26, RPS27, RPSA]
GO:0006412	translation	GO_BiologicalProcess-EBI-UniProt-GOA_27.02.2019_00h00	1.74189e-06	0.000503407	7.35309e-11	6.61778e-10	[5, 6, 7]	Group8	4.07125	32	[BTG2, CPEB4, EFNA1, EIF1AY, EIF3D, EIF6, FARSA, FAU, KARS, MRPL14, MRPL32, MRPL33, MRPL37, MRPL48, PPP1CA, RARS, RNF13, RPL23A, RPL38, RPL41, RPL7, RPS15, RPS2, RPS20, RPS24, RPS26, RPS27, RPS6KB2, RPSA, SARS, TARSL2, VTA1]
GO:0006413	translational initiation	GO_BiologicalProcess-EBI-UniProt-GOA_27.02.2019_00h00	3.70625e-07	0.000108593	7.35309e-11	6.61778e-10	[3, 6, 7, 8]	Group8	7.14286	17	[EIF1AY, EIF3D, EIF6, FAU, PPP1CA, RPL23A, RPL38, RPL41, RPL7, RPS15, RPS2, RPS20, RPS24, RPS26, RPS27, RPS6KB2, RPSA]
GO:0042255	ribosome assembly	GO_BiologicalProcess-EBI-UniProt-GOA_27.02.2019_00h00	4.99142e-05	0.0136266	7.35309e-11	6.61778e-10	[5, 6, 7]	Group8	9.87654	8	[EFNA1, EIF6, RPF2, RPL23A, RPL38, RPS15, RPS27, RPSA]
GO:0044445	cytosolic part	GO_CellularComponent-EBI-UniProt-GOA_27.02.2019_00h00	6.71243e-05	0.0182578	7.35309e-11	6.61778e-10	[4, 5, 6, 7, 8]	Group8	5.03145	16	[CCT4, DIPK2A, FAU, KXD1, RPL23A, RPL38, RPL41, RPL7, RPS15, RPS2, RPS20, RPS24, RPS26, RPS27, RPSA, SH3GL2]
GO:0070972	protein localization to endoplasmic reticulum	GO_BiologicalProcess-EBI-UniProt-GOA_27.02.2019_00h00	2.20717e-05	0.00615801	7.35309e-11	6.61778e-10	[6]	Group8	7.05882	12	[FAU, RPL23A, RPL38, RPL41, RPL7, RPS15, RPS2, RPS20, RPS24, RPS26, RPS27, RPSA]
GO:0072599	establishment of protein localization to endoplasmic reticulum	GO_BiologicalProcess-EBI-UniProt-GOA_27.02.2019_00h00	3.78135e-06	0.00108525	7.35309e-11	6.61778e-10	[5, 6, 7]	Group8	8.39161	12	[FAU, RPL23A, RPL38, RPL41, RPL7, RPS15, RPS2, RPS20, RPS24, RPS26, RPS27, RPSA]
GO:0015935	small ribosomal subunit	GO_CellularComponent-EBI-UniProt-GOA_27.02.2019_00h00	0.000133653	0.0352843	7.35309e-11	6.61778e-10	[4, 5, 6, 7, 8, 9]	Group8	8.60215	8	[FAU, RPS15, RPS2, RPS20, RPS24, RPS26, RPS27, RPSA]
GO:0022626	cytosolic ribosome	GO_CellularComponent-EBI-UniProt-GOA_27.02.2019_00h00	4.69292e-06	0.00134218	7.35309e-11	6.61778e-10	[4, 5, 6, 7, 8, 9]	Group8	8.21918	12	[FAU, RPL23A, RPL38, RPL41, RPL7, RPS15, RPS2, RPS20, RPS24, RPS26, RPS27, RPSA]
GO:0006612	protein targeting to membrane	GO_BiologicalProcess-EBI-UniProt-GOA_27.02.2019_00h00	6.98632e-05	0.0188631	7.35309e-11	6.61778e-10	[5, 6, 7, 8, 9, 10]	Group8	5.5336	14	[CEMIP, FAU, PARD3, RPL23A, RPL38, RPL41, RPL7, RPS15, RPS2, RPS20, RPS24, RPS26, RPS27, RPSA]
GO:0022627	cytosolic small ribosomal subunit	GO_CellularComponent-EBI-UniProt-GOA_27.02.2019_00h00	8.7149e-06	0.00248375	7.35309e-11	6.61778e-10	[5, 6, 7, 8, 9, 10]	Group8	12.5	8	[FAU, RPS15, RPS2, RPS20, RPS24, RPS26, RPS27, RPSA]
GO:0045047	protein targeting to ER	GO_BiologicalProcess-EBI-UniProt-GOA_27.02.2019_00h00	2.80998e-06	0.000809275	7.35309e-11	6.61778e-10	[6, 7, 8, 9, 10]	Group8	8.63309	12	[FAU, RPL23A, RPL38, RPL41, RPL7, RPS15, RPS2, RPS20, RPS24, RPS26, RPS27, RPSA]
GO:0000184	nuclear-transcribed mRNA catabolic process, nonsense-mediated decay	GO_BiologicalProcess-EBI-UniProt-GOA_27.02.2019_00h00	9.90285e-06	0.00281241	7.35309e-11	6.61778e-10	[7, 8, 9, 10]	Group8	7.64331	12	[FAU, RPL23A, RPL38, RPL41, RPL7, RPS15, RPS2, RPS20, RPS24, RPS26, RPS27, RPSA]
GO:0006613	cotranslational protein targeting to membrane	GO_BiologicalProcess-EBI-UniProt-GOA_27.02.2019_00h00	9.0889e-07	0.000264487	7.35309e-11	6.61778e-10	[6, 7, 8, 9, 10, 11]	Group8	9.6	12	[FAU, RPL23A, RPL38, RPL41, RPL7, RPS15, RPS2, RPS20, RPS24, RPS26, RPS27, RPSA]
GO:0006614	SRP-dependent cotranslational protein targeting to membrane	GO_BiologicalProcess-EBI-UniProt-GOA_27.02.2019_00h00	6.3969e-07	0.00018679	7.35309e-11	6.61778e-10	[7, 8, 9, 10, 11, 12]	Group8	9.91736	12	[FAU, RPL23A, RPL38, RPL41, RPL7, RPS15, RPS2, RPS20, RPS24, RPS26, RPS27, RPSA]
