# Supplementary material for: Doxorubicin induces cardiotoxicity in a pluripotent stem cell model of aggressive B cell lymphoma cancer patients
Source: Basic Res Cardiol. 2022 Mar 8;117(1):13. doi: 10.1007/s00395-022-00918-7 (PMC8904375; doi:10.1007/s00395-022-00918-7)
Supplement: Supplementary file 4 — Supplementary file4 (XLS 35 KB) [file 395_2022_918_MOESM4_ESM.xls]

## Sheet: ClueGO Results
GOID	GOTerm	Ontology Source	Term PValue	Term PValue Corrected with Bonferroni step down	Group PValue	Group PValue Corrected with Bonferroni step down	GOLevels	GOGroups	% Associated Genes	Nr. Genes	Associated Genes Found
GO:0006611	protein export from nucleus	GO_BiologicalProcess-EBI-UniProt-GOA_27.02.2019_00h00	4.04338e-07	0.000819593	4.04338e-07	2.02169e-06	[5, 6, 7, 8, 9]	Group0	15.9184	39	[ABCE1, ACVR1, AGFG1, ALYREF, BAG3, CHORDC1, CPSF2, CSE1L, DDX39A, DHX38, EIF4A3, HARS, HGS, NDC1, NUP58, NXF1, PCID2, POLDIP3, POLR2D, POM121, POM121C, POMZP3, PRKACA, RANGAP1, RAPGEF4, RBM15B, RIPK1, RNPS1, RRAGA, RRS1, SDAD1, SEH1L, SMG6, TGFB1, THOC6, UHMK1, UPF1, VAC14, XPO6]
GO:0051701	interaction with host	GO_BiologicalProcess-EBI-UniProt-GOA_27.02.2019_00h00	3.99285e-06	0.00808154	3.99285e-06	3.99285e-06	[3, 4]	Group1	14.4928	40	[ALYREF, AXL, BCL2L11, CCNK, CD46, CLDN9, DDX39A, DPP4, EIF2AK4, FUS, HSPA1A, HSPA1B, ITGB5, KPNA4, LAMP1, LDLR, MET, NPC1, PC, PITX2, PMPCA, PPHLN1, PPID, PTX3, RAB7A, RAB7B, RRAGA, SCRIB, SERPINB9, SLC10A1, SLC1A5, SLC22A5, SMAD3, SRC, TGFB1, THOC6, TYMS, VPS4B, WWP2, ZC3H12A]
GO:0042254	ribosome biogenesis	GO_BiologicalProcess-EBI-UniProt-GOA_27.02.2019_00h00	1.41003e-07	0.000286096	1.41003e-07	8.4602e-07	[4]	Group2	14.6628	50	[AATF, ABCE1, BMS1, BRIX1, BYSL, DDIT3, DDX21, DDX31, DDX3X, DDX49, DHX37, EIF2S1, EIF4A3, ESF1, FCF1, GNL2, GTPBP4, LTO1, MIEF1, MRM1, MRM2, NAT10, NIP7, NOC2L, NOL8, NOM1, NOP14, NOP2, NOP58, PDCD11, PES1, RHBDD1, RPS10, RRP15, RRP7A, RRP9, RRS1, SDAD1, SRFBP1, TENT4B, TEX10, URB1, URB2, USP36, UTP20, UTP25, UTP6, WDR3, WDR46, WDR74]
GO:0043170	macromolecule metabolic process	GO_BiologicalProcess-EBI-UniProt-GOA_27.02.2019_00h00	3.17305e-06	0.00642542	3.17305e-06	6.34609e-06	[3]	Group3	7.44222	760	[AATF, ABCA7, ABCB6, ABCE1, ABCF1, ABHD17C, ABL2, ACOT7, ACP2, ACTR2, ACTR3, ACVR1, ADAM23, ADAMTS3, ADAT1, ADCYAP1R1, ADORA2B, ADPRH, ADRA2C, ADRM1, AEBP2, AFF1, AGFG1, AHNAK, AJUBA, AKAP8, ALYREF, AMER1, ANAPC7, ANKRD13B, ANKRD33, AP2B1, AP2M1, APOBEC4, APOL1, APOL2, ARAP1, ARC, ARF1, ARFGEF3, ARID3B, ARIH2, ARNT2, ARNTL, ARPP19, ARRDC4, ARSB, ASAP1, ASXL2, ATF1, ATG16L1, ATG3, ATP6AP2, AUP1, A…
GO:0035967	cellular response to topologically incorrect protein	GO_BiologicalProcess-EBI-UniProt-GOA_27.02.2019_00h00	2.66352e-06	0.00539629	2.66352e-06	7.99056e-06	[4, 5]	Group4	15.814	34	[ACADVL, ARFGAP1, ARFGAP3, ATP6V0D1, BAG3, BCL2L11, DDIT3, DNAJB9, EIF2S1, ERN1, GFPT2, GOSR2, HSPA1A, HSPA1B, HYOU1, ICAM5, LMNA, MYDGF, NAP1L1, NFE2L2, PARP16, PDIA6, POMT2, PPP1R15B, RHBDD1, RNF121, RNF185, SEC31A, TOR1A, TPP1, TSPYL2, UGGT1, WDR1, YOD1]
GO:0034620	cellular response to unfolded protein	GO_BiologicalProcess-EBI-UniProt-GOA_27.02.2019_00h00	4.31915e-06	0.00873764	2.66352e-06	7.99056e-06	[5, 6]	Group4	16.3934	30	[ACADVL, ARFGAP1, ARFGAP3, ATP6V0D1, BAG3, BCL2L11, DDIT3, DNAJB9, EIF2S1, ERN1, GFPT2, GOSR2, HSPA1A, HSPA1B, HYOU1, ICAM5, LMNA, MYDGF, NAP1L1, NFE2L2, PARP16, PDIA6, PPP1R15B, RHBDD1, RNF121, SEC31A, TPP1, TSPYL2, WDR1, YOD1]
GO:0009593	detection of chemical stimulus	GO_BiologicalProcess-EBI-UniProt-GOA_27.02.2019_00h00	2.94398e-08	5.97922e-05	5.1808e-07	2.07232e-06	[3]	Group5	1.63339	9	[ASIC3, DEPDC7, OR2B2, OR2B6, OR2W6P, PMPCA, SS18, TAS1R1, TAS2R4]
GO:0050906	detection of stimulus involved in sensory perception	GO_BiologicalProcess-EBI-UniProt-GOA_27.02.2019_00h00	2.0838e-07	0.000422595	5.1808e-07	2.07232e-06	[3, 5]	Group5	1.93322	11	[ASIC3, BACE1, BEST1, CXCL12, DEPDC7, OR2B2, OR2B6, OR2W6P, PTPRR, TAS1R1, TAS2R4]
GO:0007606	sensory perception of chemical stimulus	GO_BiologicalProcess-EBI-UniProt-GOA_27.02.2019_00h00	6.69148e-08	0.000135837	5.1808e-07	2.07232e-06	[5]	Group5	1.78253	10	[ASIC3, DEPDC7, GNAL, NAV2, OBP2A, OR2B2, OR2B6, OR2W6P, TAS1R1, TAS2R4]
GO:0050907	detection of chemical stimulus involved in sensory perception	GO_BiologicalProcess-EBI-UniProt-GOA_27.02.2019_00h00	1.90126e-08	3.86527e-05	5.1808e-07	2.07232e-06	[4, 6]	Group5	1.39442	7	[ASIC3, DEPDC7, OR2B2, OR2B6, OR2W6P, TAS1R1, TAS2R4]
GO:0007608	sensory perception of smell	GO_BiologicalProcess-EBI-UniProt-GOA_27.02.2019_00h00	2.05267e-08	4.17102e-05	5.1808e-07	2.07232e-06	[6]	Group5	1.27119	6	[GNAL, NAV2, OBP2A, OR2B2, OR2B6, OR2W6P]
