# Supplementary material for: Doxorubicin induces cardiotoxicity in a pluripotent stem cell model of aggressive B cell lymphoma cancer patients
Source: Basic Res Cardiol. 2022 Mar 8;117(1):13. doi: 10.1007/s00395-022-00918-7 (PMC8904375; doi:10.1007/s00395-022-00918-7)
Supplement: Supplementary file 5 — Supplementary file5 (XLS 29 KB) [file 395_2022_918_MOESM5_ESM.xls]

## Sheet: ClueGO Results
GOID	GOTerm	Ontology Source	Term PValue	Term PValue Corrected with Bonferroni step down	Group PValue	Group PValue Corrected with Bonferroni step down	GOLevels	GOGroups	% Associated Genes	Nr. Genes	Associated Genes Found
GO:0002250	adaptive immune response	GO_BiologicalProcess-EBI-UniProt-GOA_27.02.2019_00h00	1.07475e-05	0.0229137	1.07475e-05	3.22425e-05	[3]	Group0	4.71939	37	[AGER, APLF, ARHGEF28, BMX, BTN3A1, BTN3A2, BTN3A3, C6, CAMK2G, CAPG, CSRP1, CXCL10, DENND1B, GINS2, GPR183, HLX, IL31RA, IRF4, KDELR1, KLHL7, MEF2C, NDFIP1, NSD2, ORC3, PARP3, PRDX2, RIPK2, RSAD2, SERPING1, SLC25A4, TESC, TNFSF13B, TP53BP1, TRAF6, TRPM4, UNG, ZBTB1]
GO:0006614	SRP-dependent cotranslational protein targeting to membrane	GO_BiologicalProcess-EBI-UniProt-GOA_27.02.2019_00h00	5.10034e-06	0.010879	5.10034e-06	2.04014e-05	[7, 8, 9, 10, 11, 12]	Group1	22.314	27	[DIRAS1, RPL13, RPL21, RPL22, RPL3, RPL30, RPL31, RPL34, RPL37A, RPL39, RPL4, RPL5, RPL9P8, RPLP0, RPS13, RPS14, RPS15A, RPS16, RPS18, RPS23, RPS25, RPS27A, RPS5, RPS6, RPS9, SRP14, TRAM1L1]
GO:0007186	G protein-coupled receptor signaling pathway	GO_BiologicalProcess-EBI-UniProt-GOA_27.02.2019_00h00	2.33768e-10	4.99329e-07	2.33768e-10	1.40261e-09	[3, 4, 5]	Group2	4.78288	76	[ADCY4, ADGRB3, ADGRG1, ADGRL3, AKR1C3, ANO1, APOE, ARHGEF1, ARHGEF12, ARHGEF2, ARHGEF9, CCHCR1, CLEC11A, CXCL10, CXCR2, CXCR6, DNM1, EDNRA, EDNRB, ESR1, F2R, F2RL3, FGD4, FZD2, GABBR1, GIPC1, GLRB, GNG7, GPR17, GPR183, GPR22, GPRC5B, GPSM3, GYPC, HHEX, HOMER3, INVS, IRF6, LANCL1, LGALS1, LHCGR, LPAR1, LPAR4, NET1, NPPB, NPR1, NTS, OPN3, OR2A1, OR2A42, PDCL, PDE4B, PDE6B, PIK3R6, PLEKHG5, PPOX, P…
GO:0009083	branched-chain amino acid catabolic process	GO_BiologicalProcess-EBI-UniProt-GOA_27.02.2019_00h00	1.24886e-05	0.0266132	1.24886e-05	2.49772e-05	[5, 6, 7, 8]	Group3	39.2857	11	[ACAT1, ALDH6A1, AUH, BCAT2, BCKDHB, DLD, HADH, HIBADH, HMGCLL1, IVD, MCCC1]
GO:0006887	exocytosis	GO_BiologicalProcess-EBI-UniProt-GOA_27.02.2019_00h00	1.9176e-05	0.0408448	1.71213e-05	1.71213e-05	[3, 5, 6]	Group4	5.53663	65	[ALAD, ALDH9A1, APBA1, ARPC5, ASAH1, CACNB2, CAPS, CAT, CD47, CDK5, CHN1, CLASP1, CLEC11A, COPS5, CPNE3, CXCR2, CYBA, DAPK2, DNM1L, EGF, EGFL7, ENPP4, FDPS, GIPC1, GMCL1, GMFG, GPI, GUSB, HPR, IGBP1, IGF1, ITM2C, KIT, LEFTY2, LHCGR, MAGED2, NLGN1, ORC3, PCYT1B, PDK1, PFN2, PLD1, PRRT2, RAB11B, RAB5B, RIMS3, RIMS4, RNF34, SCAMP5, SCRN1, SCRN2, SELL, SERPINB6, SERPING1, SGCG, SLC44A2, SPARC, SRP14,…
GO:0002446	neutrophil mediated immunity	GO_BiologicalProcess-EBI-UniProt-GOA_27.02.2019_00h00	2.31029e-05	0.049186	1.71213e-05	1.71213e-05	[5]	Group4	4.55882	31	[ACE, ALAD, ALDH9A1, ARPC5, ASAH1, CAT, CD47, CPNE3, CXCR2, CYBA, EGFL7, ENPP4, GMCL1, GMFG, GPI, GUSB, HPR, ITM2C, LHCGR, PCYT1B, PLD1, RAB5B, RNF34, SELL, SERPINB6, SLC44A2, SRP14, SVIP, SYNGR1, TNFAIP6, TRIT1]
GO:0050877	nervous system process	GO_BiologicalProcess-EBI-UniProt-GOA_27.02.2019_00h00	4.21095e-07	0.000898616	4.21095e-07	2.10547e-06	[3]	Group5	5.67458	98	[AAAS, ACE2, ADGRB3, AGER, ANO1, APOE, B3GNT2, B4GAT1, BBS2, BBS5, BPNT1, C12orf57, CACNB2, CAMK2G, CBLN1, CCN3, CDK5, CDKN1B, CFAP69, CHN1, CHRNA1, CLDN5, COL18A1, DCPS, DDHD2, DDX11, DNAJC19, DRAM2, EDNRB, EHMT2, EPM2A, F2R, FOXP2, FZD2, GABBR1, GATM, GLRB, GPI, HMCN1, HOMER3, HOXD8, KAT2A, KCNMB3, KCNMB4, KIT, LHCGR, LUM, MAPK3, MEF2C, MPP1, MUSK, MYH7B, NDN, NIPSNAP1, NLGN1, NLGN4X, NOS3, OR2…
GO:0007600	sensory perception	GO_BiologicalProcess-EBI-UniProt-GOA_27.02.2019_00h00	3.67108e-09	7.83775e-06	4.21095e-07	2.10547e-06	[4]	Group5	4.34397	49	[ANO1, B3GNT2, B4GAT1, BBS2, BBS5, BPNT1, CACNB2, CCN3, CDK5, CDKN1B, CFAP69, COL18A1, DNAJC19, DRAM2, EDNRB, F2R, FZD2, GLRB, HMCN1, HOXD8, KIT, LUM, MAPK3, MYH7B, NDN, NIPSNAP1, OR2A1, OR2A42, PAK3, PDCL, PDE6B, PDE6D, POU6F2, RABGGTB, RETREG1, RGS9, RIPK2, RIPOR2, SCN11A, SCN1A, SERPINB6, SFRP5, SOBP, SPX, TAS2R14, TBL1X, TNFRSF11B, USH1C, VIP]
