# Supplementary material for: Doxorubicin induces cardiotoxicity in a pluripotent stem cell model of aggressive B cell lymphoma cancer patients
Source: Basic Res Cardiol. 2022 Mar 8;117(1):13. doi: 10.1007/s00395-022-00918-7 (PMC8904375; doi:10.1007/s00395-022-00918-7)
Supplement: Supplementary file 6 — Supplementary file6 (XLS 19 KB) [file 395_2022_918_MOESM6_ESM.xls]

## Sheet: Tabelle1
Supplemental Table 11
USED cardiac differentiations/cells/EHM per experiment used for statistical analysis
Figure 1B: Fibrotic area in human myocardium of NF and ACT
Non-failing	hearts (N)	Tissue slices (n)	n (for SEM) of controls
myocardium	5	4	20 tissue slices of 5 controls
Failing	hearts (N)	Tissue slices (n)	n (for SEM) of patients
myocardium	5	4	20 tissue slices of 5 patients
Figure 1C/D: Gene and protein expression in human myocardium of NF and ACT
hearts (N)	hearts (N)	Western/qPCR	n (for SEM) of controls
5	5	4 -5 samples	4-5 of 5 controls
hearts (N)	hearts (N)	Western/qPCR	n (for SEM) of patients
5	5	3 -5 samples	3-5 of 5 patients
Figure 1G: cardiac Fibroblasts gene expression
cFB (N)			n (for SEM) of cFB
3	3 treated and non-treated		3 cFB passages
sFB (N)			n (for SEM) of sFB
3	3 treated and non-treated		3 sFB passages
Figure 2A/B: DOX pharmacokinetik in iPSC-cardiomyocytes
control	differentiations (N)	HPLC (n)	n (for SEM) of controls
1-control	1	1	3 of 2 controls
2-control	2	2
ACT-patient	differentiations (N)	HPLC (n)	n (for SEM) of patients
ACT1	2	2	5 of 2 patients
ACT2	n.a.	n.a.
ACT3	3	3
Figure 2C: Viability of iPSC-cardiomyocytes after DOX
control	differentiations (N)	Casy (n)	n (for SEM) of controls
2-control	1	4	4 of 1 control
ACT-patient	differentiations (N)	Casy (n)	n (for SEM) of patients
ACT1	1	8	12 of 2 patients
ACT2	1	4
ACT3	n.a.	n.a.
Figure 2D/E/SF6A: Sarcomeric disarray in iPSC-cardiomyocytes
control	differentiations (N)	Analyzed cells (n)	n (for SEM) of controls
1-control	2	30	60 of 2 controls
2-control	2	30
ACT-patient	differentiations (N)	Analyzed cells (n)	n (for SEM) of patients
ACT1	2	30	90 of 3 patients
ACT2	2	30
ACT3	2	30
Figure 2F/G/SF6C: apoptosis and necrosis for each DOX conc. in iPSC-cardiomyocytes
control	differentiations (N)	Flow Cytometry (n)	n (for SEM) of controls
1-control	4	4	10 of 2 controls
2-control	6	6
ACT-patient	differentiations (N)	Flow cytometry (n)	n (for SEM) of patients
ACT1	4	4	10 of 3 patients
ACT2	3	3
ACT3	3	3
Figure 3A-D: Mitochondrial disarray in iPSC-cardiomyocytes: network/branch length
control	differentiations (N)	cells (n)	n (for SEM) of controls
1-control	n.a.		18 of 1 controls
2-control	2	18
ACT-patient	differentiations (N)	cells (n)	n (for SEM) of patients
ACT1	n.a.		14-26 of 2 patients
ACT2	2	8 - 14 cells
ACT3	1	6 - 12 cells
Figure 3E: TEM Mitochondria and sarcomer in iPSC-cardiomyocytes
control	differentiations (N)	images (n)	n (for SEM) of controls
1-control	1	10	40 of 2 controls
2-control	2	20
ACT-patient	differentiations (N)	images (n)	n (for SEM) of patients
ACT1	2	20	40 of 2 patients
ACT2	2	20
Figure 4A/SF6D: H2O2-Amplex Red in iPSC-cardiomyocytes
control	differentiations (N)	Luminescence (n)	n (for SEM) of controls
1-control	5	5	12 of 2 controls
2-control	7	7
ACT-patient	differentiations (N)	Luminescence (n)
ACT1	4	4	20 of 3 patients
ACT2	8	8
ACT3	8	8
Figure 4B: H2O2-Amplex Red in cardiac fibroblasts and skin fibroblasts
cFB control	passages (N)	luminescence	n (for SEM) of controls
1-control	3	3	3 of 1 control
cFB patient	passages (N)	Luminescence	n (for SEM) of patients
ACT4	3	3	3 of 1 ACT patient
Skin FB patient	passages (N)	Luminescence	n (for SEM) of patients
ACT3	3	3	3 of 1 ACT patient
Figure 5; SFigure 7: EHM
control	differentiations (N)	EHMs (n)	n (for SEM) of controls
1-control	2	6	12 EHMs of 2 controls
2-control	2	6
ACT patient	differentiations (N)	EHMs (n)	n (for SEM) of patients
ACT1	2	5	17 EHMs of 3 patients
ACT2	2	6
ACT3	2	6
Figure 6A/B: Ca2+ transients/decay
control	differentiations (N)	cells (n)	n (for SEM) of controls
1-control	4	80	180 cells of 2 controls
2-control	5	100
ACT patient	differentiations (N)	cells (n)	n (for SEM) of patients
ACT1	4	80 cells	180 of 3 patients
ACT2	2	40
ACT3	3	60
Figure 6C/H: Western
control	differentiations (N)	Blots (n)	n (for SEM) of controls
1-control	2	2	4 of 2 controls
2-control	2	2
ACT patient	differentiations (N)	Blots(n)	n (for SEM) of patients
ACT1	2	2 Blots	6 of 3 patients
ACT2	2	2
ACT3	2	2
Figure 7A/B: Ca2+ Sparks
control	differentiations (N)	Cells (n)	n (for SEM) of controls
1-control	4	80	120 of 2 controls
2-control	2	40
ACT patient	differentiations (N)	Cells (n)	n (for SEM) of patients
ACT1	3	59 cells	79 of 2 patients
ACT2
ACT3	1	20
Figure 7C/D: DADs
control	differentiations (N)	Cells (n)	n (for SEM) of controls
1-control	1	2	8 of 2 controls
2-control	1	6
ACT patient	differentiations (N)	Cells (n)	n (for SEM) of patients
ACT1	n.a.	n.a.	13 of 2 patients
ACT2	2	9
ACT3	1	4
Figure 7E/F: DADs with CaMKII inhibitor AIP/DOX
ACT patient	differentiations (N)	Cells (n)	n (for SEM) of patients
ACT1	n.a.	n.a.	6-13 of 1 patients
ACT2	2	6 - 13 cells
ACT3	n.a.	n.a.
Figure 7G/H/I: APD
control	differentiations (N)	Cells (n)	n (for SEM) of controls
1-control	1	2 - 7 cells	9-16 of 2 controls
2-control	1	7 - 9 cells
ACT patient	differentiations (N)	Cells (n)	n (for SEM) of patients
ACT1	n.a.	n.a.	14 - 17 of 2 patients
ACT2	2	9 - 13 cells
ACT3	1	4 - 5 cells
Figure 8: Transcriptomics-NGS
control	differentiations (N)	EHM (n)	n (for SEM) of controls
1-control	2	3	5-6 EHM of 2 controls
2-control	2	2 - 3 EHM
ACT patient	differentiations (N)	EHM (n)	n (for SEM) of patients
ACT1	2	2 - 3 EHM	6 - 7 EHM of 3 patients
ACT2	2	2
ACT3	2	2
SFigure 5B: EdU
control	differentiations (N)	pictures (n)	n (for SEM) of controls
1-control	n.a.	n.a.	10 of 1 controls
2-control	1	10 pictures
ACT patient	differentiations (N)	pictures (n)	n (for SEM) of patients
ACT1	1	10 pictures	30 of 3 patients
ACT2	1	10
ACT3	1	10
SFigure 6B: Viability of iPSC-cardiomyocytes after DOX
control	differentiations (N)	Casy (n)	n (for SEM) of controls
2-control	1	4	4 of 1 control
ACT-patient	differentiations (N)	Casy (n)	n (for SEM) of patients
ACT1	1	8	12 of 2 patients
ACT2	1	4
ACT3	n.a.	n.a.
SFigure 8: Western basal
control	differentiations (N)	Blots (n)	n (for SEM) of controls
1-control	2	2	4 of 2 controls
2-control	2	2
ACT patient	differentiations (N)	Blots(n)	n (for SEM) of patients
ACT1	2	2 Blots	6 of 3 patients
ACT2	2	2
ACT3	2	2
