# Supplementary material for: Doxorubicin induces cardiotoxicity in a pluripotent stem cell model of aggressive B cell lymphoma cancer patients
Source: Basic Res Cardiol. 2022 Mar 8;117(1):13. doi: 10.1007/s00395-022-00918-7 (PMC8904375; doi:10.1007/s00395-022-00918-7)
Supplement: Supplementary file 8 — Supplementary file8 (XLSX 159 KB) [file 395_2022_918_MOESM8_ESM.xlsx]

## Sheet: ClueGO Results
GOID	GOTerm	Ontology Source	Term PValue	Term PValue Corrected with Bonferroni step down	Group PValue	Group PValue Corrected with Bonferroni step down	GOLevels	GOGroups	% Associated Genes	Nr. Genes	Associated Genes Found
GO:0004930	G protein-coupled receptor activity	GO_BiologicalProcess-EBI-UniProt-GOA_27.02.2019_00h00	3.98339e-06	0.00738919	3.98339e-06	1.59336e-05	[4, 5, 6]	Group00	2.09644	20	[ADGRG6, ADGRV1, ADRB2, AGTRAP, CCR7, DCXR, FGF23, FZD5, GPR87, LPAR5, MC1R, NPY1R, OGFRL1, OR52B6, OR52H1, S1PR3, TFRC, TMEFF2, TXNRD1, XPR1]
GO:0007608	sensory perception of smell	GO_BiologicalProcess-EBI-UniProt-GOA_27.02.2019_00h00	4.92718e-06	0.00912021	4.92718e-06	1.47815e-05	[6]	Group01	1.05932	5	[ADCY8, BBS4, GNAS, OR52B6, OR52H1]
GO:0035970	peptidyl-threonine dephosphorylation	GO_BiologicalProcess-EBI-UniProt-GOA_27.02.2019_00h00	1.79996e-06	0.00337672	1.79996e-06	1.43997e-05	[7, 8]	Group02	42.1053	8	[DUSP1, DUSP10, DUSP4, DUSP5, PDP1, PPM1A, PPM1D, PPM1G]
GO:0050906	detection of stimulus involved in sensory perception	GO_BiologicalProcess-EBI-UniProt-GOA_27.02.2019_00h00	1.30018e-06	0.00244954	1.30018e-06	1.17016e-05	[3, 5]	Group03	1.23023	7	[ADGRV1, ITGA2, OR52B6, OR52H1, TRPV1, TXNRD1, WHRN]
GO:0051128	regulation of cellular component organization	GO_BiologicalProcess-EBI-UniProt-GOA_27.02.2019_00h00	3.68836e-06	0.00684929	3.68836e-06	1.84418e-05	[3, 4]	Group04	6.76617	204	[ACVR1B, ADRB2, AGRN, AKIRIN1, ANGPTL2, ANK1, ANKRD13A, ANXA2, APLP2, ARPC5L, ATF5, ATG7, BAK1, BAMBI, BAX, BBC3, BBS4, BCL2L1, BCL6, BDNF, BDNF-AS, BECN1, BIK, BUB3, C21orf91, C3, C6orf89, CABYR, CAPRIN2, CCNA1, CCR7, CCT5, CCT6A, CCT7, CDC37, CDC42EP3, CDC42EP4, CDH8, CDK2AP2, CDKN1A, CEP250, CFL1, CHMP1B, CHMP4B, CLDN1, CLEC16A, CLU, CRABP2, CSF3, CSPG4, CXCL16, DCP1B, DCUN1D3, DDB1, DDB2, DDR…
GO:0051701	interaction with host	GO_BiologicalProcess-EBI-UniProt-GOA_27.02.2019_00h00	1.86162e-06	0.00348868	1.86162e-06	1.30314e-05	[3, 4]	Group05	12.3188	34	[ATG7, BCL2L1, CD55, CDKN1A, CHMP4B, CLDN1, CPSF4, CTSB, CXADR, DCXR, DDB1, DDX39B, EPHA2, EXOC7, F11R, ICAM1, ITGA2, ITGB6, KPNA1, KRT17, NAF1, PPIA, PVR, SCARB2, SELPLG, SERPINB3, SERPINB4, TFRC, TNIP1, TRIM35, TRIM5, TRIM8, TUSC2, XPR1]
GO:0070914	UV-damage excision repair	GO_BiologicalProcess-EBI-UniProt-GOA_27.02.2019_00h00	1.97371e-06	0.00369084	1.97371e-06	1.18423e-05	[6, 7, 8]	Group06	50	7	[APOBEC3C, DDB1, DDB2, HIST3H2A, MC1R, SIRT1, XPC]
GO:0009991	response to extracellular stimulus	GO_BiologicalProcess-EBI-UniProt-GOA_27.02.2019_00h00	5.32686e-06	0.00984937	3.05424e-07	3.05424e-06	[3]	Group07	8.95317	65	[ACSL1, ADM, ADRB2, ALDH1A2, APLP2, AQP3, ASS1, ATF3, ATG7, BBS4, BECN1, C3, CDKN1A, CLEC16A, CSTA, CYP26B1, DOCK3, DSC3, EIF4G1, ENC1, FADS1, FAS, FBXO22, FGF23, FOSL1, GCLC, GCN1, GDF15, GSTP1, HFE, HSPA8, ICAM1, ITGA2, KLF10, MAP1LC3B, MDM2, NAMPT, NOCT, NQO1, P2RX4, PCNA, PIM1, PKM, POR, PPM1D, PRKAB1, PSMD8, RPS19, SESN1, SESN2, SH3GLB1, SIRT1, SLC25A25, SLC2A1, SORD, SSH1, STC2, TAP1, TDO2,…
GO:0071496	cellular response to external stimulus	GO_BiologicalProcess-EBI-UniProt-GOA_27.02.2019_00h00	8.41098e-09	1.61911e-05	3.05424e-07	3.05424e-06	[3]	Group07	11.7778	53	[ADRB2, AQP3, ATF3, ATG7, ATP1A1, BAK1, BECN1, C3, CDKN1A, CLEC16A, DOCK3, DSC3, EIF4G1, FADS1, FAS, FBXO22, FGF23, FOSL1, GADD45A, GCLC, GCN1, GSTP1, HFE, HSPA8, ICAM1, ITGA2, KLF10, MAP1LC3B, MDM2, MTPN, NAMPT, P2RX4, PDE2A, PIM1, PPM1D, PRKAB1, PSMD8, SESN1, SESN2, SH3GLB1, SIRT1, SLC2A1, SLC9A1, SSH1, TAP1, TNFRSF10A, TNFRSF10B, TNFRSF1A, TP53INP1, TRIM24, TRPV1, UCN2, UPP1]
GO:0031668	cellular response to extracellular stimulus	GO_BiologicalProcess-EBI-UniProt-GOA_27.02.2019_00h00	6.58122e-07	0.00124846	3.05424e-07	3.05424e-06	[3, 4]	Group07	11.4441	42	[ADRB2, AQP3, ATF3, ATG7, BECN1, C3, CDKN1A, CLEC16A, DOCK3, DSC3, EIF4G1, FADS1, FAS, FBXO22, FGF23, FOSL1, GCN1, GSTP1, HFE, HSPA8, ICAM1, KLF10, MAP1LC3B, MDM2, NAMPT, P2RX4, PIM1, PPM1D, PRKAB1, PSMD8, SESN1, SESN2, SH3GLB1, SIRT1, SLC2A1, SSH1, TAP1, TP53INP1, TRIM24, TRPV1, UCN2, UPP1]
GO:0031669	cellular response to nutrient levels	GO_BiologicalProcess-EBI-UniProt-GOA_27.02.2019_00h00	2.63895e-07	0.000503511	3.05424e-07	3.05424e-06	[4, 5]	Group07	12.1212	40	[ADRB2, AQP3, ATF3, ATG7, BECN1, C3, CDKN1A, CLEC16A, DOCK3, DSC3, EIF4G1, FADS1, FAS, FBXO22, FGF23, GCN1, HFE, HSPA8, ICAM1, KLF10, MAP1LC3B, MDM2, NAMPT, P2RX4, PIM1, PPM1D, PRKAB1, PSMD8, SESN1, SESN2, SH3GLB1, SIRT1, SLC2A1, SSH1, TAP1, TP53INP1, TRIM24, TRPV1, UCN2, UPP1]
GO:0048583	regulation of response to stimulus	GO_BiologicalProcess-EBI-UniProt-GOA_27.02.2019_00h00	3.43638e-09	6.64251e-06	1.32666e-10	1.72466e-09	[2, 3]	Group08	6.55738	344	[ACPP, ACVR1B, ADCY8, ADGRV1, ADM, ADRB2, AKAP12, AKIRIN1, ALK, ANGPTL2, ANXA2, APLP1, APLP2, ARAP2, ARHGAP10, ARL4C, ATF3, ATG7, AVPI1, BAG1, BAK1, BAMBI, BAX, BBC3, BBS4, BCL2L1, BCL6, BDNF, BDNF-AS, BECN1, BIK, C2CD3, C3, C6orf89, CALCB, CAPN1, CAPRIN2, CASP10, CCDC3, CCM2, CCR7, CD274, CD55, CD59, CDC37, CDKN1A, CEP250, CHRD, CITED2, CLEC16A, CLU, CRABP2, CSF1, CSF3, CSNK1G1, CSNK2B, CSPG4, C…
GO:0033554	cellular response to stress	GO_BiologicalProcess-EBI-UniProt-GOA_27.02.2019_00h00	4.7054e-09	9.08142e-06	1.32666e-10	1.72466e-09	[3]	Group08	7.49902	191	[ACER2, ADCY8, ADM, ADRB2, AEN, ANGPTL2, APOBEC3C, APTX, AQP3, ASCC3, ASS1, ATF3, ATG7, BAG1, BAK1, BAX, BBC3, BCL2L1, BCL6, BECN1, BHLHE40, C3, CCM2, CCR7, CDC37, CDIP1, CDKN1A, CITED2, CLEC16A, CLU, CSPG4, CSTA, DDB1, DDB2, DDR1, DDX39B, DHRS2, DOT1L, DSC3, DUSP1, DUSP10, E2F7, EDA2R, EDEM1, EGLN3, EIF2B5, EIF4G1, ELOC, ELOVL6, ENPP2, EPB41L4B, EPHA2, EPHA4, ERCC6L2, ETAA1, ETV5, FADS1, FAS, FB…
GO:0048584	positive regulation of response to stimulus	GO_BiologicalProcess-EBI-UniProt-GOA_27.02.2019_00h00	5.17616e-06	0.0095759	1.32666e-10	1.72466e-09	[2, 3, 4]	Group08	6.71911	205	[ACPP, ACVR1B, ADCY8, ADGRV1, ADRB2, AKAP12, AKIRIN1, ALK, ANGPTL2, APLP2, ARL4C, ATF3, AVPI1, BAK1, BAMBI, BAX, BBC3, BCL2L1, BDNF, BDNF-AS, BECN1, BIK, C3, CAPRIN2, CASP10, CCM2, CCR7, CD274, CD55, CD59, CDKN1A, CITED2, CLEC16A, CLU, CSF1, CSF3, CSNK1G1, CSNK2B, CSPG4, CSTA, CTSB, CTSL, CYFIP2, DBI, DHRS3, DOCK3, DUOX2, DUSP5, DUSP6, EDA2R, EDEM1, EDN2, EGR2, EIF2B5, ELF3, EPHA4, F3, FAM49B, FA…
GO:0080134	regulation of response to stress	GO_BiologicalProcess-EBI-UniProt-GOA_27.02.2019_00h00	5.2451e-08	0.000100706	1.32666e-10	1.72466e-09	[3, 4]	Group08	7.74026	149	[ADCY8, ADRB2, ANGPTL2, ANXA2, APLP2, ARL4C, ATG7, BAG1, BAK1, BAX, BBC3, BCL2L1, BCL6, C3, CCM2, CCR7, CDC37, CDKN1A, CLU, CSTA, CTSB, CTSL, DDX39B, DNASE1, DOCK3, DUOX2, DUOXA2, DUSP1, DUSP10, EDA2R, EDEM1, EIF4G1, ENPP2, EPB41L4B, EPHA4, EPPK1, ERAP1, ETAA1, F3, FAS, FBXO44, FBXW7, FEM1B, FGF2, FKBP4, FLOT1, FZD5, GADD45A, GADD45B, GCH1, GPX1, GSTP1, H2AFY, HIF1A, HLA-E, HPX, HRAS, HSP90AB1, H…
GO:0006914	autophagy	GO_BiologicalProcess-EBI-UniProt-GOA_27.02.2019_00h00	2.74585e-06	0.00510729	7.26632e-06	1.45326e-05	[3, 4]	Group09	9.52381	58	[ACER2, ADRB2, ATG4A, ATG7, ATP6V0A1, ATP6V1B2, ATP6V1D, ATP6V1E1, BECN1, C3, CAPN1, CDC37, CHMP4B, CLEC16A, CLU, CSNK2B, CSPG4, EI24, EIF4G1, EXOC7, FBXO44, FBXW7, FZD5, GDF15, HIF1A, HSPA8, HSPB8, ILRUN, LAMP3, MAP1LC3B, MCL1, MTCL1, NAMPT, OPTN, PIP4K2C, PLK2, PLK3, POLDIP2, PRKAB1, PRKAB2, SESN1, SESN2, SH3GLB1, SIRT1, SMCR8, SPATA18, SPTLC1, SQSTM1, STAT3, TAB3, TIGAR, TP53INP1, TREM2, TRIM2…
GO:0009894	regulation of catabolic process	GO_BiologicalProcess-EBI-UniProt-GOA_27.02.2019_00h00	2.46587e-06	0.00459392	7.26632e-06	1.45326e-05	[3, 4]	Group09	8.08163	99	[ABHD5, ACER2, ADRB2, ANXA2, ATG7, ATP6V0A1, ATP6V1B2, ATP6V1D, ATP6V1E1, BAX, BBS7, BECN1, CAPN1, CDC37, CHMP4B, CLEC16A, CLU, CSPG4, DDB1, DFFA, EDEM1, EIF4G1, EPB41L4B, EPHA4, EXOC7, FBXO22, FBXO44, FBXW7, FZD5, GCLC, GDF15, GDNF, GPX1, GRIN2C, GTPBP1, HFE, HIF1A, HSP90AB1, HSPA8, HSPB8, LAMP3, LRPPRC, MCL1, MDM2, MTCL1, NAF1, NAMPT, NOCT, NR1D1, NRG1, NUP188, OPTN, PDCD6IP, PFKFB2, PFKFB4, PI…
GO:0031329	regulation of cellular catabolic process	GO_BiologicalProcess-EBI-UniProt-GOA_27.02.2019_00h00	8.01815e-08	0.000153467	7.26632e-06	1.45326e-05	[4, 5]	Group09	8.78004	95	[ABHD5, ACER2, ADRB2, ANXA2, ATG7, ATP6V0A1, ATP6V1B2, ATP6V1D, ATP6V1E1, BAX, BBS7, BECN1, CAPN1, CDC37, CHMP4B, CLEC16A, CLU, CSPG4, DFFA, EDEM1, EIF4G1, EPB41L4B, EPHA4, EXOC7, FBXO22, FBXO44, FBXW7, FZD5, GCLC, GDF15, GDNF, GPX1, GTPBP1, HFE, HIF1A, HSP90AB1, HSPA8, HSPB8, LAMP3, LRPPRC, MCL1, MDM2, MTCL1, NAF1, NAMPT, NOCT, NUP188, OPTN, PDCD6IP, PFKFB2, PFKFB4, PIP4K2C, PLK2, PLK3, POLDIP2,…
GO:0010506	regulation of autophagy	GO_BiologicalProcess-EBI-UniProt-GOA_27.02.2019_00h00	7.97012e-08	0.000152628	7.26632e-06	1.45326e-05	[4, 5, 6]	Group09	11.6915	47	[ACER2, ADRB2, ATG7, ATP6V0A1, ATP6V1B2, ATP6V1D, ATP6V1E1, BECN1, CAPN1, CDC37, CHMP4B, CLEC16A, CSPG4, EIF4G1, EXOC7, FBXO44, FBXW7, FZD5, GDF15, HIF1A, HSPB8, LAMP3, MCL1, MTCL1, NAMPT, OPTN, PIP4K2C, PLK2, PLK3, POLDIP2, PRKAB1, PRKAB2, SESN1, SESN2, SH3GLB1, SIRT1, SMCR8, SPTLC1, STAT3, TAB3, TIGAR, TP53INP1, TREM2, TRIM22, TRIM8, USP32, VPS13C]
GO:0010508	positive regulation of autophagy	GO_BiologicalProcess-EBI-UniProt-GOA_27.02.2019_00h00	4.68994e-06	0.00869045	7.26632e-06	1.45326e-05	[4, 5, 6, 7]	Group09	14.8649	22	[ADRB2, ATG7, BECN1, CDC37, CLEC16A, HIF1A, HSPB8, OPTN, PIP4K2C, PLK2, PLK3, PRKAB1, SESN1, SESN2, SH3GLB1, SIRT1, SMCR8, SPTLC1, TP53INP1, TRIM22, TRIM8, VPS13C]
GO:0016241	regulation of macroautophagy	GO_BiologicalProcess-EBI-UniProt-GOA_27.02.2019_00h00	1.67122e-06	0.00313688	7.26632e-06	1.45326e-05	[5, 6, 7]	Group09	13.8462	27	[ADRB2, ATP6V0A1, ATP6V1B2, ATP6V1D, ATP6V1E1, BECN1, CAPN1, CDC37, CHMP4B, CLEC16A, CSPG4, EXOC7, HIF1A, HSPB8, OPTN, PIP4K2C, POLDIP2, PRKAB1, PRKAB2, SESN1, SESN2, SH3GLB1, SIRT1, SMCR8, SPTLC1, TIGAR, VPS13C]
GO:0016239	positive regulation of macroautophagy	GO_BiologicalProcess-EBI-UniProt-GOA_27.02.2019_00h00	2.21382e-06	0.00413321	7.26632e-06	1.45326e-05	[5, 6, 7, 8]	Group09	19.7531	16	[ADRB2, BECN1, CDC37, CLEC16A, HIF1A, HSPB8, OPTN, PIP4K2C, PRKAB1, SESN1, SESN2, SH3GLB1, SIRT1, SMCR8, SPTLC1, VPS13C]
GO:0032879	regulation of localization	GO_BiologicalProcess-EBI-UniProt-GOA_27.02.2019_00h00	1.92305e-07	0.000367687	1.454e-08	1.7448e-07	[2, 3]	Group10	6.86954	228	[ABCA12, ABHD5, ACHE, ACTN1, ACVR1B, ADAMTS1, ADCY8, ADRB2, AKIRIN1, ANK3, ANKRD13A, ANXA2, ANXA4, APLP2, ASTN2, ATP1A1, BAK1, BAX, BBC3, BBS4, BCL2L1, BCL6, BDNF, BDNF-AS, BECN1, C3, CAPN1, CCM2, CCR7, CCT5, CCT6A, CCT7, CD274, CDC42EP4, CDKN1A, CEP250, CHRD, CITED2, CLU, CSF1, CSNK2B, CSTA, CTSB, CXCL16, DCP1B, DHRS3, DPH3, DSC3, DSG2, DUOX2, DUOXA2, DUSP1, DUSP10, EDEM1, EDN2, EHD1, ENC1, ENPP…
GO:0040012	regulation of locomotion	GO_BiologicalProcess-EBI-UniProt-GOA_27.02.2019_00h00	5.262e-07	0.000999253	1.454e-08	1.7448e-07	[2, 3]	Group10	8.26645	103	[ACVR1B, ADAMTS1, AKIRIN1, APLP2, BBS4, CCR7, CD274, CHMP4B, CHRD, CITED2, CSF1, CSNK2B, CTSB, CXCL16, DCP1B, DDB1, DUOX2, DUOXA2, DUSP1, DUSP10, EDN2, ENC1, ENPP2, EPB41L4B, EPHA2, EPPK1, F3, FBXO44, FBXW7, FGF2, FLRT2, FRMD5, GNPDA1, GPNMB, GSTP1, HIF1A, HRAS, ICAM1, IL24, IL6R, ITGA2, ITGA3, JAG1, KRT17, LGMN, MAP2K3, MCC, MDM2, MPRIP, MTA2, MYO1E, NELL2, NEU1, NMB, NRG1, NRP2, NSMF, NTN1, OPT…
GO:0048870	cell motility	GO_BiologicalProcess-EBI-UniProt-GOA_27.02.2019_00h00	8.29354e-07	0.00156997	1.454e-08	1.7448e-07	[2, 3]	Group10	7.35223	153	[ACVR1B, ADAMTS1, ADCY8, AKIRIN1, APLP2, ARPC5L, BAMBI, BAX, BBS4, C3, CCR7, CD274, CDKN1A, CFL1, CHRD, CITED2, CLU, CSF1, CSNK2B, CSPG4, CTSB, CXADR, CXCL16, DCP1B, DDR1, DDX39B, DNAH17, DUOX2, DUOXA2, DUSP1, DUSP10, EDN2, EFNB1, ENC1, ENPP2, EPB41L4B, EPHA2, EPHA4, EPPK1, F11R, F3, FAT1, FBXO44, FBXW7, FGF2, FLRT2, FRMD5, GDNF, GNPDA1, GPC1, GPNMB, GPX1, GSTP1, HIF1A, HIST1H1T, HRAS, ICAM1, ID1…
GO:0016477	cell migration	GO_BiologicalProcess-EBI-UniProt-GOA_27.02.2019_00h00	1.18804e-06	0.00223946	1.454e-08	1.7448e-07	[3, 4]	Group10	7.44849	141	[ACVR1B, ADAMTS1, AKIRIN1, APLP2, ARPC5L, BAMBI, BAX, BBS4, CCR7, CD274, CDKN1A, CFL1, CHRD, CITED2, CLU, CSF1, CSNK2B, CSPG4, CTSB, CXADR, CXCL16, DCP1B, DDR1, DDX39B, DUSP1, DUSP10, EDN2, EFNB1, ENC1, ENPP2, EPB41L4B, EPHA2, EPHA4, EPPK1, F11R, F3, FAT1, FBXO44, FBXW7, FGF2, FLRT2, FRMD5, GDNF, GNPDA1, GPC1, GPNMB, GPX1, GSTP1, HIF1A, HRAS, ICAM1, ID1, IL24, IL6R, ITGA2, ITGA3, ITGB6, JAG1, KLF…
GO:0051270	regulation of cellular component movement	GO_BiologicalProcess-EBI-UniProt-GOA_27.02.2019_00h00	7.72957e-07	0.00146475	1.454e-08	1.7448e-07	[3, 4]	Group10	8.1862	102	[ACTN1, ACVR1B, ADAMTS1, AKIRIN1, APLP2, ATP1A1, BBS4, BCL6, CCR7, CD274, CHRD, CITED2, CSF1, CSNK2B, CTSB, CXCL16, DCP1B, DSC3, DSG2, DUOX2, DUOXA2, DUSP1, DUSP10, EDN2, ENC1, ENPP2, EPB41L4B, EPHA2, EPPK1, F3, FBXO44, FBXW7, FGF2, FLRT2, FRMD5, GNPDA1, GPNMB, GSTP1, HIF1A, HRAS, ICAM1, IL24, IL6R, ITGA2, ITGA3, JAG1, LGMN, MAP2K3, MCC, MDM2, MPRIP, MTA2, MYO1E, NELL2, NEU1, NMB, NRG1, NRP2, NSM…
GO:2000145	regulation of cell motility	GO_BiologicalProcess-EBI-UniProt-GOA_27.02.2019_00h00	9.66314e-07	0.00182537	1.454e-08	1.7448e-07	[3, 4, 5]	Group10	8.283	96	[ACVR1B, ADAMTS1, AKIRIN1, APLP2, BBS4, CCR7, CD274, CHRD, CITED2, CSF1, CSNK2B, CTSB, CXCL16, DCP1B, DUOX2, DUOXA2, DUSP1, DUSP10, EDN2, ENC1, ENPP2, EPB41L4B, EPHA2, EPPK1, F3, FBXO44, FBXW7, FGF2, FLRT2, FRMD5, GNPDA1, GPNMB, GSTP1, HIF1A, HRAS, ICAM1, IL24, IL6R, ITGA2, ITGA3, JAG1, LGMN, MAP2K3, MCC, MDM2, MPRIP, MTA2, MYO1E, NELL2, NEU1, NMB, NRG1, NRP2, NSMF, NTN1, OPTN, P2RX4, PDCD6IP, PH…
GO:0030334	regulation of cell migration	GO_BiologicalProcess-EBI-UniProt-GOA_27.02.2019_00h00	2.69359e-06	0.00501278	1.454e-08	1.7448e-07	[4, 5, 6]	Group10	8.27206	90	[ACVR1B, ADAMTS1, AKIRIN1, APLP2, CCR7, CD274, CHRD, CITED2, CSF1, CSNK2B, CTSB, CXCL16, DCP1B, DUSP1, DUSP10, EDN2, ENC1, ENPP2, EPB41L4B, EPHA2, EPPK1, F3, FBXO44, FBXW7, FGF2, FLRT2, FRMD5, GNPDA1, GPNMB, GSTP1, HIF1A, HRAS, ICAM1, IL24, IL6R, ITGA2, ITGA3, JAG1, LGMN, MAP2K3, MCC, MDM2, MPRIP, MTA2, MYO1E, NELL2, NMB, NRG1, NRP2, NSMF, NTN1, OPTN, P2RX4, PDCD6IP, PLK2, PLPP3, PLXNB1, PLXNB2, …
GO:0012501	programmed cell death	GO_BiologicalProcess-EBI-UniProt-GOA_27.02.2019_00h00	8.31733e-11	1.61107e-07	4.42097e-12	6.18936e-11	[3]	Group11	7.75432	202	[ACER2, ACTN1, ACVR1B, ADM, ADRB2, AEN, ALDH1A2, ALK, ANXA4, APLP1, ARHGAP10, ATF3, ATF5, ATG7, ATOX1, BAG1, BAK1, BAX, BBC3, BCL2L1, BCL6, BDNF, BDNF-AS, BECN1, BIK, BLCAP, BLOC1S2, BRMS1, C3, CAPN1, CASP10, CCR7, CD274, CDIP1, CDKN1A, CFL1, CITED2, CLU, CSTA, CTSB, CTSL, CXADR, CYFIP2, CYP26B1, DCUN1D3, DDB1, DFFA, DHRS2, DNASE1, DOCK3, DRAXIN, DSC3, DSG2, DUSP1, DUSP6, EDA2R, EGLN3, EI24, EIF2…
GO:0023056	positive regulation of signaling	GO_BiologicalProcess-EBI-UniProt-GOA_27.02.2019_00h00	2.80919e-07	0.000535432	4.42097e-12	6.18936e-11	[2, 3, 4]	Group11	7.31707	168	[ACPP, ACVR1B, ADCY8, ADGRV1, ADRB2, AKAP12, ALK, ANXA2, APLP2, ARL4C, ATF3, AVPI1, BAK1, BAMBI, BAX, BBC3, BCL2L1, BDNF, BDNF-AS, BECN1, BIK, C3, CAPRIN2, CASP10, CCM2, CCR7, CDKN1A, CITED2, CLEC16A, CLU, CSF1, CSF3, CSNK1G1, CSNK2B, CSPG4, CSTA, CTSB, CYFIP2, DHRS3, DOCK3, DUSP5, DUSP6, EDA2R, EGR2, ELF3, EPHA4, F3, FAS, FBXO44, FBXW7, FGF2, FGF23, FGFR2, FLOT1, FZD5, GADD45A, GADD45B, GDF15, G…
GO:0070997	neuron death	GO_BiologicalProcess-EBI-UniProt-GOA_27.02.2019_00h00	2.02898e-06	0.00379217	4.42097e-12	6.18936e-11	[3]	Group11	10.4348	48	[ATG7, BAX, BBC3, BCL2L1, BDNF, BDNF-AS, BTBD10, CHMP4B, CLU, CSF1, CSF3, DPYSL4, DRAXIN, EGLN3, EIF4G1, FBXO44, FBXW7, FOXQ1, GCLC, GDNF, GNPDA1, GPNMB, GPX1, HIF1A, HRAS, LGMN, MCL1, MDK, MYB, NAMPT, NEFL, NMB, NQO1, NSMF, OPTN, PIGT, SIRT1, SLC9A1, SOD2, SSH1, STAMBP, STAT3, TFRC, TIGAR, TMEFF2, TNFRSF21, TXNRD1, ZPR1]
GO:0010941	regulation of cell death	GO_BiologicalProcess-EBI-UniProt-GOA_27.02.2019_00h00	5.82587e-09	1.12323e-05	4.42097e-12	6.18936e-11	[3, 4]	Group11	7.75662	167	[ACER2, ACTN1, ADM, ADRB2, ALDH1A2, ALK, ANXA4, ARHGAP10, ATF3, ATF5, ATG7, ATOX1, BAG1, BAK1, BAX, BBC3, BCL2L1, BCL6, BDNF, BDNF-AS, BECN1, BIK, BRMS1, BTBD10, C3, CASP10, CCR7, CD274, CDKN1A, CFL1, CHMP4B, CITED2, CLU, CSF1, CSF3, CSTA, CTSB, DCUN1D3, DDB1, DFFA, DHRS2, DOCK3, DRAXIN, DUSP1, DUSP6, EGLN3, EIF2B5, EIF4G1, F3, FAS, FBXO44, FBXW7, FEM1B, FGF2, FGFR2, FOSL1, FOXQ1, FTH1, GADD45A, …
GO:0006915	apoptotic process	GO_BiologicalProcess-EBI-UniProt-GOA_27.02.2019_00h00	4.12678e-10	7.98945e-07	4.42097e-12	6.18936e-11	[4]	Group11	7.72986	190	[ACER2, ACTN1, ACVR1B, ADM, ADRB2, AEN, ALDH1A2, ALK, ANXA4, APLP1, ARHGAP10, ATF3, ATF5, ATG7, ATOX1, BAG1, BAK1, BAX, BBC3, BCL2L1, BCL6, BDNF, BDNF-AS, BECN1, BIK, BLCAP, BLOC1S2, BRMS1, C3, CASP10, CCR7, CD274, CDIP1, CDKN1A, CFL1, CITED2, CLU, CSTA, CTSB, CTSL, CYFIP2, DCUN1D3, DDB1, DFFA, DHRS2, DNASE1, DOCK3, DRAXIN, DUSP1, DUSP6, EDA2R, EGLN3, EI24, EIF2B5, EPHA2, F3, FAS, FBXO44, FBXW7, …
GO:0010647	positive regulation of cell communication	GO_BiologicalProcess-EBI-UniProt-GOA_27.02.2019_00h00	2.01482e-07	0.00038483	4.42097e-12	6.18936e-11	[3, 4, 5]	Group11	7.3523	168	[ACPP, ACVR1B, ADCY8, ADGRV1, ADRB2, AKAP12, ALK, ANK3, APLP2, ARL4C, ATF3, AVPI1, BAK1, BAMBI, BAX, BBC3, BCL2L1, BDNF, BDNF-AS, BECN1, BIK, C3, CAPRIN2, CASP10, CCM2, CCR7, CDKN1A, CITED2, CLEC16A, CLU, CSF1, CSF3, CSNK1G1, CSNK2B, CSPG4, CSTA, CTSB, CYFIP2, DHRS3, DOCK3, DUSP5, DUSP6, EDA2R, EGR2, ELF3, EPHA4, F3, FAS, FBXO44, FBXW7, FGF2, FGF23, FGFR2, FLOT1, FZD5, GADD45A, GADD45B, GDF15, GN…
GO:0060548	negative regulation of cell death	GO_BiologicalProcess-EBI-UniProt-GOA_27.02.2019_00h00	2.31266e-08	4.44494e-05	4.42097e-12	6.18936e-11	[3, 4, 5]	Group11	8.54503	111	[ADRB2, ANXA4, ARHGAP10, ATF5, ATG7, ATOX1, BAG1, BAX, BCL2L1, BCL6, BDNF, BDNF-AS, BECN1, BTBD10, C3, CCR7, CDKN1A, CFL1, CHMP4B, CITED2, CLU, CSF1, CSF3, CSTA, CTSB, DDB1, DFFA, DHRS2, DOCK3, DRAXIN, DUSP1, EIF4G1, FAS, FGF2, FGFR2, FOXQ1, FTH1, GCLC, GDNF, GNPDA1, GPNMB, GPX1, GSTP1, HIF1A, HIP1R, HRAS, HSP90AB1, ICAM1, ID1, IER3, IKBKB, KRT18, LAMP3, LGMN, LRPAP1, MCL1, MDK, MDM2, MSX2, NAA15…
GO:0009967	positive regulation of signal transduction	GO_BiologicalProcess-EBI-UniProt-GOA_27.02.2019_00h00	3.5663e-07	0.000679024	4.42097e-12	6.18936e-11	[3, 4, 5, 6]	Group11	7.43762	155	[ACPP, ACVR1B, ADGRV1, ADRB2, AKAP12, ALK, APLP2, ARL4C, ATF3, AVPI1, BAK1, BAMBI, BAX, BBC3, BCL2L1, BDNF, BDNF-AS, BECN1, BIK, C3, CAPRIN2, CASP10, CCM2, CCR7, CDKN1A, CITED2, CLEC16A, CSF1, CSF3, CSNK1G1, CSNK2B, CSPG4, CTSB, CYFIP2, DHRS3, DOCK3, DUSP5, DUSP6, EDA2R, EGR2, ELF3, EPHA4, F3, FAS, FBXO44, FBXW7, FGF2, FGF23, FGFR2, FLOT1, FZD5, GADD45A, GADD45B, GDF15, GNAS, GPNMB, GPX1, GSDME, …
GO:0043067	regulation of programmed cell death	GO_BiologicalProcess-EBI-UniProt-GOA_27.02.2019_00h00	5.98927e-08	0.000114934	4.42097e-12	6.18936e-11	[4, 5]	Group11	7.68458	153	[ACER2, ACTN1, ADM, ADRB2, ALDH1A2, ALK, ANXA4, ARHGAP10, ATF3, ATF5, ATG7, ATOX1, BAG1, BAK1, BAX, BBC3, BCL2L1, BCL6, BDNF, BDNF-AS, BECN1, BIK, BRMS1, C3, CASP10, CCR7, CD274, CDKN1A, CFL1, CITED2, CLU, CSTA, CTSB, DCUN1D3, DDB1, DFFA, DHRS2, DOCK3, DRAXIN, DUSP1, DUSP6, EGLN3, EIF2B5, F3, FAS, FBXO44, FBXW7, FEM1B, FGFR2, FOSL1, FOXQ1, GADD45A, GADD45B, GAS1, GCLC, GDF15, GDNF, GNPDA1, GPX1, …
GO:0043069	negative regulation of programmed cell death	GO_BiologicalProcess-EBI-UniProt-GOA_27.02.2019_00h00	3.99761e-07	0.000760745	4.42097e-12	6.18936e-11	[4, 5, 6]	Group11	8.37563	99	[ADRB2, ANXA4, ARHGAP10, ATF5, ATOX1, BAG1, BAX, BCL2L1, BCL6, BDNF, BDNF-AS, BECN1, C3, CCR7, CDKN1A, CFL1, CITED2, CLU, CSTA, CTSB, DDB1, DFFA, DHRS2, DOCK3, DRAXIN, DUSP1, FAS, FGFR2, FOXQ1, GCLC, GDNF, GNPDA1, GPX1, GSTP1, HIF1A, HIP1R, HRAS, HSP90AB1, ICAM1, ID1, IER3, IKBKB, KRT18, LAMP3, LGMN, MCL1, MDK, MDM2, MSX2, NAA15, NEFL, NQO1, OPTN, PA2G4, PIDD1, PIM1, PLK2, PLK3, POR, PPIF, PRKAB1…
GO:0043066	negative regulation of apoptotic process	GO_BiologicalProcess-EBI-UniProt-GOA_27.02.2019_00h00	8.9563e-07	0.00169364	4.42097e-12	6.18936e-11	[5, 6, 7]	Group11	8.31169	96	[ADRB2, ANXA4, ARHGAP10, ATF5, ATOX1, BAG1, BAX, BCL2L1, BCL6, BDNF, BDNF-AS, BECN1, C3, CCR7, CDKN1A, CFL1, CITED2, CLU, CSTA, CTSB, DDB1, DFFA, DHRS2, DOCK3, DRAXIN, DUSP1, FAS, FGFR2, FOXQ1, GCLC, GDNF, GNPDA1, GPX1, GSTP1, HIF1A, HIP1R, HRAS, HSP90AB1, ICAM1, ID1, IER3, IKBKB, KRT18, LAMP3, LGMN, MCL1, MDK, MDM2, MSX2, NAA15, NEFL, NQO1, OPTN, PA2G4, PIDD1, PIM1, PLK2, PLK3, POR, PPIF, PRKAB1…
GO:0009653	anatomical structure morphogenesis	GO_BiologicalProcess-EBI-UniProt-GOA_27.02.2019_00h00	6.71787e-09	1.29453e-05	9.07122e-08	9.97834e-07	[2, 3]	Group12	7.14961	227	[ACTN1, ADAMTS1, ADGRG6, ADM, ALDH1A2, ANGPTL2, ANK3, ANXA2, APLP1, APOBEC3C, AQP3, ASTN2, ASXL3, ATP6V1B2, BAG1, BAK1, BAMBI, BAX, BBS4, BBS7, BCL2L1, BCL6, BDNF, BDNF-AS, BHLHE40, C2CD3, C3, CABYR, CAPN1, CAPRIN2, CCM2, CDC42EP3, CDC42EP4, CDH8, CEP250, CFL1, CHRD, CITED2, CLU, COL27A1, COL7A1, CPE, CPM, CRABP2, CSF1, CSNK2B, CSPG4, CSTA, CTSB, CYFIP2, CYP26B1, DDR1, DHRS3, DOCK3, DPYSL4, DRAXI…
GO:0050793	regulation of developmental process	GO_BiologicalProcess-EBI-UniProt-GOA_27.02.2019_00h00	2.9344e-07	0.000559003	9.07122e-08	9.97834e-07	[2, 3]	Group12	6.89873	218	[ABCA5, ACVR1B, ADAMTS7, ADGRV1, ADM, ADRB2, AGRN, AKIRIN1, ALK, ANGPTL2, ANXA2, APLP2, AQP3, BAG1, BAMBI, BAX, BBS4, BCL6, BDNF, BDNF-AS, BHLHE40, BMP2K, C21orf91, C3, CAPRIN2, CCDC3, CCDC71L, CD274, CDC42EP3, CDC42EP4, CDKN1A, CEP250, CFL1, CHRD, CITED2, CRABP2, CSF1, CSF3, CTSB, CTSL, CXADR, CYP26B1, DCP1B, DDX39B, DHRS3, DOCK3, DRAXIN, DUSP10, DUSP6, EGR2, EHD1, EIF4G1, ENC1, ENPP2, EPHA2, EP…
GO:0051239	regulation of multicellular organismal process	GO_BiologicalProcess-EBI-UniProt-GOA_27.02.2019_00h00	9.05579e-07	0.00171154	9.07122e-08	9.97834e-07	[2, 3]	Group12	6.61726	250	[ACHE, ACPP, ACSL1, ACVR1B, ADAMTS7, ADGRV1, ADM, ADRB2, AGRN, AKIRIN1, ALK, ANGPTL2, ANXA2, ANXA4, APLP2, APOBEC3C, AQP3, ASB1, ATP1A1, BAG1, BAMBI, BAX, BBS4, BCL6, BDNF, BDNF-AS, BECN1, BHLHE40, BMP2K, C21orf91, C3, CAPRIN2, CCM2, CCR7, CD274, CDKN1A, CFL1, CHRD, CITED2, CLU, CRABP2, CSF1, CSF3, CSNK2B, CTSB, CTSL, CXADR, CYP26B1, DCP1B, DDX39B, DHRS3, DOCK3, DRAXIN, DSC3, DSG2, DUSP10, DUSP6,…
GO:0009888	tissue development	GO_BiologicalProcess-EBI-UniProt-GOA_27.02.2019_00h00	3.75981e-09	7.26395e-06	9.07122e-08	9.97834e-07	[3]	Group12	7.56713	186	[ABCA12, ACVR1B, ADAMTS7, ADGRV1, ADM, ADRB2, AKIRIN1, ALDH1A2, ANXA2, ANXA4, AQP3, ASTN2, ATF3, BAG1, BAMBI, BAX, BBS4, BBS7, BHLHE40, BMP2K, C2CD3, C3, CAPN1, CCM2, CDKN1A, CES2, CFL1, CHRD, CITED2, CLDN1, COL27A1, COL7A1, CRABP2, CSF1, CSNK2B, CSPG4, CSTA, CTSB, CTSL, CXADR, CYP26B1, DDR1, DDX39B, DOCK3, DSC3, DSG2, DUOX2, DUSP10, E2F7, EDA2R, EFNB1, EGR2, ELF3, EPHA2, EPHA4, EPPK1, ETS2, ETV5…
GO:0030154	cell differentiation	GO_BiologicalProcess-EBI-UniProt-GOA_27.02.2019_00h00	1.3575e-06	0.00255618	9.07122e-08	9.97834e-07	[3]	Group12	6.33014	311	[ABCA12, ABCA5, ABHD5, ACHE, ACTN1, ACVR1B, ADAMTS7, ADGRG6, ADGRV1, ADM, ADRB2, AGRN, AKIRIN1, ALDH1A2, ALK, ANGPTL2, ANK3, ANXA2, ANXA4, APLP2, APOBEC3C, AQP3, ATF3, ATF5, BAG1, BAK1, BAMBI, BAX, BBS4, BBS7, BCL2L1, BCL6, BDNF, BDNF-AS, BECN1, BHLHE40, BLOC1S2, C21orf91, C3, CABYR, CAPN1, CAPRIN2, CATSPERG, CCDC3, CCDC71L, CCM2, CCR7, CDH23, CDKN1A, CES2, CFL1, CHRD, CITED2, CLDN1, CLU, COL27A1…
GO:0042127	regulation of cell population proliferation	GO_BiologicalProcess-EBI-UniProt-GOA_27.02.2019_00h00	8.55875e-07	0.00161931	9.07122e-08	9.97834e-07	[2, 3, 4]	Group12	7.36138	154	[ACER2, ADAMTS1, ADM, AKIRIN1, ALDH1A2, ALK, ANXA2, APLP2, ATF3, ATF5, BAG1, BAK1, BAMBI, BAX, BCL2L1, BCL6, BECN1, BHLHE40, BTG3, CAPN1, CCM2, CCNA1, CD274, CD55, CDKN1A, CHRD, CITED2, CLU, CSF1, CSF3, CSNK2B, CSTA, CTSB, CXADR, DCP1B, DDR1, DDX39B, DHRS2, DOCK3, DOT1L, DUSP1, DUSP10, E2F7, EDN2, EFNB1, EGLN3, EIF4G1, EPPK1, ETV5, F3, FBXO2, FBXO44, FBXW7, FGF2, FGF23, FGFR2, FOSL1, FTH1, FZD5, …
GO:0048646	anatomical structure formation involved in morphogenesis	GO_BiologicalProcess-EBI-UniProt-GOA_27.02.2019_00h00	7.57321e-07	0.00143588	9.07122e-08	9.97834e-07	[2, 3, 4]	Group12	8.03835	109	[ACTN1, ADAMTS1, ADGRG6, ADM, ALDH1A2, ANXA2, APOBEC3C, BBS4, BCL6, BHLHE40, C3, CFL1, CHRD, CITED2, COL7A1, CSPG4, CTSB, DOCK3, E2F7, EGR2, EHD1, ENPP2, EPHA2, ERAP1, ETS2, F3, FBXO44, FBXW7, FGF2, FGFR2, FLOT1, FZD5, GDF15, GDNF, GNAS, GNPDA1, GPC1, GPNMB, GPX1, GRHL3, HAND1, HES6, HIF1A, ID1, IL4R, ITGA2, ITGA3, JAG1, KLF5, KLHL12, KRT19, KRT8, LAMB3, LIPC, MAFB, MBOAT7, MEIS1, MFGE8, MSX2, MT…
GO:0035295	tube development	GO_BiologicalProcess-EBI-UniProt-GOA_27.02.2019_00h00	2.8786e-06	0.00535131	9.07122e-08	9.97834e-07	[3, 4]	Group12	7.96875	102	[ABCA12, ADM, ALDH1A2, ANXA2, APOBEC3C, ASS1, ATOX1, BAG1, BAK1, BAX, BBS4, BBS7, C2CD3, C3, CCM2, CDKN1A, CFL1, CHRD, CITED2, CSF1, CSNK2B, CSPG4, CSTA, CTSB, DDR1, DOCK3, E2F7, EDN2, EIF4G1, ENPP2, EPHA2, EPHA4, ERAP1, ETV5, F3, FBXO44, FBXW7, FGF2, FGFR2, FZD5, GDNF, GPNMB, GPX1, GRHL3, HAND1, HIF1A, HRAS, ID1, ID2, ITGA3, JAG1, KLF5, LIF, LIPC, MEIS1, MFGE8, MICAL2, MSX2, MYO1E, NAA15, NCL, N…
GO:0045595	regulation of cell differentiation	GO_BiologicalProcess-EBI-UniProt-GOA_27.02.2019_00h00	2.63341e-06	0.00490341	9.07122e-08	9.97834e-07	[3, 4]	Group12	7.13971	162	[ABCA5, ACVR1B, ADAMTS7, ADGRV1, ADM, AKIRIN1, ALK, ANGPTL2, ANXA2, APLP2, AQP3, BAG1, BAMBI, BCL6, BDNF, BDNF-AS, BHLHE40, C21orf91, C3, CAPRIN2, CCDC3, CCDC71L, CDKN1A, CFL1, CHRD, CITED2, CRABP2, CSF1, CSF3, CTSL, CYP26B1, DDX39B, DHRS3, DOCK3, DRAXIN, DUSP10, EGR2, EHD1, EIF4G1, ENC1, EPHA4, ETV5, FADS1, FAM210B, FBXO22, FBXO44, FBXW7, FGF2, FGF23, FGFR2, FKBP4, FLOT1, FLRT2, GDF15, GDNF, GNA…
GO:0048729	tissue morphogenesis	GO_BiologicalProcess-EBI-UniProt-GOA_27.02.2019_00h00	2.4521e-06	0.00457071	9.07122e-08	9.97834e-07	[3, 4]	Group12	8.88078	73	[ADM, ALDH1A2, ASTN2, BBS4, BBS7, C2CD3, CCM2, CFL1, CHRD, CITED2, COL7A1, CSF1, CSNK2B, CSTA, CTSB, DDR1, DOCK3, EPHA2, EPHA4, ETV5, FEM1B, FGF2, FGFR2, FOXQ1, FZD5, GCNT4, GDNF, GNPDA1, GRHL3, HAND1, HIF1A, HRAS, ITGA2, ITGA3, JAG1, KRT17, LIF, LIPC, MDM2, MICAL2, MLF2, MSX2, NELL2, NKX3-1, NRG1, NRP2, NTN1, OPTN, PDCD6IP, PLXNB2, PRICKLE2, PRKX, PSMD1, PSMD8, PSME2, PSMF1, RDH10, RHOC, SDC4, S…
GO:2000026	regulation of multicellular organismal development	GO_BiologicalProcess-EBI-UniProt-GOA_27.02.2019_00h00	2.15378e-06	0.00402327	9.07122e-08	9.97834e-07	[3, 4]	Group12	7.02381	177	[ACVR1B, ADAMTS7, ADGRV1, ADM, ADRB2, AGRN, AKIRIN1, ALK, ANGPTL2, ANXA2, APLP2, AQP3, BAG1, BAMBI, BAX, BCL6, BDNF, BDNF-AS, BHLHE40, BMP2K, C21orf91, C3, CAPRIN2, CD274, CDKN1A, CFL1, CITED2, CRABP2, CSF1, CSF3, CTSB, CTSL, CXADR, CYP26B1, DCP1B, DDX39B, DHRS3, DOCK3, DRAXIN, DUSP10, DUSP6, EGR2, EHD1, EIF4G1, ENC1, ENPP2, EPHA2, EPHA4, ERAP1, ETV5, F3, FAM210B, FBXO22, FBXO44, FBXW7, FGF2, FGF…
GO:0035239	tube morphogenesis	GO_BiologicalProcess-EBI-UniProt-GOA_27.02.2019_00h00	4.76279e-06	0.00882068	9.07122e-08	9.97834e-07	[3, 4, 5]	Group12	8.27719	86	[ADM, ANXA2, APOBEC3C, BAK1, BAX, BBS4, BBS7, C2CD3, C3, CCM2, CFL1, CITED2, CSF1, CSNK2B, CSPG4, CTSB, DDR1, DOCK3, E2F7, ENPP2, EPHA2, EPHA4, ERAP1, ETV5, F3, FBXO44, FBXW7, FGF2, FGFR2, FZD5, GDNF, GPNMB, GPX1, GRHL3, HAND1, HIF1A, HRAS, ID1, ID2, JAG1, KLF5, LIPC, MEIS1, MFGE8, MICAL2, MSX2, MYO1E, NAA15, NCL, NELL2, NEU1, NKX3-1, NMB, NRCAM, NRG1, NRP2, NTN1, OPTN, PDCD6IP, PKM, PLCD1, PLK2,…
GO:0060429	epithelium development	GO_BiologicalProcess-EBI-UniProt-GOA_27.02.2019_00h00	1.99206e-07	0.000380683	9.07122e-08	9.97834e-07	[4]	Group12	7.97428	124	[ABCA12, ACVR1B, ADM, ALDH1A2, ANXA2, ANXA4, AQP3, ASTN2, BAG1, BAX, BBS4, BBS7, BHLHE40, C2CD3, CAPN1, CCM2, CDKN1A, CES2, CFL1, CHRD, CITED2, CLDN1, CSF1, CSNK2B, CSTA, CTSB, CTSL, CYP26B1, DDR1, DOCK3, DSC3, DSG2, DUSP10, E2F7, ELF3, EPHA2, EPHA4, EPPK1, ETV5, F11R, FAS, FEM1B, FGF2, FGFR2, FOXQ1, FZD5, GDNF, GNAS, GPX1, GRHL3, H2AFY, HAND1, HES6, HIF1A, HRAS, HRNR, ICAM1, ID1, ID2, IKBKB, ITG…
GO:0002009	morphogenesis of an epithelium	GO_BiologicalProcess-EBI-UniProt-GOA_27.02.2019_00h00	1.63947e-06	0.00307892	9.07122e-08	9.97834e-07	[4, 5]	Group12	9.43683	62	[ADM, ALDH1A2, ASTN2, BBS4, BBS7, C2CD3, CCM2, CFL1, CITED2, CSF1, CSNK2B, CSTA, CTSB, DDR1, DOCK3, EPHA2, EPHA4, ETV5, FEM1B, FGF2, FGFR2, FOXQ1, FZD5, GDNF, GRHL3, HAND1, HIF1A, HRAS, JAG1, KRT17, LIF, LIPC, MICAL2, MLF2, MSX2, NKX3-1, NTN1, OPTN, PDCD6IP, PLXNB2, PRICKLE2, PRKX, PSMD1, PSMD8, PSME2, PSMF1, RDH10, RHOC, SDC4, SERPIND1, SHROOM3, SLPI, SOCS3, SOX11, SPINT1, SPRY2, TEP1, TMEFF2, T…
GO:0048518	positive regulation of biological process	GO_BiologicalProcess-EBI-UniProt-GOA_27.02.2019_00h00	8.88548e-13	1.72556e-09	1.55003e-05	1.55003e-05	[1, 2, 3]	Group13	6.4858	459	[ABCA12, ABHD5, ACER2, ACHE, ACPP, ACSL1, ACTBL2, ACTN1, ACVR1B, ADAMTS1, ADCY8, ADGRV1, ADM, ADRB2, AGRN, AKAP12, AKIRIN1, ALDH1A2, ALK, ANGPTL2, ANK1, ANK3, ANXA2, APLP2, AQP3, ARL4C, ARPC5L, ASS1, ASXL3, ATF3, ATF5, ATG7, ATP1A1, AVPI1, BAG1, BAK1, BAMBI, BAX, BBC3, BBS4, BBS7, BCL2L1, BCL6, BDNF, BDNF-AS, BECN1, BHLHE40, BIK, BRMS1, BTBD10, BUD23, C21orf91, C3, C6orf89, CABYR, CAMKK1, CAPN1, …
GO:0048519	negative regulation of biological process	GO_BiologicalProcess-EBI-UniProt-GOA_27.02.2019_00h00	4.78041e-09	9.22141e-06	1.55003e-05	1.55003e-05	[1, 2, 3]	Group13	6.35505	397	[ABCA5, ABHD5, ACER2, ACHE, ACMSD, ACTN1, ACVR1B, ADAMTS1, ADAMTS7, ADCY8, ADGRV1, ADM, ADRB2, AK1, AKIRIN1, ALDH1A2, ANGPTL2, ANK3, ANKRD13A, ANXA2, ANXA4, APLP1, APLP2, APOBEC3C, ARHGAP10, ASB1, ASS1, ASTN2, ATF3, ATF5, ATG7, ATOX1, ATP1A1, BAG1, BAK1, BAMBI, BAX, BBC3, BBS4, BCL2L1, BCL6, BDNF, BDNF-AS, BECN1, BHLHE40, BRMS1, BTBD10, BTG3, BUB3, C3, C6orf89, CAPRIN2, CC2D1B, CCDC3, CCM2, CCR7,…
GO:0019222	regulation of metabolic process	GO_BiologicalProcess-EBI-UniProt-GOA_27.02.2019_00h00	1.87104e-06	0.00350446	1.55003e-05	1.55003e-05	[2, 3]	Group13	5.93421	451	[ABHD5, ACER2, ACHE, ACMSD, ACSL1, ACTBL2, ACTN1, ACVR1B, ADCY8, ADM, ADRB2, AGRN, ALDH1A2, ALK, ANGPTL2, ANK3, ANKRD13A, ANXA2, ANXA4, APLP2, APOBEC3C, ASB1, ASS1, ASXL3, ATF3, ATF5, ATG7, ATOX1, ATP1A1, ATP6V0A1, ATP6V1B2, ATP6V1D, ATP6V1E1, AVPI1, BAG1, BAK1, BAMBI, BAX, BBC3, BBS4, BBS7, BCL6, BDNF, BDNF-AS, BECN1, BHLHE40, BRMS1, BTBD10, BUD23, C2CD3, C3, C6orf89, CAMKK1, CAPN1, CAPRIN2, CAS…
GO:0023051	regulation of signaling	GO_BiologicalProcess-EBI-UniProt-GOA_27.02.2019_00h00	1.03845e-07	0.000198656	1.55003e-05	1.55003e-05	[2, 3]	Group13	6.58399	292	[ACHE, ACPP, ACVR1B, ADCY8, ADGRV1, ADM, ADRB2, AKAP12, ALK, ANXA2, APLP1, APLP2, ARAP2, ARHGAP10, ARL4C, ATF3, ATP1A1, AVPI1, BAK1, BAMBI, BAX, BBC3, BCL2L1, BCL6, BDNF, BDNF-AS, BECN1, BIK, C2CD3, C3, C6orf89, CALCB, CAPN1, CAPRIN2, CASP10, CCDC3, CCM2, CCR7, CD55, CDC37, CDKN1A, CEP250, CHRD, CITED2, CLEC16A, CLU, CRABP2, CSF1, CSF3, CSNK1G1, CSNK2B, CSPG4, CSTA, CTSB, CXADR, CXCL16, CYFIP2, C…
GO:0048583	regulation of response to stimulus	GO_BiologicalProcess-EBI-UniProt-GOA_27.02.2019_00h00	3.43638e-09	6.64251e-06	1.55003e-05	1.55003e-05	[2, 3]	Group13	6.55738	344	[ACPP, ACVR1B, ADCY8, ADGRV1, ADM, ADRB2, AKAP12, AKIRIN1, ALK, ANGPTL2, ANXA2, APLP1, APLP2, ARAP2, ARHGAP10, ARL4C, ATF3, ATG7, AVPI1, BAG1, BAK1, BAMBI, BAX, BBC3, BBS4, BCL2L1, BCL6, BDNF, BDNF-AS, BECN1, BIK, C2CD3, C3, C6orf89, CALCB, CAPN1, CAPRIN2, CASP10, CCDC3, CCM2, CCR7, CD274, CD55, CD59, CDC37, CDKN1A, CEP250, CHRD, CITED2, CLEC16A, CLU, CRABP2, CSF1, CSF3, CSNK1G1, CSNK2B, CSPG4, C…
GO:0006793	phosphorus metabolic process	GO_BiologicalProcess-EBI-UniProt-GOA_27.02.2019_00h00	3.76209e-09	7.26459e-06	1.55003e-05	1.55003e-05	[3]	Group13	6.88705	275	[ABHD5, ACHE, ACMSD, ACPP, ACSL1, ACVR1B, ACYP2, ADCY8, ADK, ADRB2, AK1, ALK, ANXA2, APTX, ARL4C, ATF3, ATP1A1, ATP6V1B2, AVPI1, BAK1, BAX, BDNF, BDNF-AS, BMP2K, BTBD10, C3, C6orf89, CAMKK1, CAPRIN2, CCM2, CCNA1, CCR7, CD2BP2, CDC37, CDKN1A, CFL1, CLU, CSF1, CSF3, CSNK1G1, CSNK2B, CSPG4, CTNS, CTSB, CXADR, DAZAP2, DBI, DCP1B, DCXR, DDR1, DGKA, DGKD, DHRS3, DOCK3, DOLK, DSC3, DUSP1, DUSP10, DUSP4,…
GO:0007165	signal transduction	GO_BiologicalProcess-EBI-UniProt-GOA_27.02.2019_00h00	1.40332e-06	0.00264104	1.55003e-05	1.55003e-05	[2, 3, 4]	Group13	6.01047	425	[ACER2, ACPP, ACSL1, ACVR1B, ADAMTS1, ADCY8, ADGRG6, ADGRV1, ADM, ADRB2, AEN, AGRN, AGTRAP, AKAP12, ALDH1A2, ALK, ANGPTL2, ANK1, ANK3, ANXA2, ANXA4, APLP1, APLP2, ARAP2, ARHGAP10, ARL4C, ASB1, ATF3, ATP6V0A1, ATP6V1B2, ATP6V1D, ATP6V1E1, AVPI1, BAG1, BAK1, BAMBI, BAX, BBC3, BBS4, BBS7, BCL2L1, BCL6, BDNF, BDNF-AS, BECN1, BHLHE40, BIK, BLOC1S2, C2CD3, C3, C6orf89, CA1, CALCB, CAMKK1, CAPN1, CAPRIN…
GO:0009893	positive regulation of metabolic process	GO_BiologicalProcess-EBI-UniProt-GOA_27.02.2019_00h00	1.8738e-11	3.63329e-08	1.55003e-05	1.55003e-05	[2, 3, 4]	Group13	7.05307	303	[ABHD5, ACER2, ACHE, ACSL1, ACTBL2, ACTN1, ACVR1B, ADCY8, ADM, ADRB2, AGRN, ALDH1A2, ALK, ANGPTL2, ANK3, ANXA2, APLP2, ASS1, ASXL3, ATF3, ATF5, ATG7, AVPI1, BAG1, BAK1, BAMBI, BAX, BBC3, BBS7, BCL6, BDNF, BDNF-AS, BECN1, BHLHE40, BRMS1, BTBD10, BUD23, C3, C6orf89, CAMKK1, CAPRIN2, CASP10, CCDC3, CCM2, CCR7, CCT5, CCT6A, CCT7, CDC37, CDKN1A, CITED2, CITED4, CLEC16A, CLU, CREM, CSF1, CSF3, CSNK2B, …
GO:0010033	response to organic substance	GO_BiologicalProcess-EBI-UniProt-GOA_27.02.2019_00h00	6.76553e-12	1.31319e-08	1.55003e-05	1.55003e-05	[3]	Group13	7.20585	286	[ACER2, ACSL1, ACVR1B, ADAMTS7, ADCY8, ADGRG6, ADM, ADRB2, AGRN, AGTRAP, AKR1B10, ALDH1A2, ANGPTL2, ANXA2, APLP1, APLP2, AQP3, ASS1, ATF3, ATG7, ATP1A1, ATP6V0A1, ATP6V1B2, ATP6V1D, ATP6V1E1, BAG1, BAK1, BAMBI, BAX, BBC3, BBS4, BCL2L1, BCL6, BDNF, BDNF-AS, BECN1, C3, CA1, CATSPERG, CCDC3, CCM2, CCR7, CCT6A, CD274, CD55, CDC37, CDC42EP4, CDIP1, CDKN1A, CEP250, CFL1, CHMP1B, CHRD, CITED2, CLDN1, CL…
GO:0023056	positive regulation of signaling	GO_BiologicalProcess-EBI-UniProt-GOA_27.02.2019_00h00	2.80919e-07	0.000535432	1.55003e-05	1.55003e-05	[2, 3, 4]	Group13	7.31707	168	[ACPP, ACVR1B, ADCY8, ADGRV1, ADRB2, AKAP12, ALK, ANXA2, APLP2, ARL4C, ATF3, AVPI1, BAK1, BAMBI, BAX, BBC3, BCL2L1, BDNF, BDNF-AS, BECN1, BIK, C3, CAPRIN2, CASP10, CCM2, CCR7, CDKN1A, CITED2, CLEC16A, CLU, CSF1, CSF3, CSNK1G1, CSNK2B, CSPG4, CSTA, CTSB, CYFIP2, DHRS3, DOCK3, DUSP5, DUSP6, EDA2R, EGR2, ELF3, EPHA4, F3, FAS, FBXO44, FBXW7, FGF2, FGF23, FGFR2, FLOT1, FZD5, GADD45A, GADD45B, GDF15, G…
GO:0023057	negative regulation of signaling	GO_BiologicalProcess-EBI-UniProt-GOA_27.02.2019_00h00	1.92328e-06	0.00359846	1.55003e-05	1.55003e-05	[2, 3, 4]	Group13	7.56949	128	[ACHE, ADCY8, ADM, ADRB2, APLP1, ATF3, BAMBI, BAX, BCL2L1, BCL6, C6orf89, CCDC3, CCM2, CHRD, CLU, CSTA, CYP26B1, DHRS3, DOCK3, DRAXIN, DSC3, DUSP1, DUSP10, DUSP4, DUSP5, DUSP6, EPHA2, FAS, FBXO44, FBXW7, FGF23, GCLC, GDF15, GDNF, GPC1, GPNMB, GPX1, GSTP1, HHAT, HIF1A, HIST1H2BJ, ICAM1, IRF4, ITGA3, KLF6, KLHL12, KREMEN1, LBH, LGMN, LIF, LITAF, LRPAP1, MCC, MCL1, MDM2, NAF1, NCOA3, NEU1, NKX3-1, N…
GO:0044093	positive regulation of molecular function	GO_BiologicalProcess-EBI-UniProt-GOA_27.02.2019_00h00	1.03032e-06	0.00194524	1.55003e-05	1.55003e-05	[3]	Group13	7.24832	162	[ABHD5, ACER2, ACSL1, ADCY8, ADRB2, AGRN, AKR1B10, ALK, ANK3, ANXA2, ARAP2, ARHGAP10, AVPI1, BAK1, BAMBI, BAX, BBC3, BDNF, BDNF-AS, C6orf89, CAMKK1, CAPRIN2, CASP10, CCR7, CCT6A, CDKN1A, CEP250, CLU, CSF1, CSF3, CSPG4, CSTA, CTSB, CYFIP2, DAZAP2, DCP1B, DCUN1D3, DOCK3, DPH3, DUSP5, DUSP6, EDA2R, EDN2, EGLN3, EGR2, EIF4G1, EPHA2, EPHA4, ETAA1, F11R, F3, FAS, FBXO44, FBXW7, FGF2, FGF23, FGFR2, FLOT…
GO:0048522	positive regulation of cellular process	GO_BiologicalProcess-EBI-UniProt-GOA_27.02.2019_00h00	1.09443e-11	2.12319e-08	1.55003e-05	1.55003e-05	[2, 3, 4]	Group13	6.5663	410	[ABHD5, ACER2, ACHE, ACPP, ACSL1, ACTBL2, ACTN1, ACVR1B, ADAMTS1, ADCY8, ADGRV1, ADM, ADRB2, AGRN, AKAP12, AKIRIN1, ALDH1A2, ALK, ANGPTL2, ANK1, ANK3, ANXA2, APLP2, ARL4C, ARPC5L, ASS1, ASXL3, ATF3, ATF5, ATG7, AVPI1, BAG1, BAK1, BAMBI, BAX, BBC3, BBS4, BBS7, BCL2L1, BCL6, BDNF, BDNF-AS, BECN1, BHLHE40, BIK, BRMS1, BTBD10, BUD23, C21orf91, C3, C6orf89, CABYR, CAMKK1, CAPN1, CAPRIN2, CASP10, CCDC3…
GO:0048523	negative regulation of cellular process	GO_BiologicalProcess-EBI-UniProt-GOA_27.02.2019_00h00	1.27833e-08	2.45951e-05	1.55003e-05	1.55003e-05	[2, 3, 4]	Group13	6.43087	360	[ABCA5, ACER2, ACHE, ACMSD, ACTN1, ACVR1B, ADAMTS1, ADAMTS7, ADCY8, ADGRV1, ADM, ADRB2, AK1, AKIRIN1, ALDH1A2, ANGPTL2, ANKRD13A, ANXA2, ANXA4, APLP1, APLP2, APOBEC3C, ARHGAP10, ASB1, ASS1, ATF3, ATF5, ATG7, ATOX1, ATP1A1, BAG1, BAK1, BAMBI, BAX, BBC3, BBS4, BCL2L1, BCL6, BDNF, BDNF-AS, BECN1, BHLHE40, BRMS1, BTBD10, BTG3, BUB3, C3, C6orf89, CAPRIN2, CC2D1B, CCDC3, CCM2, CCR7, CD274, CD2BP2, CDK2…
GO:0048584	positive regulation of response to stimulus	GO_BiologicalProcess-EBI-UniProt-GOA_27.02.2019_00h00	5.17616e-06	0.0095759	1.55003e-05	1.55003e-05	[2, 3, 4]	Group13	6.71911	205	[ACPP, ACVR1B, ADCY8, ADGRV1, ADRB2, AKAP12, AKIRIN1, ALK, ANGPTL2, APLP2, ARL4C, ATF3, AVPI1, BAK1, BAMBI, BAX, BBC3, BCL2L1, BDNF, BDNF-AS, BECN1, BIK, C3, CAPRIN2, CASP10, CCM2, CCR7, CD274, CD55, CD59, CDKN1A, CITED2, CLEC16A, CLU, CSF1, CSF3, CSNK1G1, CSNK2B, CSPG4, CSTA, CTSB, CTSL, CYFIP2, DBI, DHRS3, DOCK3, DUOX2, DUSP5, DUSP6, EDA2R, EDEM1, EDN2, EGR2, EIF2B5, ELF3, EPHA4, F3, FAM49B, FA…
GO:0050790	regulation of catalytic activity	GO_BiologicalProcess-EBI-UniProt-GOA_27.02.2019_00h00	7.32314e-08	0.000140311	1.55003e-05	1.55003e-05	[3]	Group13	7.12291	204	[ABHD5, ACER2, ACSL1, ADCY8, ADGRV1, ADRB2, AGRN, AKR1B10, ALK, ANXA2, ANXA4, APLP2, APOBEC3C, ARAP2, ARHGAP10, AVPI1, BAG1, BAK1, BAX, BBC3, BBS4, BCL6, BDNF, BDNF-AS, BECN1, BMP2K, C3, C6orf89, CAMKK1, CAPN1, CASP10, CCNA1, CCR7, CD2BP2, CDC37, CDKN1A, CEP250, CLU, COL7A1, CSF1, CSNK2B, CSPG4, CSTA, CTSB, CYFIP2, DAZAP2, DBI, DCP1B, DCUN1D3, DDR1, DFFA, DOCK3, DSC3, DUSP1, DUSP10, DUSP4, DUSP5,…
GO:0070887	cellular response to chemical stimulus	GO_BiologicalProcess-EBI-UniProt-GOA_27.02.2019_00h00	7.75383e-13	1.50657e-09	1.55003e-05	1.55003e-05	[3]	Group13	7.31954	290	[ABTB2, ACER2, ACSL1, ACVR1B, ADAMTS7, ADCY8, ADGRV1, ADRB2, AGRN, AGTRAP, AKIRIN1, AKR1B10, ALDH1A2, ANGPTL2, ANK3, ANXA2, APLP1, APLP2, AQP3, ASS1, ATF3, ATG7, ATP1A1, ATP6V0A1, ATP6V1B2, ATP6V1D, ATP6V1E1, BAG1, BAK1, BAMBI, BAX, BBC3, BBS4, BCL2L1, BCL6, BDNF, BDNF-AS, BECN1, C3, CA1, CCDC3, CCM2, CCR7, CCT6A, CD274, CD55, CDC37, CDC42EP4, CDIP1, CDKN1A, CEP250, CES2, CES3, CFL1, CHMP1B, CHRD…
GO:1901700	response to oxygen-containing compound	GO_BiologicalProcess-EBI-UniProt-GOA_27.02.2019_00h00	1.89735e-06	0.00355184	1.55003e-05	1.55003e-05	[3]	Group13	7.27969	152	[ACER2, ACSL1, ADCY8, ADM, ADRB2, AGRN, AGTRAP, AKR1B10, ALDH1A2, ANGPTL2, APLP1, APLP2, APTX, AQP3, ASS1, ATG7, ATP1A1, ATP6V0A1, ATP6V1B2, ATP6V1D, ATP6V1E1, BAG1, BAK1, BCL2L1, BECN1, CATSPERG, CCR7, CCT6A, CD274, CD55, CDKN1A, CFL1, CHMP1B, CLDN1, CLU, CSF3, CSNK2B, CSTA, CTSB, CYP26B1, DOCK3, DSG2, DUOX2, DUSP1, DUSP10, EDEM1, EFTUD2, EGR2, EIF2B5, EIF4G1, EPHA4, ERCC6L2, FADS1, FAM210B, FBX…
GO:0010646	regulation of cell communication	GO_BiologicalProcess-EBI-UniProt-GOA_27.02.2019_00h00	4.77118e-08	9.16544e-05	1.55003e-05	1.55003e-05	[3, 4]	Group13	6.63475	291	[ACHE, ACPP, ACVR1B, ADCY8, ADGRV1, ADM, ADRB2, AKAP12, ALK, ANK3, APLP1, APLP2, ARAP2, ARHGAP10, ARL4C, ATF3, AVPI1, BAK1, BAMBI, BAX, BBC3, BCL2L1, BCL6, BDNF, BDNF-AS, BECN1, BIK, C2CD3, C3, C6orf89, CALCB, CAPN1, CAPRIN2, CASP10, CCDC3, CCM2, CCR7, CD55, CDC37, CDKN1A, CEP250, CHRD, CITED2, CLEC16A, CLU, CRABP2, CSF1, CSF3, CSNK1G1, CSNK2B, CSPG4, CSTA, CTSB, CXADR, CXCL16, CYFIP2, CYP26B1, D…
GO:0010941	regulation of cell death	GO_BiologicalProcess-EBI-UniProt-GOA_27.02.2019_00h00	5.82587e-09	1.12323e-05	1.55003e-05	1.55003e-05	[3, 4]	Group13	7.75662	167	[ACER2, ACTN1, ADM, ADRB2, ALDH1A2, ALK, ANXA4, ARHGAP10, ATF3, ATF5, ATG7, ATOX1, BAG1, BAK1, BAX, BBC3, BCL2L1, BCL6, BDNF, BDNF-AS, BECN1, BIK, BRMS1, BTBD10, C3, CASP10, CCR7, CD274, CDKN1A, CFL1, CHMP4B, CITED2, CLU, CSF1, CSF3, CSTA, CTSB, DCUN1D3, DDB1, DFFA, DHRS2, DOCK3, DRAXIN, DUSP1, DUSP6, EGLN3, EIF2B5, EIF4G1, F3, FAS, FBXO44, FBXW7, FEM1B, FGF2, FGFR2, FOSL1, FOXQ1, FTH1, GADD45A, …
GO:0080134	regulation of response to stress	GO_BiologicalProcess-EBI-UniProt-GOA_27.02.2019_00h00	5.2451e-08	0.000100706	1.55003e-05	1.55003e-05	[3, 4]	Group13	7.74026	149	[ADCY8, ADRB2, ANGPTL2, ANXA2, APLP2, ARL4C, ATG7, BAG1, BAK1, BAX, BBC3, BCL2L1, BCL6, C3, CCM2, CCR7, CDC37, CDKN1A, CLU, CSTA, CTSB, CTSL, DDX39B, DNASE1, DOCK3, DUOX2, DUOXA2, DUSP1, DUSP10, EDA2R, EDEM1, EIF4G1, ENPP2, EPB41L4B, EPHA4, EPPK1, ERAP1, ETAA1, F3, FAS, FBXO44, FBXW7, FEM1B, FGF2, FKBP4, FLOT1, FZD5, GADD45A, GADD45B, GCH1, GPX1, GSTP1, H2AFY, HIF1A, HLA-E, HPX, HRAS, HSP90AB1, H…
GO:0007166	cell surface receptor signaling pathway	GO_BiologicalProcess-EBI-UniProt-GOA_27.02.2019_00h00	4.34837e-07	0.000826625	1.55003e-05	1.55003e-05	[3, 4, 5]	Group13	6.68264	251	[ACPP, ACSL1, ACVR1B, ADAMTS1, ADGRG6, ADGRV1, ADRB2, ALK, ANGPTL2, ANXA2, ANXA4, APLP2, ATF3, ATP6V0A1, ATP6V1B2, ATP6V1D, ATP6V1E1, BAG1, BAK1, BAMBI, BAX, BBS4, BBS7, BCL2L1, BCL6, BDNF, BDNF-AS, BHLHE40, BLOC1S2, C2CD3, C3, CA1, CAPN1, CAPRIN2, CASP10, CCDC3, CCM2, CCR7, CD274, CD55, CD59, CDC37, CDIP1, CDKN1A, CFL1, CHRD, CITED2, CPE, CSF1, CSF3, CSNK1G1, CSNK2B, CSPG4, CSTA, CYFIP2, DDB1, D…
GO:0009966	regulation of signal transduction	GO_BiologicalProcess-EBI-UniProt-GOA_27.02.2019_00h00	2.98721e-09	5.77727e-06	1.55003e-05	1.55003e-05	[3, 4, 5]	Group13	6.9	276	[ACPP, ACVR1B, ADGRV1, ADM, ADRB2, AKAP12, ALK, APLP1, APLP2, ARAP2, ARHGAP10, ARL4C, ATF3, AVPI1, BAK1, BAMBI, BAX, BBC3, BCL2L1, BCL6, BDNF, BDNF-AS, BECN1, BIK, C2CD3, C3, C6orf89, CALCB, CAPN1, CAPRIN2, CASP10, CCDC3, CCM2, CCR7, CD55, CDC37, CDKN1A, CEP250, CHRD, CITED2, CLEC16A, CLU, CRABP2, CSF1, CSF3, CSNK1G1, CSNK2B, CSPG4, CSTA, CTSB, CXCL16, CYFIP2, CYP26B1, DHRS3, DOCK3, DOT1L, DRAXIN…
GO:0010604	positive regulation of macromolecule metabolic process	GO_BiologicalProcess-EBI-UniProt-GOA_27.02.2019_00h00	2.63484e-07	0.000502992	1.55003e-05	1.55003e-05	[3, 4, 5]	Group13	6.6416	265	[ACER2, ACSL1, ACTBL2, ACTN1, ACVR1B, ADCY8, ADRB2, AGRN, ALDH1A2, ALK, ANGPTL2, ANK3, ANXA2, ASXL3, ATF3, ATF5, ATG7, AVPI1, BAG1, BAK1, BAMBI, BAX, BBC3, BBS7, BCL6, BDNF, BDNF-AS, BHLHE40, BRMS1, BUD23, C3, C6orf89, CAMKK1, CAPRIN2, CASP10, CCM2, CCR7, CCT5, CCT6A, CCT7, CDKN1A, CITED2, CITED4, CLU, CREM, CSF1, CSF3, CSNK2B, CSPG4, CSTA, CTSB, CXADR, CYFIP2, CYP26B1, DAZAP2, DCP1B, DCUN1D3, DD…
GO:0010647	positive regulation of cell communication	GO_BiologicalProcess-EBI-UniProt-GOA_27.02.2019_00h00	2.01482e-07	0.00038483	1.55003e-05	1.55003e-05	[3, 4, 5]	Group13	7.3523	168	[ACPP, ACVR1B, ADCY8, ADGRV1, ADRB2, AKAP12, ALK, ANK3, APLP2, ARL4C, ATF3, AVPI1, BAK1, BAMBI, BAX, BBC3, BCL2L1, BDNF, BDNF-AS, BECN1, BIK, C3, CAPRIN2, CASP10, CCM2, CCR7, CDKN1A, CITED2, CLEC16A, CLU, CSF1, CSF3, CSNK1G1, CSNK2B, CSPG4, CSTA, CTSB, CYFIP2, DHRS3, DOCK3, DUSP5, DUSP6, EDA2R, EGR2, ELF3, EPHA4, F3, FAS, FBXO44, FBXW7, FGF2, FGF23, FGFR2, FLOT1, FZD5, GADD45A, GADD45B, GDF15, GN…
GO:0010648	negative regulation of cell communication	GO_BiologicalProcess-EBI-UniProt-GOA_27.02.2019_00h00	1.81196e-06	0.00339743	1.55003e-05	1.55003e-05	[3, 4, 5]	Group13	7.60095	128	[ACHE, ADCY8, ADM, ADRB2, APLP1, ATF3, BAMBI, BAX, BCL2L1, BCL6, C6orf89, CCDC3, CCM2, CHRD, CLU, CSTA, CYP26B1, DHRS3, DOCK3, DRAXIN, DSC3, DUSP1, DUSP10, DUSP4, DUSP5, DUSP6, EPHA2, FAS, FBXO44, FBXW7, FGF23, GCLC, GDF15, GDNF, GPC1, GPNMB, GPX1, GSTP1, HHAT, HIF1A, HIST1H2BJ, ICAM1, IRF4, ITGA3, KLF6, KLHL12, KREMEN1, LBH, LGMN, LIF, LITAF, LRPAP1, MCC, MCL1, MDM2, NAF1, NCOA3, NEU1, NKX3-1, N…
GO:0031325	positive regulation of cellular metabolic process	GO_BiologicalProcess-EBI-UniProt-GOA_27.02.2019_00h00	1.61328e-08	3.10233e-05	1.55003e-05	1.55003e-05	[3, 4, 5]	Group13	6.80563	271	[ABHD5, ACER2, ACSL1, ACTBL2, ACTN1, ACVR1B, ADCY8, ADM, ADRB2, AGRN, ALK, ANGPTL2, ANXA2, ASS1, ASXL3, ATF3, ATF5, ATG7, AVPI1, BAG1, BAK1, BAMBI, BAX, BBC3, BBS7, BCL6, BDNF, BDNF-AS, BECN1, BHLHE40, BRMS1, BTBD10, BUD23, C3, C6orf89, CAMKK1, CAPRIN2, CASP10, CCM2, CCR7, CCT5, CCT6A, CCT7, CDC37, CDKN1A, CITED2, CITED4, CLEC16A, CLU, CREM, CSF1, CSF3, CSNK2B, CSPG4, CSTA, CTSB, CXADR, CYFIP2, D…
GO:0034097	response to cytokine	GO_BiologicalProcess-EBI-UniProt-GOA_27.02.2019_00h00	2.60893e-09	5.04827e-06	1.55003e-05	1.55003e-05	[4]	Group13	8.47121	128	[ACSL1, ADAMTS7, ADRB2, ALDH1A2, ANGPTL2, ANXA2, APLP2, ASS1, BBS4, BCL2L1, BCL6, CA1, CCDC3, CCM2, CCR7, CD274, CDC37, CDC42EP4, CDIP1, CDKN1A, CEP250, CFL1, CLDN1, CSF1, CSF3, CSNK2B, CSTA, CXCL16, DOCK3, DUOX2, DUSP1, EDA2R, EDN2, EIF4G1, F3, FAS, FCGR1A, FGF2, FGF23, FOSL1, GCH1, GCLC, GSDME, GSTP1, HFE, HIF1A, HIST1H2BJ, HIST1H3D, HLA-E, HPX, HRAS, HSP90AB1, HSPA8, ICAM1, IFNLR1, IKBKB, IL13…
GO:0035556	intracellular signal transduction	GO_BiologicalProcess-EBI-UniProt-GOA_27.02.2019_00h00	1.08778e-06	0.00205155	1.55003e-05	1.55003e-05	[3, 4, 5]	Group13	6.71707	231	[ACER2, ADCY8, ADGRG6, ADGRV1, ADM, ADRB2, AEN, AKAP12, ALK, APLP1, ARAP2, ARHGAP10, ARL4C, ASB1, ATF3, AVPI1, BAK1, BAX, BBC3, BCL2L1, BCL6, BECN1, C6orf89, CALCB, CAMKK1, CASP10, CCM2, CCR7, CDC42EP3, CDC42EP4, CDIP1, CDKN1A, CEP250, CFL1, CLEC16A, CLU, CSF1, CSF3, CSNK2B, CSPG4, CSTA, CTSB, DGKA, DGKD, DHRS3, DOCK3, DSC3, DUSP1, DUSP10, DUSP4, DUSP5, DUSP6, E2F7, EDA2R, EDN2, EGR2, EPHA2, EPHA…
GO:0051173	positive regulation of nitrogen compound metabolic process	GO_BiologicalProcess-EBI-UniProt-GOA_27.02.2019_00h00	7.93337e-07	0.00150258	1.55003e-05	1.55003e-05	[3, 4, 5]	Group13	6.62304	253	[ACER2, ACSL1, ACTBL2, ACTN1, ACVR1B, ADCY8, ADRB2, AGRN, ALK, ANGPTL2, ANXA2, ASS1, ASXL3, ATF3, ATF5, ATG7, AVPI1, BAG1, BAK1, BAMBI, BAX, BBC3, BBS7, BCL6, BDNF, BDNF-AS, BHLHE40, BRMS1, BUD23, C3, C6orf89, CAMKK1, CAPRIN2, CASP10, CCM2, CCR7, CCT5, CCT6A, CCT7, CDKN1A, CITED2, CITED4, CLU, CREM, CSF1, CSF3, CSNK2B, CSPG4, CSTA, CTSB, CXADR, CYFIP2, DAZAP2, DCP1B, DCUN1D3, DDB1, DDR1, DDX39B, …
GO:0071310	cellular response to organic substance	GO_BiologicalProcess-EBI-UniProt-GOA_27.02.2019_00h00	5.02887e-11	9.74596e-08	1.55003e-05	1.55003e-05	[4]	Group13	7.39276	243	[ACSL1, ACVR1B, ADAMTS7, ADCY8, ADRB2, AGRN, AGTRAP, ALDH1A2, ANGPTL2, ANXA2, APLP1, APLP2, ASS1, ATF3, ATG7, ATP1A1, ATP6V0A1, ATP6V1B2, ATP6V1D, ATP6V1E1, BAG1, BAK1, BAMBI, BAX, BBC3, BBS4, BCL2L1, BCL6, BDNF, BDNF-AS, BECN1, C3, CA1, CCDC3, CCM2, CCR7, CCT6A, CD274, CD55, CDC37, CDC42EP4, CDIP1, CDKN1A, CEP250, CFL1, CHMP1B, CHRD, CITED2, CLDN1, CLU, CSF1, CSF3, CSNK2B, CSPG4, CSTA, CTSB, CTS…
GO:0009967	positive regulation of signal transduction	GO_BiologicalProcess-EBI-UniProt-GOA_27.02.2019_00h00	3.5663e-07	0.000679024	1.55003e-05	1.55003e-05	[3, 4, 5, 6]	Group13	7.43762	155	[ACPP, ACVR1B, ADGRV1, ADRB2, AKAP12, ALK, APLP2, ARL4C, ATF3, AVPI1, BAK1, BAMBI, BAX, BBC3, BCL2L1, BDNF, BDNF-AS, BECN1, BIK, C3, CAPRIN2, CASP10, CCM2, CCR7, CDKN1A, CITED2, CLEC16A, CSF1, CSF3, CSNK1G1, CSNK2B, CSPG4, CTSB, CYFIP2, DHRS3, DOCK3, DUSP5, DUSP6, EDA2R, EGR2, ELF3, EPHA4, F3, FAS, FBXO44, FBXW7, FGF2, FGF23, FGFR2, FLOT1, FZD5, GADD45A, GADD45B, GDF15, GNAS, GPNMB, GPX1, GSDME, …
GO:0009968	negative regulation of signal transduction	GO_BiologicalProcess-EBI-UniProt-GOA_27.02.2019_00h00	3.70118e-06	0.00686938	1.55003e-05	1.55003e-05	[3, 4, 5, 6]	Group13	7.6087	119	[ADM, ADRB2, APLP1, ATF3, BAMBI, BAX, BCL2L1, BCL6, C6orf89, CCDC3, CHRD, CLU, CSTA, CYP26B1, DHRS3, DOCK3, DRAXIN, DSC3, DUSP1, DUSP10, DUSP4, DUSP5, DUSP6, EPHA2, FAS, FBXO44, FBXW7, GCLC, GDF15, GDNF, GPC1, GPX1, GSTP1, HHAT, HIF1A, HIST1H2BJ, ICAM1, IRF4, ITGA3, KLF6, KLHL12, KREMEN1, LBH, LGMN, LIF, LITAF, LRPAP1, MCC, MCL1, MDM2, NAF1, NCOA3, NEU1, NKX3-1, NR1D1, NRG1, NTN1, NXN, OPTN, PARP…
GO:0051246	regulation of protein metabolic process	GO_BiologicalProcess-EBI-UniProt-GOA_27.02.2019_00h00	1.08445e-06	0.00204636	1.55003e-05	1.55003e-05	[4, 5]	Group13	6.71902	231	[ACER2, ACSL1, ACVR1B, ADCY8, ADRB2, ALK, ANXA2, APLP2, APOBEC3C, ASB1, ATF3, ATG7, AVPI1, BAK1, BAX, BBC3, BBS7, BCL6, BDNF, BDNF-AS, BHLHE40, BRMS1, C2CD3, C3, C6orf89, CAMKK1, CAPRIN2, CASP10, CCM2, CCNA1, CCR7, CDC37, CDKN1A, CLEC16A, CLU, COL7A1, CSF1, CSF3, CSNK2B, CSPG4, CSTA, CTSB, CXADR, CYFIP2, DAZAP2, DCP1B, DCUN1D3, DDB1, DDR1, DDX39B, DHRS3, DOCK3, DPH1, DPH2, DPH3, DSC3, DUSP1, DUSP…
GO:0016310	phosphorylation	GO_BiologicalProcess-EBI-UniProt-GOA_27.02.2019_00h00	2.26116e-06	0.00421707	1.55003e-05	1.55003e-05	[5]	Group13	6.83293	200	[ACSL1, ACVR1B, ADCY8, ADK, ADRB2, AK1, ALK, ANXA2, ARL4C, ATF3, AVPI1, BAK1, BAX, BDNF, BDNF-AS, BMP2K, BTBD10, C3, C6orf89, CAMKK1, CAPRIN2, CCM2, CCNA1, CCR7, CDC37, CDKN1A, CFL1, CLU, CSF1, CSF3, CSNK1G1, CSNK2B, CSPG4, CTSB, CXADR, DAZAP2, DCP1B, DDR1, DGKA, DGKD, DHRS3, DOCK3, DOLK, DUSP1, DUSP10, DUSP4, DUSP5, DUSP6, EDA2R, EIF4G1, ENPP2, EPB41L4B, EPHA2, EPHA4, ETAA1, FAS, FBXO44, FBXW7, …
GO:0032268	regulation of cellular protein metabolic process	GO_BiologicalProcess-EBI-UniProt-GOA_27.02.2019_00h00	6.69998e-08	0.000128439	1.55003e-05	1.55003e-05	[4, 5, 6]	Group13	6.97458	225	[ACER2, ACSL1, ACVR1B, ADCY8, ADRB2, ALK, ANXA2, APLP2, APOBEC3C, ATF3, ATG7, AVPI1, BAK1, BAX, BBC3, BBS7, BCL6, BDNF, BDNF-AS, BHLHE40, BRMS1, C3, C6orf89, CAMKK1, CAPRIN2, CASP10, CCM2, CCNA1, CCR7, CDC37, CDKN1A, CLEC16A, CLU, COL7A1, CSF1, CSF3, CSNK2B, CSPG4, CSTA, CTSB, CXADR, CYFIP2, DAZAP2, DCP1B, DCUN1D3, DDR1, DDX39B, DHRS3, DOCK3, DPH1, DPH2, DPH3, DSC3, DUSP1, DUSP10, DUSP4, DUSP5, D…
GO:0051247	positive regulation of protein metabolic process	GO_BiologicalProcess-EBI-UniProt-GOA_27.02.2019_00h00	2.21439e-06	0.00413206	1.55003e-05	1.55003e-05	[4, 5, 6]	Group13	7.23404	153	[ACER2, ACSL1, ACVR1B, ADCY8, ADRB2, ALK, ANXA2, ATG7, AVPI1, BAK1, BAX, BBC3, BBS7, BCL6, BDNF, BDNF-AS, BHLHE40, BRMS1, C3, C6orf89, CAMKK1, CAPRIN2, CASP10, CCM2, CCR7, CDKN1A, CLU, CSF1, CSF3, CSNK2B, CSPG4, CTSB, CYFIP2, DAZAP2, DCP1B, DCUN1D3, DDB1, DDX39B, DHRS3, DOCK3, DUSP5, DUSP6, EDA2R, EDEM1, EGLN3, EIF2B5, EIF4G1, ENPP2, EPHA4, ETAA1, F3, FAS, FBXO22, FBXO44, FBXW7, FGF2, FGF23, FGFR…
GO:0071345	cellular response to cytokine stimulus	GO_BiologicalProcess-EBI-UniProt-GOA_27.02.2019_00h00	7.50777e-09	1.446e-05	1.55003e-05	1.55003e-05	[5]	Group13	8.53485	120	[ACSL1, ADAMTS7, ADRB2, ANGPTL2, ANXA2, APLP2, ASS1, BBS4, BCL2L1, BCL6, CA1, CCDC3, CCM2, CCR7, CDC37, CDC42EP4, CDIP1, CDKN1A, CEP250, CFL1, CLDN1, CSF1, CSF3, CSNK2B, DOCK3, DUOX2, DUSP1, EDA2R, EDN2, EIF4G1, F3, FAS, FCGR1A, FGF2, FGF23, GSDME, GSTP1, HFE, HIF1A, HIST1H2BJ, HIST1H3D, HLA-E, HPX, HRAS, HSP90AB1, HSPA8, ICAM1, IFNLR1, IKBKB, IL13RA2, IL1RAP, IL1RL1, IL24, IL4R, IL6R, INA, INPPL…
GO:1902531	regulation of intracellular signal transduction	GO_BiologicalProcess-EBI-UniProt-GOA_27.02.2019_00h00	6.43762e-07	0.00122186	1.55003e-05	1.55003e-05	[4, 5, 6]	Group13	7.25141	167	[ADGRV1, ADRB2, AKAP12, ALK, APLP1, ARAP2, ARHGAP10, ARL4C, ATF3, AVPI1, BAX, BBC3, BCL2L1, BCL6, BECN1, CASP10, CCM2, CCR7, CDKN1A, CLEC16A, CLU, CSF1, CSF3, CSNK2B, CSPG4, CSTA, DHRS3, DOCK3, DSC3, DUSP1, DUSP10, DUSP4, DUSP5, DUSP6, EDA2R, EGR2, EPHA2, EPHA4, EPS8L2, F3, FAS, FBXO44, FBXW7, FGF2, FGF23, FGFR2, FLOT1, FZD5, GADD45A, GADD45B, GDF15, GNAI1, GNAS, GPAT3, GPNMB, GPX1, GSDME, GSTP1,…
GO:0019220	regulation of phosphate metabolic process	GO_BiologicalProcess-EBI-UniProt-GOA_27.02.2019_00h00	1.46208e-06	0.0027487	1.55003e-05	1.55003e-05	[5, 6]	Group13	7.1968	162	[ACMSD, ACSL1, ACVR1B, ADCY8, ADRB2, ALK, ANXA2, ATF3, AVPI1, BAK1, BAX, BDNF, BDNF-AS, BTBD10, C3, CAMKK1, CAPRIN2, CCM2, CCNA1, CCR7, CD2BP2, CDC37, CDKN1A, CLU, CSF1, CSF3, CSNK2B, CSPG4, CXADR, DAZAP2, DCP1B, DDR1, DHRS3, DOCK3, DSC3, DUSP1, DUSP10, DUSP4, DUSP5, DUSP6, EDA2R, EIF4G1, ELL, ENPP2, EPB41L4B, EPHA2, EPHA4, ETAA1, FAS, FBXO44, FBXW7, FGF2, FGF23, FGFR2, FLOT1, FNIP2, FZD5, GADD45…
GO:0030162	regulation of proteolysis	GO_BiologicalProcess-EBI-UniProt-GOA_27.02.2019_00h00	4.90603e-07	0.000932145	1.55003e-05	1.55003e-05	[5, 6]	Group13	8.88158	81	[ACER2, ANXA2, APLP2, APOBEC3C, BAK1, BAX, BBC3, BBS7, C2CD3, C3, CASP10, CLEC16A, CLU, COL7A1, CSTA, CTSB, CYFIP2, DOCK3, EDEM1, EGLN3, EPHA4, F3, FAS, FBXO22, FBXO44, FBXW7, GAS1, GCLC, GNPDA1, GPX1, GSTP1, HFE, HIP1R, HSP90AB1, LAMP3, LGMN, MDM2, MELTF, NAF1, NKX3-1, NRG1, PCOLCE2, PDCD6IP, PERP, PIDD1, PLK2, PLK3, POR, PSME2, PSMF1, PTPN3, REXO2, RNF19B, RPS27L, SERPINB1, SERPINB3, SERPINB4, …
GO:0032270	positive regulation of cellular protein metabolic process	GO_BiologicalProcess-EBI-UniProt-GOA_27.02.2019_00h00	2.66328e-07	0.000507887	1.55003e-05	1.55003e-05	[4, 5, 6, 7]	Group13	7.54527	150	[ACER2, ACSL1, ACVR1B, ADCY8, ADRB2, ALK, ANXA2, ATG7, AVPI1, BAK1, BAX, BBC3, BBS7, BCL6, BDNF, BDNF-AS, BHLHE40, BRMS1, C3, C6orf89, CAMKK1, CAPRIN2, CASP10, CCM2, CCR7, CDKN1A, CLU, CSF1, CSF3, CSNK2B, CSPG4, CTSB, CYFIP2, DAZAP2, DCP1B, DCUN1D3, DDX39B, DHRS3, DOCK3, DUSP5, DUSP6, EDA2R, EDEM1, EGLN3, EIF2B5, EIF4G1, ENPP2, EPHA4, ETAA1, F3, FAS, FBXO22, FBXO44, FBXW7, FGF2, FGF23, FGFR2, FLO…
GO:0045937	positive regulation of phosphate metabolic process	GO_BiologicalProcess-EBI-UniProt-GOA_27.02.2019_00h00	4.12231e-06	0.00764277	1.55003e-05	1.55003e-05	[5, 6, 7]	Group13	7.72414	112	[ACSL1, ACVR1B, ADCY8, ADRB2, ALK, ANXA2, AVPI1, BDNF, BDNF-AS, BTBD10, C3, CAMKK1, CAPRIN2, CCM2, CCR7, CDKN1A, CLU, CSF1, CSF3, CSNK2B, CSPG4, DAZAP2, DCP1B, DHRS3, DOCK3, DUSP5, DUSP6, EDA2R, EIF4G1, ENPP2, EPHA4, ETAA1, FAS, FBXO44, FBXW7, FGF2, FGF23, FGFR2, FLOT1, FNIP2, FZD5, GADD45A, GADD45B, GCN1, GDF15, GPNMB, GSDME, HFE, HIF1A, HPX, HRAS, HSP90AB1, ICAM1, IL24, IL6R, ITGA2, KSR1, LIF, …
GO:0006468	protein phosphorylation	GO_BiologicalProcess-EBI-UniProt-GOA_27.02.2019_00h00	3.45062e-06	0.00641125	1.55003e-05	1.55003e-05	[6, 7]	Group13	7.01182	172	[ACSL1, ACVR1B, ADCY8, ADRB2, ALK, ANXA2, ARL4C, ATF3, AVPI1, BAK1, BAX, BDNF, BDNF-AS, BMP2K, C3, C6orf89, CAMKK1, CAPRIN2, CCM2, CCNA1, CCR7, CDC37, CDKN1A, CFL1, CLU, CSF1, CSF3, CSNK1G1, CSNK2B, CSPG4, CTSB, CXADR, DAZAP2, DCP1B, DDR1, DHRS3, DOCK3, DUSP1, DUSP10, DUSP4, DUSP5, DUSP6, EDA2R, EIF4G1, ENPP2, EPHA2, EPHA4, ETAA1, FAS, FBXO44, FBXW7, FGF2, FGF23, FGFR2, FLOT1, FNIP2, FZD5, GADD45…
GO:0042325	regulation of phosphorylation	GO_BiologicalProcess-EBI-UniProt-GOA_27.02.2019_00h00	4.27007e-07	0.000812167	1.55003e-05	1.55003e-05	[6, 7]	Group13	7.48266	151	[ACSL1, ACVR1B, ADCY8, ADRB2, ALK, ANXA2, ATF3, AVPI1, BAK1, BAX, BDNF, BDNF-AS, BTBD10, C3, CAMKK1, CAPRIN2, CCM2, CCNA1, CCR7, CDC37, CDKN1A, CLU, CSF1, CSF3, CSNK2B, CSPG4, CXADR, DAZAP2, DCP1B, DDR1, DHRS3, DOCK3, DUSP1, DUSP10, DUSP4, DUSP5, DUSP6, EDA2R, EIF4G1, ENPP2, EPB41L4B, EPHA2, EPHA4, ETAA1, FAS, FBXO44, FBXW7, FGF2, FGF23, FGFR2, FLOT1, FNIP2, FZD5, GADD45A, GADD45B, GCN1, GDF15, G…
GO:0045862	positive regulation of proteolysis	GO_BiologicalProcess-EBI-UniProt-GOA_27.02.2019_00h00	6.30708e-08	0.00012097	1.55003e-05	1.55003e-05	[5, 6, 7, 8]	Group13	11.1828	52	[ACER2, BAK1, BAX, BBC3, BBS7, CASP10, CLU, CTSB, CYFIP2, EDEM1, EGLN3, EPHA4, F3, FAS, FBXO22, FBXO44, FBXW7, GCLC, HIP1R, LGMN, MDM2, MELTF, NAF1, NKX3-1, PCOLCE2, PDCD6IP, PERP, PIDD1, PLK2, PLK3, PSME2, RNF19B, RPS27L, SERPINB3, SERPINB4, SH3RF2, SIRT1, SOCS4, SOCS6, STAT3, TAP1, TEP1, TFRC, TMEFF2, TNFRSF10A, TNFRSF10B, TNFRSF1A, TNFSF15, TNIP1, TREM2, TRIM67, TXNRD1]
GO:0001932	regulation of protein phosphorylation	GO_BiologicalProcess-EBI-UniProt-GOA_27.02.2019_00h00	1.52979e-06	0.00287448	1.55003e-05	1.55003e-05	[6, 7, 8]	Group13	7.47967	138	[ACSL1, ACVR1B, ADCY8, ADRB2, ALK, ANXA2, ATF3, AVPI1, BAK1, BAX, BDNF, BDNF-AS, C3, CAMKK1, CAPRIN2, CCM2, CCNA1, CCR7, CDC37, CDKN1A, CLU, CSF1, CSF3, CSNK2B, CSPG4, CXADR, DAZAP2, DCP1B, DDR1, DHRS3, DOCK3, DUSP1, DUSP10, DUSP4, DUSP5, DUSP6, EDA2R, EIF4G1, ENPP2, EPHA2, EPHA4, ETAA1, FAS, FBXO44, FBXW7, FGF2, FGF23, FGFR2, FLOT1, FNIP2, FZD5, GADD45A, GADD45B, GCN1, GDF15, GPNMB, GSDME, GSTP1…
GO:0042327	positive regulation of phosphorylation	GO_BiologicalProcess-EBI-UniProt-GOA_27.02.2019_00h00	1.43645e-06	0.00270196	1.55003e-05	1.55003e-05	[6, 7, 8]	Group13	7.97048	108	[ACSL1, ACVR1B, ADCY8, ADRB2, ALK, ANXA2, AVPI1, BDNF, BDNF-AS, BTBD10, C3, CAMKK1, CAPRIN2, CCM2, CCR7, CDKN1A, CLU, CSF1, CSF3, CSNK2B, CSPG4, DAZAP2, DCP1B, DHRS3, DOCK3, DUSP5, DUSP6, EDA2R, EIF4G1, ENPP2, EPHA4, ETAA1, FAS, FBXO44, FBXW7, FGF2, FGF23, FGFR2, FLOT1, FNIP2, FZD5, GADD45A, GADD45B, GCN1, GDF15, GPNMB, GSDME, HFE, HIF1A, HPX, HRAS, HSP90AB1, ICAM1, IL24, IL6R, KSR1, LIF, LIPC, M…
